# Supplementary material
Source: PubMed Central journal article supplement (PMC3938328)
Supplement: NIHMS336799-supplement-1.pdf [file NIHMS336799-supplement-1.pdf]

# SUPPLEMENTAL MATERIAL

**Supplementary Table 1. Genes differential expressed between 3h ischemic stroke (3hIS) and non-stroke controls ( C ) ( $\alpha \leq 0.05$ , fold change  $\geq |1.2|$ )**

| Probeset ID  | DE list                   | Gene Symbol         | Fold Change                  |                                  | Cytoband          | Gene Title                                                                 | UniGene ID |
|--------------|---------------------------|---------------------|------------------------------|----------------------------------|-------------------|----------------------------------------------------------------------------|------------|
|              |                           |                     | IS * Male vs. Control * Male | IS * Female vs. Control * Female |                   |                                                                            |            |
| 1553007_a_at | 3hISvsC_up_MaleSpecific   | ODZ1                | 1.38                         | NA                               | Xq25              | odz, odd Oz/ten-m homolog 1(Drosophila)                                    | Hs.23796   |
| 1554206_at   | 3hISvsC_up_MaleSpecific   | TMLHE               | 1.39                         | NA                               | Xq28              | trimethyllysine hydroxylase, epsilor                                       | Hs.133321  |
| 1559510_at   | 3hISvsC_up_MaleSpecific   | BHLHB9              | 1.51                         | NA                               | Xq23              | Basic helix-loop-helix domain containing, class B, 9                       | Hs.4276    |
| 201472_at    | 3hISvsC_up_MaleSpecific   | VBP1                | 1.35                         | NA                               | Xq28              | von Hippel-Lindau binding protein 1                                        | Hs.436803  |
| 202105_at    | 3hISvsC_up_MaleSpecific   | IGBP1               | 1.23                         | NA                               | Xq13.1-q13.3      | immunoglobulin (CD79A) binding protein 1                                   | Hs.496267  |
| 206696_at    | 3hISvsC_up_MaleSpecific   | GPR143              | 1.33                         | NA                               | Xp22.3            | G protein-coupled receptor 143                                             | Hs.74124   |
| 209022_at    | 3hISvsC_up_MaleSpecific   | STAG2               | 1.31                         | NA                               | Xq25              | stromal antigen 2                                                          | Hs.496710  |
| 214009_at    | 3hISvsC_up_MaleSpecific   | MSL3L1              | 1.40                         | NA                               | Xp22.3            | male-specific lethal 3 homolog (Drosophila)                                | Hs.655288  |
| 214681_at    | 3hISvsC_up_MaleSpecific   | GK                  | 1.51                         | NA                               | Xp21.3            | glycerol kinase                                                            | Hs.1466    |
| 219771_at    | 3hISvsC_up_MaleSpecific   | TBC1D8B             | 1.56                         | NA                               | Xq22.3            | TBC1 domain family, member 8B (with GRAM domain)                           | Hs.351798  |
| 226335_at    | 3hISvsC_up_MaleSpecific   | RPS6KA3             | 1.28                         | NA                               | Xp22.2-p22.1      | ribosomal protein S6 kinase, 90kDa, polypeptide 3                          | Hs.445387  |
| 228968_at    | 3hISvsC_up_MaleSpecific   | ZNF449              | 1.31                         | NA                               | Xq26.3            | zinc finger protein 449                                                    | Hs.28780   |
| 230866_at    | 3hISvsC_up_MaleSpecific   | CYSLTR1             | 1.39                         | NA                               | Xq13.2-q21.1      | cysteinyl leukotriene receptor 1                                           | Hs.201300  |
| 231747_at    | 3hISvsC_up_MaleSpecific   | CYSLTR1             | 1.23                         | NA                               | Xq13.2-q21.1      | cysteinyl leukotriene receptor 1                                           | Hs.201300  |
| 232087_at    | 3hISvsC_up_MaleSpecific   | CXorf23             | 1.61                         | NA                               | Xp22.12           | chromosome X open reading frame 23                                         | Hs.28896   |
| 232157_at    | 3hISvsC_up_MaleSpecific   | SPRY3               | 1.45                         | NA                               | Xq28 and Yq12     | sprouty homolog 3 (Drosophila)                                             | Hs.381912  |
| 236165_at    | 3hISvsC_up_MaleSpecific   | MSL3L1              | 1.48                         | NA                               | ---               | ---                                                                        | ---        |
| 238053_at    | 3hISvsC_up_MaleSpecific   | DHRX                | 1.44                         | NA                               | Xp22.33; Yp11.2   | dehydrogenase/reductase (SDR family) X-linkec                              | Hs.131452  |
| 238989_at    | 3hISvsC_up_MaleSpecific   | C1GALT1C1           | 1.44                         | NA                               | Xq24              | C1GALT1-specific chaperone 1                                               | Hs.643920  |
| 242931_at    | 3hISvsC_up_MaleSpecific   | LONRF3              | 1.38                         | NA                               | Xq24              | LON peptidase N-terminal domain and ring finger 3                          | Hs.144266  |
| 243683_at    | 3hISvsC_up_MaleSpecific   | MORF4L2             | 1.71                         | NA                               | Xq22              | Mortality factor 4 like 2                                                  | Hs.326387  |
| 244470_at    | 3hISvsC_up_MaleSpecific   | RNF12               | 1.27                         | NA                               | Xq13-q21          | Ring finger protein, LIM domain interacting                                | Hs.653288  |
| 1552927_at   | 3hISvsC_up_FemaleSpecific | MAP3K7IP3           | NA                           | 1.48                             | Xp21.2            | TGF-beta activated kinase 1/MAP3K7 binding protein 3                       | Hs.188256  |
| 1557726_at   | 3hISvsC_up_FemaleSpecific | ARMCX4              | NA                           | 1.21                             | Xq22.1            | armadillo repeat containing, X-linked 4                                    | Hs.9728    |
| 1557880_at   | 3hISvsC_up_FemaleSpecific | PCDH11X /// PCDH11Y | NA                           | 1.33                             | Xq21.3 /// Yp11.2 | protocadherin 11 X-linked /// protocadherin 11 Y-linkec                    | Hs.661308  |
| 1562805_at   | 3hISvsC_up_FemaleSpecific | LOC349408           | NA                           | 1.43                             | Xp22.31           | hypothetical LOC349408                                                     | Hs.685035  |
| 1565446_at   | 3hISvsC_up_FemaleSpecific | HPRT1               | NA                           | 1.22                             | Xq26.1            | Hypoxanthine phosphoribosyltransferase 1                                   | Hs.412707  |
| 201210_at    | 3hISvsC_up_FemaleSpecific | DDX3X               | NA                           | 1.20                             | Xp11.3-p11.23     | DEAD (Asp-Glu-Ala-Asp) box polypeptide 3, X-linkec                         | Hs.380774  |
| 201666_at    | 3hISvsC_up_FemaleSpecific | TIMP1               | NA                           | 1.29                             | Xp11.3-p11.23     | TIMP metalloproteinase inhibitor 1                                         | Hs.522632  |
| 205645_at    | 3hISvsC_up_FemaleSpecific | REPS2               | NA                           | 1.55                             | Xp22.2-p22.13     | RALBP1 associated Eps domain containing 2                                  | Hs.186810  |
| 206002_at    | 3hISvsC_up_FemaleSpecific | GPR64               | NA                           | 1.31                             | Xp22.13           | G protein-coupled receptor 64                                              | Hs.146978  |
| 210274_at    | 3hISvsC_up_FemaleSpecific | MAGEA8              | NA                           | 1.22                             | Xq28              | melanoma antigen family A, 8                                               | Hs.522803  |
| 212340_at    | 3hISvsC_up_FemaleSpecific | YIPF6               | NA                           | 1.45                             | Xq12              | Yip1 domain family, member 6                                               | Hs.82719   |
| 212457_at    | 3hISvsC_up_FemaleSpecific | TFE3                | NA                           | 1.22                             | Xp11.22           | transcription factor binding to IGHM enhancer 3                            | Hs.274184  |
| 212741_at    | 3hISvsC_up_FemaleSpecific | MAOA                | NA                           | 2.67                             | Xp11.3            | monoamine oxidase A                                                        | Hs.183109  |
| 216722_at    | 3hISvsC_up_FemaleSpecific | VENTXP1             | NA                           | 1.21                             | Xp21.3            | VENT homeobox (Xenopus laevis) pseudogene 1                                | Hs.447377  |
| 230030_at    | 3hISvsC_up_FemaleSpecific | HS6ST2              | NA                           | 1.28                             | Xq26.2            | heparan sulfate 6-O-sulfotransferase 2                                     | Hs.385956  |
| 244825_at    | 3hISvsC_up_FemaleSpecific | SHROOM4             | NA                           | 1.59                             | Xp11.22           | shroom family member 4                                                     | Hs.420541  |
| 200737_at    | 3hISvsC_up_Common         | PGK1                | 1.28                         | 1.34                             | Xq13              | phosphoglycerate kinase 1                                                  | Hs.78771   |
| 200821_at    | 3hISvsC_up_Common         | LAMP2               | 1.33                         | 1.37                             | Xq24              | lysosomal-associated membrane protein 2                                    | Hs.496684  |
| 201099_at    | 3hISvsC_up_Common         | USP9X               | 1.34                         | 1.29                             | Xp11.4            | ubiquitin specific peptidase 9, X-linkec                                   | Hs.77578   |
| 201132_at    | 3hISvsC_up_Common         | HNRNPH2             | 1.34                         | 1.41                             | Xq22              | heterogeneous nuclear ribonucleoprotein H2 (H <sup>+</sup> )               | Hs.632828  |
| 201136_at    | 3hISvsC_up_Common         | PLP2                | 1.32                         | 1.34                             | Xp11.23           | proteolipid protein 2 (colonic epithelium-enriched)                        | Hs.77422   |
| 201406_at    | 3hISvsC_up_Common         | RPL36A              | 1.74                         | 1.69                             | Xq22.1            | ribosomal protein L36a                                                     | Hs.432485  |
| 202110_at    | 3hISvsC_up_Common         | COX7B               | 1.79                         | 1.81                             | Xq21.1            | cytochrome c oxidase subunit VIIb                                          | Hs.522699  |
| 202298_at    | 3hISvsC_up_Common         | NDUFA1              | 1.42                         | 1.31                             | Xq24              | NADH dehydrogenase (ubiquinone) 1 alpha subcomplex, 1, 7.5kDa              | Hs.534168  |
| 203042_at    | 3hISvsC_up_Common         | LAMP2               | 1.30                         | 1.39                             | Xq24              | lysosomal-associated membrane protein 2                                    | Hs.496684  |
| 206464_at    | 3hISvsC_up_Common         | BMX                 | 2.42                         | 3.40                             | Xp22.2            | BMX non-receptor tyrosine kinase                                           | Hs.495731  |
| 217383_at    | 3hISvsC_up_Common         | PGK1                | 1.28                         | 1.34                             | Xq13              | Phosphoglycerate kinase 1                                                  | Hs.78771   |
| 218163_at    | 3hISvsC_up_Common         | MCTS1               | 1.33                         | 1.27                             | Xq22-q24          | malignant T cell amplified sequence 1                                      | Hs.102696  |
| 219283_at    | 3hISvsC_up_Common         | C1GALT1C1           | 1.44                         | 1.38                             | Xq24              | C1GALT1-specific chaperone 1                                               | Hs.643920  |
| 220832_at    | 3hISvsC_up_Common         | TLR8                | 1.32                         | 1.34                             | Xp22              | toll-like receptor 8                                                       | Hs.660543  |
| 221895_at    | 3hISvsC_up_Common         | MOSPD2              | 1.32                         | 1.31                             | Xp22.2            | motile sperm domain containing 2                                           | Hs.190043  |
| 222815_at    | 3hISvsC_up_Common         | RNF12               | 1.31                         | 1.33                             | Xq13-q21          | ring finger protein, LIM domain interacting                                | Hs.653288  |
| 223439_at    | 3hISvsC_up_Common         | NKAP                | 1.27                         | 1.25                             | Xq24              | NFKB activating protein                                                    | Hs.522771  |
| 225154_at    | 3hISvsC_up_Common         | SYAP1               | 1.32                         | 1.39                             | Xp22.2            | synapse associated protein 1, SAP47 homolog (Drosophila)                   | Hs.489336  |
| 226671_at    | 3hISvsC_up_Common         | LAMP2               | 1.60                         | 1.57                             | Xq24              | lysosomal-associated membrane protein 2                                    | Hs.496684  |
| 226875_at    | 3hISvsC_up_Common         | DOCK11              | 1.26                         | 1.25                             | Xq24              | dedicator of cytokinesis 11                                                | Hs.368203  |
| 227357_at    | 3hISvsC_up_Common         | MAP3K7IP3           | 1.43                         | 1.34                             | Xp21.2            | TGF-beta activated kinase 1/MAP3K7 binding protein 3                       | Hs.188256  |
| 227425_at    | 3hISvsC_up_Common         | REPS2               | 1.73                         | 1.77                             | Xp22.2-p22.13     | RALBP1 associated Eps domain containing 2                                  | Hs.186810  |
| 229560_at    | 3hISvsC_up_Common         | TLR8                | 1.30                         | 1.47                             | Xp22              | toll-like receptor 8                                                       | Hs.660543  |
| 230532_at    | 3hISvsC_up_Common         | CXorf38             | 1.41                         | 1.27                             | Xp11.4            | chromosome X open reading frame 38                                         | Hs.495961  |
| 233082_at    | 3hISvsC_up_Common         | ZNF182 /// ZNF630   | 1.95                         | 1.80                             | Xp11.3-p11.1      | zinc finger protein 630                                                    | Hs.650883  |
| 243201_at    | 3hISvsC_up_Common         | HNRNPH2             | 1.48                         | 1.33                             | Xq22              | Heterogeneous nuclear ribonucleoprotein H2 (H <sup>+</sup> )               | Hs.632828  |
| 64883_at     | 3hISvsC_up_Common         | MOSPD2              | 1.46                         | 1.40                             | Xp22.2            | motile sperm domain containing 2                                           | Hs.190043  |
| 1555590_a_at | 3hISvsC_down_MaleSpecific | GATA1               | -1.70                        | NA                               | Xp11.23           | GATA binding protein 1 (globin transcription factor 1)                     | Hs.765     |
| 202219_at    | 3hISvsC_down_MaleSpecific | SLC6A8              | -1.82                        | NA                               | Xq28              | solute carrier family 6 (neurotransmitter transporter, creatine), member 8 | Hs.540696  |
| 202711_at    | 3hISvsC_down_MaleSpecific | EFNB1               | -1.25                        | NA                               | Xq12              | ephrin-B1                                                                  | Hs.144700  |
| 206868_at    | 3hISvsC_down_MaleSpecific | STARDB8             | -1.20                        | NA                               | Xq13.1            | STAR-related lipid transfer (START) domain containing 8                    | Hs.95140   |
| 210446_at    | 3hISvsC_down_MaleSpecific | GATA1               | -1.52                        | NA                               | Xp11.23           | GATA binding protein 1 (globin transcription factor 1)                     | Hs.765     |
| 219814_at    | 3hISvsC_down_MaleSpecific | MBNL3               | -1.54                        | NA                               | Xq26.2            | muscleblind-like 3 (Drosophila)                                            | Hs.105134  |

|              |                             |                      |       |       |                      |                                                                                        |           |
|--------------|-----------------------------|----------------------|-------|-------|----------------------|----------------------------------------------------------------------------------------|-----------|
| 1552671_a_at | 3hISvsC_down_FemaleSpecific | SLC9A7               | NA    | -1.27 | Xp11.3-p11.23 Xp11.3 | solute carrier family 9 (sodium/hydrogen exchanger), member 7                          | Hs.496057 |
| 1552882_a_at | 3hISvsC_down_FemaleSpecific | FAM123B              | NA    | -1.50 | Xq11.2               | family with sequence similarity 123E                                                   | Hs.314225 |
| 1553998_at   | 3hISvsC_down_FemaleSpecific | DMRTC1 /// LOC728656 | NA    | -1.75 | Xq13.2               | DMRT-like family C1 /// DMRT-like family C1E                                           | Hs.712728 |
| 1555882_at   | 3hISvsC_down_FemaleSpecific | SPIN3                | NA    | -1.40 | Xp11.21              | spindlin family, member 3                                                              | Hs.522672 |
| 1561660_at   | 3hISvsC_down_FemaleSpecific | MCART6               | NA    | -1.96 | Xq22.2               | mitochondrial carrier triple repeat 6                                                  | Hs.660022 |
| 201540_at    | 3hISvsC_down_FemaleSpecific | FHL1                 | NA    | -1.35 | Xq26                 | four and a half LIM domains 1                                                          | Hs.435369 |
| 209167_at    | 3hISvsC_down_FemaleSpecific | GPM6B                | NA    | -1.68 | Xp22.2               | glycoprotein M6B                                                                       | Hs.495710 |
| 213289_at    | 3hISvsC_down_FemaleSpecific | APOOL                | NA    | -1.58 | Xq21.1               | Apolipoprotein O-like                                                                  | Hs.512181 |
| 214607_at    | 3hISvsC_down_FemaleSpecific | PAK3                 | NA    | -1.64 | Xq23                 | p21 protein (Cdc42/Rac)-activated kinase 3                                             | Hs.656789 |
| 218012_at    | 3hISvsC_down_FemaleSpecific | TSPYL2               | NA    | -1.29 | Xp11.2               | TSPY-like 2                                                                            | Hs.136164 |
| 223915_at    | 3hISvsC_down_FemaleSpecific | BCOR                 | NA    | -1.37 | Xp21.2-p11.4         | BCL6 co-repressor                                                                      | Hs.659681 |
| 224589_at    | 3hISvsC_down_FemaleSpecific | XIST                 | NA    | -1.48 | Xq13.2               | X (inactive)-specific transcript (non-protein coding)                                  | ---       |
| 225028_at    | 3hISvsC_down_FemaleSpecific | LOC550643            | NA    | -1.50 | Xp11.1               | hypothetical LOC550643                                                                 | Hs.355559 |
| 225382_at    | 3hISvsC_down_FemaleSpecific | ZNF275               | NA    | -1.23 | Xq28                 | zinc finger protein 275                                                                | Hs.348963 |
| 225383_at    | 3hISvsC_down_FemaleSpecific | ZNF275               | NA    | -1.43 | Xq28                 | zinc finger protein 275                                                                | Hs.348963 |
| 228005_at    | 3hISvsC_down_FemaleSpecific | ZXDB                 | NA    | -1.44 | Xp11.21              | zinc finger, X-linked, duplicated B                                                    | Hs.156257 |
| 229234_at    | 3hISvsC_down_FemaleSpecific | ZC3H12B              | NA    | -1.46 | Xq12                 | zinc finger CCCH-type containing 12B                                                   | Hs.21249  |
| 229286_at    | 3hISvsC_down_FemaleSpecific | MAGEE1               | NA    | -1.55 | Xq13.3               | melanoma antigen family E, 1                                                           | Hs.8453   |
| 229365_at    | 3hISvsC_down_FemaleSpecific | PPP1R3F              | NA    | -1.34 | Xp11.23              | similar to protein phosphatase 1, regulatory (inhibitor) subunit 3F /// protein phosph | Hs.433652 |
| 230224_at    | 3hISvsC_down_FemaleSpecific | ZCCHC18              | NA    | -1.54 | Xq22.2               | zinc finger, CCHC domain containing 18                                                 | Hs.648338 |
| 235433_at    | 3hISvsC_down_FemaleSpecific | APOOL                | NA    | -1.53 | Xq21.1               | apolipoprotein O-like                                                                  | Hs.512181 |
| 235520_at    | 3hISvsC_down_FemaleSpecific | ZNF280C              | NA    | -1.51 | Xq26.1               | zinc finger protein 280C                                                               | Hs.308418 |
| 236294_at    | 3hISvsC_down_FemaleSpecific | HUWE1                | NA    | -1.29 | Xp11.22              | HECT, UBA and WWE domain containing 1                                                  | Hs.136905 |
| 239034_at    | 3hISvsC_down_FemaleSpecific | CXorf24              | NA    | -1.33 | Xp11.23              | chromosome X open reading frame 24                                                     | Hs.597617 |
| 243764_at    | 3hISvsC_down_FemaleSpecific | VSIG1                | NA    | -1.62 | Xq22.3               | V-set and immunoglobulin domain containing 1                                           | Hs.177164 |
| 32042_at     | 3hISvsC_down_FemaleSpecific | ENOX2                | NA    | -1.24 | Xq25-q26.2           | ecto-NOX disulfide-thiol exchanger 2                                                   | Hs.171458 |
| 204459_at    | 3hISvsC_down_Common         | CSTF2                | -1.25 | -1.26 | Xq22.1               | cleavage stimulation factor, 3' pre-RNA, subunit 2, 64kDa                              | Hs.132370 |
| 207681_at    | 3hISvsC_down_Common         | CXCR3                | -1.45 | -1.42 | Xq13                 | chemokine (C-X-C motif) receptor 3                                                     | Hs.198252 |
| 208723_at    | 3hISvsC_down_Common         | USP11                | -1.29 | -1.30 | Xp11.23              | ubiquitin specific peptidase 11                                                        | Hs.171501 |
| 209014_at    | 3hISvsC_down_Common         | MAGED1               | -1.31 | -1.28 | Xp11.23              | melanoma antigen family D, 1                                                           | Hs.5258   |
| 219433_at    | 3hISvsC_down_Common         | BCOR                 | -1.28 | -1.46 | Xp21.2-p11.4         | BCL6 co-repressor                                                                      | Hs.659681 |

# SUPPLEMENTAL MATERIAL

**Supplementary Table 1. Genes differential expressed between 3h ischemic stroke (3hIS) and non-stroke controls ( C) ( $\alpha \leq 0.05$ , fold change  $\geq |1.2|$ )**

| Probeset ID  | DE list                   | Gene Symbol         | Fold Change                  |                                  | Cytoband          | Gene Title                                                                 | UniGene ID |
|--------------|---------------------------|---------------------|------------------------------|----------------------------------|-------------------|----------------------------------------------------------------------------|------------|
|              |                           |                     | IS * Male vs. Control * Male | IS * Female vs. Control * Female |                   |                                                                            |            |
| 1553007_a_at | 3hISvsC_up_MaleSpecific   | ODZ1                | 1.38                         | NA                               | Xq25              | odz, odd Oz/ten-m homolog 1(Drosophila)                                    | Hs.23796   |
| 1554206_at   | 3hISvsC_up_MaleSpecific   | TMLHE               | 1.39                         | NA                               | Xq28              | trimethyllysine hydroxylase, epsilor                                       | Hs.133321  |
| 1559510_at   | 3hISvsC_up_MaleSpecific   | BHLHB9              | 1.51                         | NA                               | Xq23              | Basic helix-loop-helix domain containing, class B, 9                       | Hs.4276    |
| 201472_at    | 3hISvsC_up_MaleSpecific   | VBP1                | 1.35                         | NA                               | Xq28              | von Hippel-Lindau binding protein 1                                        | Hs.436803  |
| 202105_at    | 3hISvsC_up_MaleSpecific   | IGBP1               | 1.23                         | NA                               | Xq13.1-q13.3      | immunoglobulin (CD79A) binding protein 1                                   | Hs.496267  |
| 206696_at    | 3hISvsC_up_MaleSpecific   | GPR143              | 1.33                         | NA                               | Xp22.3            | G protein-coupled receptor 143                                             | Hs.74124   |
| 209022_at    | 3hISvsC_up_MaleSpecific   | STAG2               | 1.31                         | NA                               | Xq25              | stromal antigen 2                                                          | Hs.496710  |
| 214009_at    | 3hISvsC_up_MaleSpecific   | MSL3L1              | 1.40                         | NA                               | Xp22.3            | male-specific lethal 3 homolog (Drosophila)                                | Hs.655288  |
| 214681_at    | 3hISvsC_up_MaleSpecific   | GK                  | 1.51                         | NA                               | Xp21.3            | glycerol kinase                                                            | Hs.1466    |
| 219771_at    | 3hISvsC_up_MaleSpecific   | TBC1D8B             | 1.56                         | NA                               | Xq22.3            | TBC1 domain family, member 8B (with GRAM domain)                           | Hs.351798  |
| 226335_at    | 3hISvsC_up_MaleSpecific   | RPS6KA3             | 1.28                         | NA                               | Xp22.2-p22.1      | ribosomal protein S6 kinase, 90kDa, polypeptide 3                          | Hs.445387  |
| 228968_at    | 3hISvsC_up_MaleSpecific   | ZNF449              | 1.31                         | NA                               | Xq26.3            | zinc finger protein 449                                                    | Hs.28780   |
| 230866_at    | 3hISvsC_up_MaleSpecific   | CYSLTR1             | 1.39                         | NA                               | Xq13.2-q21.1      | cysteinyl leukotriene receptor 1                                           | Hs.201300  |
| 231747_at    | 3hISvsC_up_MaleSpecific   | CYSLTR1             | 1.23                         | NA                               | Xq13.2-q21.1      | cysteinyl leukotriene receptor 1                                           | Hs.201300  |
| 232087_at    | 3hISvsC_up_MaleSpecific   | CXorf23             | 1.61                         | NA                               | Xp22.12           | chromosome X open reading frame 23                                         | Hs.28896   |
| 232157_at    | 3hISvsC_up_MaleSpecific   | SPRY3               | 1.45                         | NA                               | Xq28 and Yq12     | sprouty homolog 3 (Drosophila)                                             | Hs.381912  |
| 236165_at    | 3hISvsC_up_MaleSpecific   | MSL3L1              | 1.48                         | NA                               | ---               | ---                                                                        | ---        |
| 238053_at    | 3hISvsC_up_MaleSpecific   | DHRX                | 1.44                         | NA                               | Xp22.33; Yp11.2   | dehydrogenase/reductase (SDR family) X-linkec                              | Hs.131452  |
| 238989_at    | 3hISvsC_up_MaleSpecific   | C1GALT1C1           | 1.44                         | NA                               | Xq24              | C1GALT1-specific chaperone 1                                               | Hs.643920  |
| 242931_at    | 3hISvsC_up_MaleSpecific   | LONRF3              | 1.38                         | NA                               | Xq24              | LON peptidase N-terminal domain and ring finger 3                          | Hs.144266  |
| 243683_at    | 3hISvsC_up_MaleSpecific   | MORF4L2             | 1.71                         | NA                               | Xq22              | Mortality factor 4 like 2                                                  | Hs.326387  |
| 244470_at    | 3hISvsC_up_MaleSpecific   | RNF12               | 1.27                         | NA                               | Xq13-q21          | Ring finger protein, LIM domain interacting                                | Hs.653288  |
| 1552927_at   | 3hISvsC_up_FemaleSpecific | MAP3K7IP3           | NA                           | 1.48                             | Xp21.2            | TGF-beta activated kinase 1/MAP3K7 binding protein 3                       | Hs.188256  |
| 1557726_at   | 3hISvsC_up_FemaleSpecific | ARMCX4              | NA                           | 1.21                             | Xq22.1            | armadillo repeat containing, X-linked 4                                    | Hs.9728    |
| 1557880_at   | 3hISvsC_up_FemaleSpecific | PCDH11X /// PCDH11Y | NA                           | 1.33                             | Xq21.3 /// Yp11.2 | protocadherin 11 X-linked /// protocadherin 11 Y-linkec                    | Hs.661308  |
| 1562805_at   | 3hISvsC_up_FemaleSpecific | LOC349408           | NA                           | 1.43                             | Xp22.31           | hypothetical LOC349408                                                     | Hs.685035  |
| 1565446_at   | 3hISvsC_up_FemaleSpecific | HPRT1               | NA                           | 1.22                             | Xq26.1            | Hypoxanthine phosphoribosyltransferase 1                                   | Hs.412707  |
| 201210_at    | 3hISvsC_up_FemaleSpecific | DDX3X               | NA                           | 1.20                             | Xp11.3-p11.23     | DEAD (Asp-Glu-Ala-Asp) box polypeptide 3, X-linkec                         | Hs.380774  |
| 201666_at    | 3hISvsC_up_FemaleSpecific | TIMP1               | NA                           | 1.29                             | Xp11.3-p11.23     | TIMP metalloproteinase inhibitor 1                                         | Hs.522632  |
| 205645_at    | 3hISvsC_up_FemaleSpecific | REPS2               | NA                           | 1.55                             | Xp22.2-p22.13     | RALBP1 associated Eps domain containing 2                                  | Hs.186810  |
| 206002_at    | 3hISvsC_up_FemaleSpecific | GPR64               | NA                           | 1.31                             | Xp22.13           | G protein-coupled receptor 64                                              | Hs.146978  |
| 210274_at    | 3hISvsC_up_FemaleSpecific | MAGEA8              | NA                           | 1.22                             | Xq28              | melanoma antigen family A, 8                                               | Hs.522803  |
| 212340_at    | 3hISvsC_up_FemaleSpecific | YIPF6               | NA                           | 1.45                             | Xq12              | Yip1 domain family, member 6                                               | Hs.82719   |
| 212457_at    | 3hISvsC_up_FemaleSpecific | TFE3                | NA                           | 1.22                             | Xp11.22           | transcription factor binding to IGHM enhancer 3                            | Hs.274184  |
| 212741_at    | 3hISvsC_up_FemaleSpecific | MAOA                | NA                           | 2.67                             | Xp11.3            | monoamine oxidase A                                                        | Hs.183109  |
| 216722_at    | 3hISvsC_up_FemaleSpecific | VENTXP1             | NA                           | 1.21                             | Xp21.3            | VENT homeobox (Xenopus laevis) pseudogene 1                                | Hs.447377  |
| 230030_at    | 3hISvsC_up_FemaleSpecific | HS6ST2              | NA                           | 1.28                             | Xq26.2            | heparan sulfate 6-O-sulfotransferase 2                                     | Hs.385956  |
| 244825_at    | 3hISvsC_up_FemaleSpecific | SHROOM4             | NA                           | 1.59                             | Xp11.22           | shroom family member 4                                                     | Hs.420541  |
| 200737_at    | 3hISvsC_up_Common         | PGK1                | 1.28                         | 1.34                             | Xq13              | phosphoglycerate kinase 1                                                  | Hs.78771   |
| 200821_at    | 3hISvsC_up_Common         | LAMP2               | 1.33                         | 1.37                             | Xq24              | lysosomal-associated membrane protein 2                                    | Hs.496684  |
| 201099_at    | 3hISvsC_up_Common         | USP9X               | 1.34                         | 1.29                             | Xp11.4            | ubiquitin specific peptidase 9, X-linkec                                   | Hs.77578   |
| 201132_at    | 3hISvsC_up_Common         | HNRNPH2             | 1.34                         | 1.41                             | Xq22              | heterogeneous nuclear ribonucleoprotein H2 (H <sup>2</sup> )               | Hs.632828  |
| 201136_at    | 3hISvsC_up_Common         | PLP2                | 1.32                         | 1.34                             | Xp11.23           | proteolipid protein 2 (colonic epithelium-enriched)                        | Hs.77422   |
| 201406_at    | 3hISvsC_up_Common         | RPL36A              | 1.74                         | 1.69                             | Xq22.1            | ribosomal protein L36a                                                     | Hs.432485  |
| 202110_at    | 3hISvsC_up_Common         | COX7B               | 1.79                         | 1.81                             | Xq21.1            | cytochrome c oxidase subunit VIIb                                          | Hs.522699  |
| 202298_at    | 3hISvsC_up_Common         | NDUFA1              | 1.42                         | 1.31                             | Xq24              | NADH dehydrogenase (ubiquinone) 1 alpha subcomplex, 1, 7.5kDa              | Hs.534168  |
| 203042_at    | 3hISvsC_up_Common         | LAMP2               | 1.30                         | 1.39                             | Xq24              | lysosomal-associated membrane protein 2                                    | Hs.496684  |
| 206464_at    | 3hISvsC_up_Common         | BMX                 | 2.42                         | 3.40                             | Xp22.2            | BMX non-receptor tyrosine kinase                                           | Hs.495731  |
| 217383_at    | 3hISvsC_up_Common         | PGK1                | 1.28                         | 1.34                             | Xq13              | Phosphoglycerate kinase 1                                                  | Hs.78771   |
| 218163_at    | 3hISvsC_up_Common         | MCTS1               | 1.33                         | 1.27                             | Xq22-q24          | malignant T cell amplified sequence 1                                      | Hs.102696  |
| 219283_at    | 3hISvsC_up_Common         | C1GALT1C1           | 1.44                         | 1.38                             | Xq24              | C1GALT1-specific chaperone 1                                               | Hs.643920  |
| 220832_at    | 3hISvsC_up_Common         | TLR8                | 1.32                         | 1.34                             | Xp22              | toll-like receptor 8                                                       | Hs.660543  |
| 221895_at    | 3hISvsC_up_Common         | MOSPD2              | 1.32                         | 1.31                             | Xp22.2            | motile sperm domain containing 2                                           | Hs.190043  |
| 222815_at    | 3hISvsC_up_Common         | RNF12               | 1.31                         | 1.33                             | Xq13-q21          | ring finger protein, LIM domain interacting                                | Hs.653288  |
| 223439_at    | 3hISvsC_up_Common         | NKAP                | 1.27                         | 1.25                             | Xq24              | NFKB activating protein                                                    | Hs.522771  |
| 225154_at    | 3hISvsC_up_Common         | SYAP1               | 1.32                         | 1.39                             | Xp22.2            | synapse associated protein 1, SAP47 homolog (Drosophila)                   | Hs.489336  |
| 226671_at    | 3hISvsC_up_Common         | LAMP2               | 1.60                         | 1.57                             | Xq24              | lysosomal-associated membrane protein 2                                    | Hs.496684  |
| 226875_at    | 3hISvsC_up_Common         | DOCK11              | 1.26                         | 1.25                             | Xq24              | dedicator of cytokinesis 11                                                | Hs.368203  |
| 227357_at    | 3hISvsC_up_Common         | MAP3K7IP3           | 1.43                         | 1.34                             | Xp21.2            | TGF-beta activated kinase 1/MAP3K7 binding protein 3                       | Hs.188256  |
| 227425_at    | 3hISvsC_up_Common         | REPS2               | 1.73                         | 1.77                             | Xp22.2-p22.13     | RALBP1 associated Eps domain containing 2                                  | Hs.186810  |
| 229560_at    | 3hISvsC_up_Common         | TLR8                | 1.30                         | 1.47                             | Xp22              | toll-like receptor 8                                                       | Hs.660543  |
| 230532_at    | 3hISvsC_up_Common         | CXorf38             | 1.41                         | 1.27                             | Xp11.4            | chromosome X open reading frame 38                                         | Hs.495961  |
| 233082_at    | 3hISvsC_up_Common         | ZNF182 /// ZNF630   | 1.95                         | 1.80                             | Xp11.3-p11.1      | zinc finger protein 630                                                    | Hs.650883  |
| 243201_at    | 3hISvsC_up_Common         | HNRNPH2             | 1.48                         | 1.33                             | Xq22              | Heterogeneous nuclear ribonucleoprotein H2 (H <sup>2</sup> )               | Hs.632828  |
| 64883_at     | 3hISvsC_up_Common         | MOSPD2              | 1.46                         | 1.40                             | Xp22.2            | motile sperm domain containing 2                                           | Hs.190043  |
| 1555590_a_at | 3hISvsC_down_MaleSpecific | GATA1               | -1.70                        | NA                               | Xp11.23           | GATA binding protein 1 (globin transcription factor 1)                     | Hs.765     |
| 202219_at    | 3hISvsC_down_MaleSpecific | SLC6A8              | -1.82                        | NA                               | Xq28              | solute carrier family 6 (neurotransmitter transporter, creatine), member 8 | Hs.540696  |
| 202711_at    | 3hISvsC_down_MaleSpecific | EFNB1               | -1.25                        | NA                               | Xq12              | ephrin-B1                                                                  | Hs.144700  |
| 206868_at    | 3hISvsC_down_MaleSpecific | STARDB8             | -1.20                        | NA                               | Xq13.1            | STAR-related lipid transfer (START) domain containing 8                    | Hs.95140   |
| 210446_at    | 3hISvsC_down_MaleSpecific | GATA1               | -1.52                        | NA                               | Xp11.23           | GATA binding protein 1 (globin transcription factor 1)                     | Hs.765     |
| 219814_at    | 3hISvsC_down_MaleSpecific | MBNL3               | -1.54                        | NA                               | Xq26.2            | muscleblind-like 3 (Drosophila)                                            | Hs.105134  |

|              |                             |                      |       |       |                      |                                                                                        |           |
|--------------|-----------------------------|----------------------|-------|-------|----------------------|----------------------------------------------------------------------------------------|-----------|
| 1552671_a_at | 3hISvsC_down_FemaleSpecific | SLC9A7               | NA    | -1.27 | Xp11.3-p11.23 Xp11.3 | solute carrier family 9 (sodium/hydrogen exchanger), member 7                          | Hs.496057 |
| 1552882_a_at | 3hISvsC_down_FemaleSpecific | FAM123B              | NA    | -1.50 | Xq11.2               | family with sequence similarity 123E                                                   | Hs.314225 |
| 1553998_at   | 3hISvsC_down_FemaleSpecific | DMRTC1 /// LOC728656 | NA    | -1.75 | Xq13.2               | DMRT-like family C1 /// DMRT-like family C1E                                           | Hs.712728 |
| 1555882_at   | 3hISvsC_down_FemaleSpecific | SPIN3                | NA    | -1.40 | Xp11.21              | spindlin family, member 3                                                              | Hs.522672 |
| 1561660_at   | 3hISvsC_down_FemaleSpecific | MCART6               | NA    | -1.96 | Xq22.2               | mitochondrial carrier triple repeat 6                                                  | Hs.660022 |
| 201540_at    | 3hISvsC_down_FemaleSpecific | FHL1                 | NA    | -1.35 | Xq26                 | four and a half LIM domains 1                                                          | Hs.435369 |
| 209167_at    | 3hISvsC_down_FemaleSpecific | GPM6B                | NA    | -1.68 | Xp22.2               | glycoprotein M6B                                                                       | Hs.495710 |
| 213289_at    | 3hISvsC_down_FemaleSpecific | APOOL                | NA    | -1.58 | Xq21.1               | Apolipoprotein O-like                                                                  | Hs.512181 |
| 214607_at    | 3hISvsC_down_FemaleSpecific | PAK3                 | NA    | -1.64 | Xq23                 | p21 protein (Cdc42/Rac)-activated kinase 3                                             | Hs.656789 |
| 218012_at    | 3hISvsC_down_FemaleSpecific | TSPYL2               | NA    | -1.29 | Xp11.2               | TSPY-like 2                                                                            | Hs.136164 |
| 223915_at    | 3hISvsC_down_FemaleSpecific | BCOR                 | NA    | -1.37 | Xp21.2-p11.4         | BCL6 co-repressor                                                                      | Hs.659681 |
| 224589_at    | 3hISvsC_down_FemaleSpecific | XIST                 | NA    | -1.48 | Xq13.2               | X (inactive)-specific transcript (non-protein coding)                                  | ---       |
| 225028_at    | 3hISvsC_down_FemaleSpecific | LOC550643            | NA    | -1.50 | Xp11.1               | hypothetical LOC550643                                                                 | Hs.355559 |
| 225382_at    | 3hISvsC_down_FemaleSpecific | ZNF275               | NA    | -1.23 | Xq28                 | zinc finger protein 275                                                                | Hs.348963 |
| 225383_at    | 3hISvsC_down_FemaleSpecific | ZNF275               | NA    | -1.43 | Xq28                 | zinc finger protein 275                                                                | Hs.348963 |
| 228005_at    | 3hISvsC_down_FemaleSpecific | ZXDB                 | NA    | -1.44 | Xp11.21              | zinc finger, X-linked, duplicated B                                                    | Hs.156257 |
| 229234_at    | 3hISvsC_down_FemaleSpecific | ZC3H12B              | NA    | -1.46 | Xq12                 | zinc finger CCCH-type containing 12B                                                   | Hs.21249  |
| 229286_at    | 3hISvsC_down_FemaleSpecific | MAGEE1               | NA    | -1.55 | Xq13.3               | melanoma antigen family E, 1                                                           | Hs.8453   |
| 229365_at    | 3hISvsC_down_FemaleSpecific | PPP1R3F              | NA    | -1.34 | Xp11.23              | similar to protein phosphatase 1, regulatory (inhibitor) subunit 3F /// protein phosph | Hs.433652 |
| 230224_at    | 3hISvsC_down_FemaleSpecific | ZCCHC18              | NA    | -1.54 | Xq22.2               | zinc finger, CCHC domain containing 18                                                 | Hs.648338 |
| 235433_at    | 3hISvsC_down_FemaleSpecific | APOOL                | NA    | -1.53 | Xq21.1               | apolipoprotein O-like                                                                  | Hs.512181 |
| 235520_at    | 3hISvsC_down_FemaleSpecific | ZNF280C              | NA    | -1.51 | Xq26.1               | zinc finger protein 280C                                                               | Hs.308418 |
| 236294_at    | 3hISvsC_down_FemaleSpecific | HUWE1                | NA    | -1.29 | Xp11.22              | HECT, UBA and WWE domain containing 1                                                  | Hs.136905 |
| 239034_at    | 3hISvsC_down_FemaleSpecific | CXorf24              | NA    | -1.33 | Xp11.23              | chromosome X open reading frame 24                                                     | Hs.597617 |
| 243764_at    | 3hISvsC_down_FemaleSpecific | VSIG1                | NA    | -1.62 | Xq22.3               | V-set and immunoglobulin domain containing 1                                           | Hs.177164 |
| 32042_at     | 3hISvsC_down_FemaleSpecific | ENOX2                | NA    | -1.24 | Xq25-q26.2           | ecto-NOX disulfide-thiol exchanger 2                                                   | Hs.171458 |
| 204459_at    | 3hISvsC_down_Common         | CSTF2                | -1.25 | -1.26 | Xq22.1               | cleavage stimulation factor, 3' pre-RNA, subunit 2, 64kDa                              | Hs.132370 |
| 207681_at    | 3hISvsC_down_Common         | CXCR3                | -1.45 | -1.42 | Xq13                 | chemokine (C-X-C motif) receptor 3                                                     | Hs.198252 |
| 208723_at    | 3hISvsC_down_Common         | USP11                | -1.29 | -1.30 | Xp11.23              | ubiquitin specific peptidase 11                                                        | Hs.171501 |
| 209014_at    | 3hISvsC_down_Common         | MAGED1               | -1.31 | -1.28 | Xp11.23              | melanoma antigen family D, 1                                                           | Hs.5258   |
| 219433_at    | 3hISvsC_down_Common         | BCOR                 | -1.28 | -1.46 | Xp21.2-p11.4         | BCL6 co-repressor                                                                      | Hs.659681 |

# SUPPLEMENTAL MATERIAL

**Supplementary Table 1. Genes differential expressed between 3h ischemic stroke (3hIS) and non-stroke controls ( C) ( $\alpha \leq 0.05$ , fold change  $\geq |1.2|$ )**

| Probeset ID  | DE list                   | Gene Symbol         | Fold Change                  |                                  | Cytoband          | Gene Title                                                                 | UniGene ID |
|--------------|---------------------------|---------------------|------------------------------|----------------------------------|-------------------|----------------------------------------------------------------------------|------------|
|              |                           |                     | IS * Male vs. Control * Male | IS * Female vs. Control * Female |                   |                                                                            |            |
| 1553007_a_at | 3hISvsC_up_MaleSpecific   | ODZ1                | 1.38                         | NA                               | Xq25              | odz, odd Oz/ten-m homolog 1(Drosophila)                                    | Hs.23796   |
| 1554206_at   | 3hISvsC_up_MaleSpecific   | TMLHE               | 1.39                         | NA                               | Xq28              | trimethyllysine hydroxylase, epsilor                                       | Hs.133321  |
| 1559510_at   | 3hISvsC_up_MaleSpecific   | BHLHB9              | 1.51                         | NA                               | Xq23              | Basic helix-loop-helix domain containing, class B, 9                       | Hs.4276    |
| 201472_at    | 3hISvsC_up_MaleSpecific   | VBP1                | 1.35                         | NA                               | Xq28              | von Hippel-Lindau binding protein 1                                        | Hs.436803  |
| 202105_at    | 3hISvsC_up_MaleSpecific   | IGBP1               | 1.23                         | NA                               | Xq13.1-q13.3      | immunoglobulin (CD79A) binding protein 1                                   | Hs.496267  |
| 206696_at    | 3hISvsC_up_MaleSpecific   | GPR143              | 1.33                         | NA                               | Xp22.3            | G protein-coupled receptor 143                                             | Hs.74124   |
| 209022_at    | 3hISvsC_up_MaleSpecific   | STAG2               | 1.31                         | NA                               | Xq25              | stromal antigen 2                                                          | Hs.496710  |
| 214009_at    | 3hISvsC_up_MaleSpecific   | MSL3L1              | 1.40                         | NA                               | Xp22.3            | male-specific lethal 3 homolog (Drosophila)                                | Hs.655288  |
| 214681_at    | 3hISvsC_up_MaleSpecific   | GK                  | 1.51                         | NA                               | Xp21.3            | glycerol kinase                                                            | Hs.1466    |
| 219771_at    | 3hISvsC_up_MaleSpecific   | TBC1D8B             | 1.56                         | NA                               | Xq22.3            | TBC1 domain family, member 8B (with GRAM domain)                           | Hs.351798  |
| 226335_at    | 3hISvsC_up_MaleSpecific   | RPS6KA3             | 1.28                         | NA                               | Xp22.2-p22.1      | ribosomal protein S6 kinase, 90kDa, polypeptide 3                          | Hs.445387  |
| 228968_at    | 3hISvsC_up_MaleSpecific   | ZNF449              | 1.31                         | NA                               | Xq26.3            | zinc finger protein 449                                                    | Hs.28780   |
| 230866_at    | 3hISvsC_up_MaleSpecific   | CYSLTR1             | 1.39                         | NA                               | Xq13.2-q21.1      | cysteinyl leukotriene receptor 1                                           | Hs.201300  |
| 231747_at    | 3hISvsC_up_MaleSpecific   | CYSLTR1             | 1.23                         | NA                               | Xq13.2-q21.1      | cysteinyl leukotriene receptor 1                                           | Hs.201300  |
| 232087_at    | 3hISvsC_up_MaleSpecific   | CXorf23             | 1.61                         | NA                               | Xp22.12           | chromosome X open reading frame 23                                         | Hs.28896   |
| 232157_at    | 3hISvsC_up_MaleSpecific   | SPRY3               | 1.45                         | NA                               | Xq28 and Yq12     | sprouty homolog 3 (Drosophila)                                             | Hs.381912  |
| 236165_at    | 3hISvsC_up_MaleSpecific   | MSL3L1              | 1.48                         | NA                               | ---               | ---                                                                        | ---        |
| 238053_at    | 3hISvsC_up_MaleSpecific   | DHRX                | 1.44                         | NA                               | Xp22.33; Yp11.2   | dehydrogenase/reductase (SDR family) X-linkec                              | Hs.131452  |
| 238989_at    | 3hISvsC_up_MaleSpecific   | C1GALT1C1           | 1.44                         | NA                               | Xq24              | C1GALT1-specific chaperone 1                                               | Hs.643920  |
| 242931_at    | 3hISvsC_up_MaleSpecific   | LONRF3              | 1.38                         | NA                               | Xq24              | LON peptidase N-terminal domain and ring finger 3                          | Hs.144266  |
| 243683_at    | 3hISvsC_up_MaleSpecific   | MORF4L2             | 1.71                         | NA                               | Xq22              | Mortality factor 4 like 2                                                  | Hs.326387  |
| 244470_at    | 3hISvsC_up_MaleSpecific   | RNF12               | 1.27                         | NA                               | Xq13-q21          | Ring finger protein, LIM domain interacting                                | Hs.653288  |
| 1552927_at   | 3hISvsC_up_FemaleSpecific | MAP3K7IP3           | NA                           | 1.48                             | Xp21.2            | TGF-beta activated kinase 1/MAP3K7 binding protein 3                       | Hs.188256  |
| 1557726_at   | 3hISvsC_up_FemaleSpecific | ARMCX4              | NA                           | 1.21                             | Xq22.1            | armadillo repeat containing, X-linked 4                                    | Hs.9728    |
| 1557880_at   | 3hISvsC_up_FemaleSpecific | PCDH11X /// PCDH11Y | NA                           | 1.33                             | Xq21.3 /// Yp11.2 | protocadherin 11 X-linked /// protocadherin 11 Y-linkec                    | Hs.661308  |
| 1562805_at   | 3hISvsC_up_FemaleSpecific | LOC349408           | NA                           | 1.43                             | Xp22.31           | hypothetical LOC349408                                                     | Hs.685035  |
| 1565446_at   | 3hISvsC_up_FemaleSpecific | HPRT1               | NA                           | 1.22                             | Xq26.1            | Hypoxanthine phosphoribosyltransferase 1                                   | Hs.412707  |
| 201210_at    | 3hISvsC_up_FemaleSpecific | DDX3X               | NA                           | 1.20                             | Xp11.3-p11.23     | DEAD (Asp-Glu-Ala-Asp) box polypeptide 3, X-linkec                         | Hs.380774  |
| 201666_at    | 3hISvsC_up_FemaleSpecific | TIMP1               | NA                           | 1.29                             | Xp11.3-p11.23     | TIMP metalloproteinase inhibitor 1                                         | Hs.522632  |
| 205645_at    | 3hISvsC_up_FemaleSpecific | REPS2               | NA                           | 1.55                             | Xp22.2-p22.13     | RALBP1 associated Eps domain containing 2                                  | Hs.186810  |
| 206002_at    | 3hISvsC_up_FemaleSpecific | GPR64               | NA                           | 1.31                             | Xp22.13           | G protein-coupled receptor 64                                              | Hs.146978  |
| 210274_at    | 3hISvsC_up_FemaleSpecific | MAGEA8              | NA                           | 1.22                             | Xq28              | melanoma antigen family A, 8                                               | Hs.522803  |
| 212340_at    | 3hISvsC_up_FemaleSpecific | YIPF6               | NA                           | 1.45                             | Xq12              | Yip1 domain family, member 6                                               | Hs.82719   |
| 212457_at    | 3hISvsC_up_FemaleSpecific | TFE3                | NA                           | 1.22                             | Xp11.22           | transcription factor binding to IGHM enhancer 3                            | Hs.274184  |
| 212741_at    | 3hISvsC_up_FemaleSpecific | MAOA                | NA                           | 2.67                             | Xp11.3            | monoamine oxidase A                                                        | Hs.183109  |
| 216722_at    | 3hISvsC_up_FemaleSpecific | VENTXP1             | NA                           | 1.21                             | Xp21.3            | VENT homeobox (Xenopus laevis) pseudogene 1                                | Hs.447377  |
| 230030_at    | 3hISvsC_up_FemaleSpecific | HS6ST2              | NA                           | 1.28                             | Xq26.2            | heparan sulfate 6-O-sulfotransferase 2                                     | Hs.385956  |
| 244825_at    | 3hISvsC_up_FemaleSpecific | SHROOM4             | NA                           | 1.59                             | Xp11.22           | shroom family member 4                                                     | Hs.420541  |
| 200737_at    | 3hISvsC_up_Common         | PGK1                | 1.28                         | 1.34                             | Xq13              | phosphoglycerate kinase 1                                                  | Hs.78771   |
| 200821_at    | 3hISvsC_up_Common         | LAMP2               | 1.33                         | 1.37                             | Xq24              | lysosomal-associated membrane protein 2                                    | Hs.496684  |
| 201099_at    | 3hISvsC_up_Common         | USP9X               | 1.34                         | 1.29                             | Xp11.4            | ubiquitin specific peptidase 9, X-linkec                                   | Hs.77578   |
| 201132_at    | 3hISvsC_up_Common         | HNRNPH2             | 1.34                         | 1.41                             | Xq22              | heterogeneous nuclear ribonucleoprotein H2 (H <sup>2</sup> )               | Hs.632828  |
| 201136_at    | 3hISvsC_up_Common         | PLP2                | 1.32                         | 1.34                             | Xp11.23           | proteolipid protein 2 (colonic epithelium-enriched)                        | Hs.77422   |
| 201406_at    | 3hISvsC_up_Common         | RPL36A              | 1.74                         | 1.69                             | Xq22.1            | ribosomal protein L36a                                                     | Hs.432485  |
| 202110_at    | 3hISvsC_up_Common         | COX7B               | 1.79                         | 1.81                             | Xq21.1            | cytochrome c oxidase subunit VIIb                                          | Hs.522699  |
| 202298_at    | 3hISvsC_up_Common         | NDUFA1              | 1.42                         | 1.31                             | Xq24              | NADH dehydrogenase (ubiquinone) 1 alpha subcomplex, 1, 7.5kDa              | Hs.534168  |
| 203042_at    | 3hISvsC_up_Common         | LAMP2               | 1.30                         | 1.39                             | Xq24              | lysosomal-associated membrane protein 2                                    | Hs.496684  |
| 206464_at    | 3hISvsC_up_Common         | BMX                 | 2.42                         | 3.40                             | Xp22.2            | BMX non-receptor tyrosine kinase                                           | Hs.495731  |
| 217383_at    | 3hISvsC_up_Common         | PGK1                | 1.28                         | 1.34                             | Xq13              | Phosphoglycerate kinase 1                                                  | Hs.78771   |
| 218163_at    | 3hISvsC_up_Common         | MCTS1               | 1.33                         | 1.27                             | Xq22-q24          | malignant T cell amplified sequence 1                                      | Hs.102696  |
| 219283_at    | 3hISvsC_up_Common         | C1GALT1C1           | 1.44                         | 1.38                             | Xq24              | C1GALT1-specific chaperone 1                                               | Hs.643920  |
| 220832_at    | 3hISvsC_up_Common         | TLR8                | 1.32                         | 1.34                             | Xp22              | toll-like receptor 8                                                       | Hs.660543  |
| 221895_at    | 3hISvsC_up_Common         | MOSPD2              | 1.32                         | 1.31                             | Xp22.2            | motile sperm domain containing 2                                           | Hs.190043  |
| 222815_at    | 3hISvsC_up_Common         | RNF12               | 1.31                         | 1.33                             | Xq13-q21          | ring finger protein, LIM domain interacting                                | Hs.653288  |
| 223439_at    | 3hISvsC_up_Common         | NKAP                | 1.27                         | 1.25                             | Xq24              | NFKB activating protein                                                    | Hs.522771  |
| 225154_at    | 3hISvsC_up_Common         | SYAP1               | 1.32                         | 1.39                             | Xp22.2            | synapse associated protein 1, SAP47 homolog (Drosophila)                   | Hs.489336  |
| 226671_at    | 3hISvsC_up_Common         | LAMP2               | 1.60                         | 1.57                             | Xq24              | lysosomal-associated membrane protein 2                                    | Hs.496684  |
| 226875_at    | 3hISvsC_up_Common         | DOCK11              | 1.26                         | 1.25                             | Xq24              | dedicator of cytokinesis 11                                                | Hs.368203  |
| 227357_at    | 3hISvsC_up_Common         | MAP3K7IP3           | 1.43                         | 1.34                             | Xp21.2            | TGF-beta activated kinase 1/MAP3K7 binding protein 3                       | Hs.188256  |
| 227425_at    | 3hISvsC_up_Common         | REPS2               | 1.73                         | 1.77                             | Xp22.2-p22.13     | RALBP1 associated Eps domain containing 2                                  | Hs.186810  |
| 229560_at    | 3hISvsC_up_Common         | TLR8                | 1.30                         | 1.47                             | Xp22              | toll-like receptor 8                                                       | Hs.660543  |
| 230532_at    | 3hISvsC_up_Common         | CXorf38             | 1.41                         | 1.27                             | Xp11.4            | chromosome X open reading frame 38                                         | Hs.495961  |
| 233082_at    | 3hISvsC_up_Common         | ZNF182 /// ZNF630   | 1.95                         | 1.80                             | Xp11.3-p11.1      | zinc finger protein 630                                                    | Hs.650883  |
| 243201_at    | 3hISvsC_up_Common         | HNRNPH2             | 1.48                         | 1.33                             | Xq22              | Heterogeneous nuclear ribonucleoprotein H2 (H <sup>2</sup> )               | Hs.632828  |
| 64883_at     | 3hISvsC_up_Common         | MOSPD2              | 1.46                         | 1.40                             | Xp22.2            | motile sperm domain containing 2                                           | Hs.190043  |
| 1555590_a_at | 3hISvsC_down_MaleSpecific | GATA1               | -1.70                        | NA                               | Xp11.23           | GATA binding protein 1 (globin transcription factor 1)                     | Hs.765     |
| 202219_at    | 3hISvsC_down_MaleSpecific | SLC6A8              | -1.82                        | NA                               | Xq28              | solute carrier family 6 (neurotransmitter transporter, creatine), member 8 | Hs.540696  |
| 202711_at    | 3hISvsC_down_MaleSpecific | EFNB1               | -1.25                        | NA                               | Xq12              | ephrin-B1                                                                  | Hs.144700  |
| 206868_at    | 3hISvsC_down_MaleSpecific | STARDB8             | -1.20                        | NA                               | Xq13.1            | STAR-related lipid transfer (START) domain containing 8                    | Hs.95140   |
| 210446_at    | 3hISvsC_down_MaleSpecific | GATA1               | -1.52                        | NA                               | Xp11.23           | GATA binding protein 1 (globin transcription factor 1)                     | Hs.765     |
| 219814_at    | 3hISvsC_down_MaleSpecific | MBNL3               | -1.54                        | NA                               | Xq26.2            | muscleblind-like 3 (Drosophila)                                            | Hs.105134  |

|              |                             |                      |       |       |                      |                                                                                        |           |
|--------------|-----------------------------|----------------------|-------|-------|----------------------|----------------------------------------------------------------------------------------|-----------|
| 1552671_a_at | 3hISvsC_down_FemaleSpecific | SLC9A7               | NA    | -1.27 | Xp11.3-p11.23 Xp11.3 | solute carrier family 9 (sodium/hydrogen exchanger), member 7                          | Hs.496057 |
| 1552882_a_at | 3hISvsC_down_FemaleSpecific | FAM123B              | NA    | -1.50 | Xq11.2               | family with sequence similarity 123E                                                   | Hs.314225 |
| 1553998_at   | 3hISvsC_down_FemaleSpecific | DMRTC1 /// LOC728656 | NA    | -1.75 | Xq13.2               | DMRT-like family C1 /// DMRT-like family C1E                                           | Hs.712728 |
| 1555882_at   | 3hISvsC_down_FemaleSpecific | SPIN3                | NA    | -1.40 | Xp11.21              | spindlin family, member 3                                                              | Hs.522672 |
| 1561660_at   | 3hISvsC_down_FemaleSpecific | MCART6               | NA    | -1.96 | Xq22.2               | mitochondrial carrier triple repeat 6                                                  | Hs.660022 |
| 201540_at    | 3hISvsC_down_FemaleSpecific | FHL1                 | NA    | -1.35 | Xq26                 | four and a half LIM domains 1                                                          | Hs.435369 |
| 209167_at    | 3hISvsC_down_FemaleSpecific | GPM6B                | NA    | -1.68 | Xp22.2               | glycoprotein M6B                                                                       | Hs.495710 |
| 213289_at    | 3hISvsC_down_FemaleSpecific | APOOL                | NA    | -1.58 | Xq21.1               | Apolipoprotein O-like                                                                  | Hs.512181 |
| 214607_at    | 3hISvsC_down_FemaleSpecific | PAK3                 | NA    | -1.64 | Xq23                 | p21 protein (Cdc42/Rac)-activated kinase 3                                             | Hs.656789 |
| 218012_at    | 3hISvsC_down_FemaleSpecific | TSPYL2               | NA    | -1.29 | Xp11.2               | TSPY-like 2                                                                            | Hs.136164 |
| 223915_at    | 3hISvsC_down_FemaleSpecific | BCOR                 | NA    | -1.37 | Xp21.2-p11.4         | BCL6 co-repressor                                                                      | Hs.659681 |
| 224589_at    | 3hISvsC_down_FemaleSpecific | XIST                 | NA    | -1.48 | Xq13.2               | X (inactive)-specific transcript (non-protein coding)                                  | ---       |
| 225028_at    | 3hISvsC_down_FemaleSpecific | LOC550643            | NA    | -1.50 | Xp11.1               | hypothetical LOC550643                                                                 | Hs.355559 |
| 225382_at    | 3hISvsC_down_FemaleSpecific | ZNF275               | NA    | -1.23 | Xq28                 | zinc finger protein 275                                                                | Hs.348963 |
| 225383_at    | 3hISvsC_down_FemaleSpecific | ZNF275               | NA    | -1.43 | Xq28                 | zinc finger protein 275                                                                | Hs.348963 |
| 228005_at    | 3hISvsC_down_FemaleSpecific | ZXDB                 | NA    | -1.44 | Xp11.21              | zinc finger, X-linked, duplicated B                                                    | Hs.156257 |
| 229234_at    | 3hISvsC_down_FemaleSpecific | ZC3H12B              | NA    | -1.46 | Xq12                 | zinc finger CCCH-type containing 12B                                                   | Hs.21249  |
| 229286_at    | 3hISvsC_down_FemaleSpecific | MAGEE1               | NA    | -1.55 | Xq13.3               | melanoma antigen family E, 1                                                           | Hs.8453   |
| 229365_at    | 3hISvsC_down_FemaleSpecific | PPP1R3F              | NA    | -1.34 | Xp11.23              | similar to protein phosphatase 1, regulatory (inhibitor) subunit 3F /// protein phosph | Hs.433652 |
| 230224_at    | 3hISvsC_down_FemaleSpecific | ZCCHC18              | NA    | -1.54 | Xq22.2               | zinc finger, CCHC domain containing 18                                                 | Hs.648338 |
| 235433_at    | 3hISvsC_down_FemaleSpecific | APOOL                | NA    | -1.53 | Xq21.1               | apolipoprotein O-like                                                                  | Hs.512181 |
| 235520_at    | 3hISvsC_down_FemaleSpecific | ZNF280C              | NA    | -1.51 | Xq26.1               | zinc finger protein 280C                                                               | Hs.308418 |
| 236294_at    | 3hISvsC_down_FemaleSpecific | HUWE1                | NA    | -1.29 | Xp11.22              | HECT, UBA and WWE domain containing 1                                                  | Hs.136905 |
| 239034_at    | 3hISvsC_down_FemaleSpecific | CXorf24              | NA    | -1.33 | Xp11.23              | chromosome X open reading frame 24                                                     | Hs.597617 |
| 243764_at    | 3hISvsC_down_FemaleSpecific | VSIG1                | NA    | -1.62 | Xq22.3               | V-set and immunoglobulin domain containing 1                                           | Hs.177164 |
| 32042_at     | 3hISvsC_down_FemaleSpecific | ENOX2                | NA    | -1.24 | Xq25-q26.2           | ecto-NOX disulfide-thiol exchanger 2                                                   | Hs.171458 |
| 204459_at    | 3hISvsC_down_Common         | CSTF2                | -1.25 | -1.26 | Xq22.1               | cleavage stimulation factor, 3' pre-RNA, subunit 2, 64kDa                              | Hs.132370 |
| 207681_at    | 3hISvsC_down_Common         | CXCR3                | -1.45 | -1.42 | Xq13                 | chemokine (C-X-C motif) receptor 3                                                     | Hs.198252 |
| 208723_at    | 3hISvsC_down_Common         | USP11                | -1.29 | -1.30 | Xp11.23              | ubiquitin specific peptidase 11                                                        | Hs.171501 |
| 209014_at    | 3hISvsC_down_Common         | MAGED1               | -1.31 | -1.28 | Xp11.23              | melanoma antigen family D, 1                                                           | Hs.5258   |
| 219433_at    | 3hISvsC_down_Common         | BCOR                 | -1.28 | -1.46 | Xp21.2-p11.4         | BCL6 co-repressor                                                                      | Hs.659681 |

# SUPPLEMENTAL MATERIAL

**Supplementary Table 1. Genes differential expressed between 3h ischemic stroke (3hIS) and non-stroke controls ( C) ( $\alpha \leq 0.05$ , fold change  $\geq |1.2|$ )**

| Probeset ID  | DE list                   | Gene Symbol         | Fold Change                  |                                  | Cytoband          | Gene Title                                                                 | UniGene ID |
|--------------|---------------------------|---------------------|------------------------------|----------------------------------|-------------------|----------------------------------------------------------------------------|------------|
|              |                           |                     | IS * Male vs. Control * Male | IS * Female vs. Control * Female |                   |                                                                            |            |
| 1553007_a_at | 3hISvsC_up_MaleSpecific   | ODZ1                | 1.38                         | NA                               | Xq25              | odz, odd Oz/ten-m homolog 1(Drosophila)                                    | Hs.23796   |
| 1554206_at   | 3hISvsC_up_MaleSpecific   | TMLHE               | 1.39                         | NA                               | Xq28              | trimethyllysine hydroxylase, epsilor                                       | Hs.133321  |
| 1559510_at   | 3hISvsC_up_MaleSpecific   | BHLHB9              | 1.51                         | NA                               | Xq23              | Basic helix-loop-helix domain containing, class B, 9                       | Hs.4276    |
| 201472_at    | 3hISvsC_up_MaleSpecific   | VBP1                | 1.35                         | NA                               | Xq28              | von Hippel-Lindau binding protein 1                                        | Hs.436803  |
| 202105_at    | 3hISvsC_up_MaleSpecific   | IGBP1               | 1.23                         | NA                               | Xq13.1-q13.3      | immunoglobulin (CD79A) binding protein 1                                   | Hs.496267  |
| 206696_at    | 3hISvsC_up_MaleSpecific   | GPR143              | 1.33                         | NA                               | Xp22.3            | G protein-coupled receptor 143                                             | Hs.74124   |
| 209022_at    | 3hISvsC_up_MaleSpecific   | STAG2               | 1.31                         | NA                               | Xq25              | stromal antigen 2                                                          | Hs.496710  |
| 214009_at    | 3hISvsC_up_MaleSpecific   | MSL3L1              | 1.40                         | NA                               | Xp22.3            | male-specific lethal 3 homolog (Drosophila)                                | Hs.655288  |
| 214681_at    | 3hISvsC_up_MaleSpecific   | GK                  | 1.51                         | NA                               | Xp21.3            | glycerol kinase                                                            | Hs.1466    |
| 219771_at    | 3hISvsC_up_MaleSpecific   | TBC1D8B             | 1.56                         | NA                               | Xq22.3            | TBC1 domain family, member 8B (with GRAM domain)                           | Hs.351798  |
| 226335_at    | 3hISvsC_up_MaleSpecific   | RPS6KA3             | 1.28                         | NA                               | Xp22.2-p22.1      | ribosomal protein S6 kinase, 90kDa, polypeptide 3                          | Hs.445387  |
| 228968_at    | 3hISvsC_up_MaleSpecific   | ZNF449              | 1.31                         | NA                               | Xq26.3            | zinc finger protein 449                                                    | Hs.28780   |
| 230866_at    | 3hISvsC_up_MaleSpecific   | CYSLTR1             | 1.39                         | NA                               | Xq13.2-q21.1      | cysteinyl leukotriene receptor 1                                           | Hs.201300  |
| 231747_at    | 3hISvsC_up_MaleSpecific   | CYSLTR1             | 1.23                         | NA                               | Xq13.2-q21.1      | cysteinyl leukotriene receptor 1                                           | Hs.201300  |
| 232087_at    | 3hISvsC_up_MaleSpecific   | CXorf23             | 1.61                         | NA                               | Xp22.12           | chromosome X open reading frame 23                                         | Hs.28896   |
| 232157_at    | 3hISvsC_up_MaleSpecific   | SPRY3               | 1.45                         | NA                               | Xq28 and Yq12     | sprouty homolog 3 (Drosophila)                                             | Hs.381912  |
| 236165_at    | 3hISvsC_up_MaleSpecific   | MSL3L1              | 1.48                         | NA                               | ---               | ---                                                                        | ---        |
| 238053_at    | 3hISvsC_up_MaleSpecific   | DHRX                | 1.44                         | NA                               | Xp22.33; Yp11.2   | dehydrogenase/reductase (SDR family) X-linkec                              | Hs.131452  |
| 238989_at    | 3hISvsC_up_MaleSpecific   | C1GALT1C1           | 1.44                         | NA                               | Xq24              | C1GALT1-specific chaperone 1                                               | Hs.643920  |
| 242931_at    | 3hISvsC_up_MaleSpecific   | LONRF3              | 1.38                         | NA                               | Xq24              | LON peptidase N-terminal domain and ring finger 3                          | Hs.144266  |
| 243683_at    | 3hISvsC_up_MaleSpecific   | MORF4L2             | 1.71                         | NA                               | Xq22              | Mortality factor 4 like 2                                                  | Hs.326387  |
| 244470_at    | 3hISvsC_up_MaleSpecific   | RNF12               | 1.27                         | NA                               | Xq13-q21          | Ring finger protein, LIM domain interacting                                | Hs.653288  |
| 1552927_at   | 3hISvsC_up_FemaleSpecific | MAP3K7IP3           | NA                           | 1.48                             | Xp21.2            | TGF-beta activated kinase 1/MAP3K7 binding protein 3                       | Hs.188256  |
| 1557726_at   | 3hISvsC_up_FemaleSpecific | ARMCX4              | NA                           | 1.21                             | Xq22.1            | armadillo repeat containing, X-linked 4                                    | Hs.9728    |
| 1557880_at   | 3hISvsC_up_FemaleSpecific | PCDH11X /// PCDH11Y | NA                           | 1.33                             | Xq21.3 /// Yp11.2 | protocadherin 11 X-linked /// protocadherin 11 Y-linkec                    | Hs.661308  |
| 1562805_at   | 3hISvsC_up_FemaleSpecific | LOC349408           | NA                           | 1.43                             | Xp22.31           | hypothetical LOC349408                                                     | Hs.685035  |
| 1565446_at   | 3hISvsC_up_FemaleSpecific | HPRT1               | NA                           | 1.22                             | Xq26.1            | Hypoxanthine phosphoribosyltransferase 1                                   | Hs.412707  |
| 201210_at    | 3hISvsC_up_FemaleSpecific | DDX3X               | NA                           | 1.20                             | Xp11.3-p11.23     | DEAD (Asp-Glu-Ala-Asp) box polypeptide 3, X-linkec                         | Hs.380774  |
| 201666_at    | 3hISvsC_up_FemaleSpecific | TIMP1               | NA                           | 1.29                             | Xp11.3-p11.23     | TIMP metalloproteinase inhibitor 1                                         | Hs.522632  |
| 205645_at    | 3hISvsC_up_FemaleSpecific | REPS2               | NA                           | 1.55                             | Xp22.2-p22.13     | RALBP1 associated Eps domain containing 2                                  | Hs.186810  |
| 206002_at    | 3hISvsC_up_FemaleSpecific | GPR64               | NA                           | 1.31                             | Xp22.13           | G protein-coupled receptor 64                                              | Hs.146978  |
| 210274_at    | 3hISvsC_up_FemaleSpecific | MAGEA8              | NA                           | 1.22                             | Xq28              | melanoma antigen family A, 8                                               | Hs.522803  |
| 212340_at    | 3hISvsC_up_FemaleSpecific | YIPF6               | NA                           | 1.45                             | Xq12              | Yip1 domain family, member 6                                               | Hs.82719   |
| 212457_at    | 3hISvsC_up_FemaleSpecific | TFE3                | NA                           | 1.22                             | Xp11.22           | transcription factor binding to IGHM enhancer 3                            | Hs.274184  |
| 212741_at    | 3hISvsC_up_FemaleSpecific | MAOA                | NA                           | 2.67                             | Xp11.3            | monoamine oxidase A                                                        | Hs.183109  |
| 216722_at    | 3hISvsC_up_FemaleSpecific | VENTXP1             | NA                           | 1.21                             | Xp21.3            | VENT homeobox (Xenopus laevis) pseudogene 1                                | Hs.447377  |
| 230030_at    | 3hISvsC_up_FemaleSpecific | HS6ST2              | NA                           | 1.28                             | Xq26.2            | heparan sulfate 6-O-sulfotransferase 2                                     | Hs.385956  |
| 244825_at    | 3hISvsC_up_FemaleSpecific | SHROOM4             | NA                           | 1.59                             | Xp11.22           | shroom family member 4                                                     | Hs.420541  |
| 200737_at    | 3hISvsC_up_Common         | PGK1                | 1.28                         | 1.34                             | Xq13              | phosphoglycerate kinase 1                                                  | Hs.78771   |
| 200821_at    | 3hISvsC_up_Common         | LAMP2               | 1.33                         | 1.37                             | Xq24              | lysosomal-associated membrane protein 2                                    | Hs.496684  |
| 201099_at    | 3hISvsC_up_Common         | USP9X               | 1.34                         | 1.29                             | Xp11.4            | ubiquitin specific peptidase 9, X-linkec                                   | Hs.77578   |
| 201132_at    | 3hISvsC_up_Common         | HNRNPH2             | 1.34                         | 1.41                             | Xq22              | heterogeneous nuclear ribonucleoprotein H2 (H <sup>2</sup> )               | Hs.632828  |
| 201136_at    | 3hISvsC_up_Common         | PLP2                | 1.32                         | 1.34                             | Xp11.23           | proteolipid protein 2 (colonic epithelium-enriched)                        | Hs.77422   |
| 201406_at    | 3hISvsC_up_Common         | RPL36A              | 1.74                         | 1.69                             | Xq22.1            | ribosomal protein L36a                                                     | Hs.432485  |
| 202110_at    | 3hISvsC_up_Common         | COX7B               | 1.79                         | 1.81                             | Xq21.1            | cytochrome c oxidase subunit VIIb                                          | Hs.522699  |
| 202298_at    | 3hISvsC_up_Common         | NDUFA1              | 1.42                         | 1.31                             | Xq24              | NADH dehydrogenase (ubiquinone) 1 alpha subcomplex, 1, 7.5kDa              | Hs.534168  |
| 203042_at    | 3hISvsC_up_Common         | LAMP2               | 1.30                         | 1.39                             | Xq24              | lysosomal-associated membrane protein 2                                    | Hs.496684  |
| 206464_at    | 3hISvsC_up_Common         | BMX                 | 2.42                         | 3.40                             | Xp22.2            | BMX non-receptor tyrosine kinase                                           | Hs.495731  |
| 217383_at    | 3hISvsC_up_Common         | PGK1                | 1.28                         | 1.34                             | Xq13              | Phosphoglycerate kinase 1                                                  | Hs.78771   |
| 218163_at    | 3hISvsC_up_Common         | MCTS1               | 1.33                         | 1.27                             | Xq22-q24          | malignant T cell amplified sequence 1                                      | Hs.102696  |
| 219283_at    | 3hISvsC_up_Common         | C1GALT1C1           | 1.44                         | 1.38                             | Xq24              | C1GALT1-specific chaperone 1                                               | Hs.643920  |
| 220832_at    | 3hISvsC_up_Common         | TLR8                | 1.32                         | 1.34                             | Xp22              | toll-like receptor 8                                                       | Hs.660543  |
| 221895_at    | 3hISvsC_up_Common         | MOSPD2              | 1.32                         | 1.31                             | Xp22.2            | motile sperm domain containing 2                                           | Hs.190043  |
| 222815_at    | 3hISvsC_up_Common         | RNF12               | 1.31                         | 1.33                             | Xq13-q21          | ring finger protein, LIM domain interacting                                | Hs.653288  |
| 223439_at    | 3hISvsC_up_Common         | NKAP                | 1.27                         | 1.25                             | Xq24              | NFKB activating protein                                                    | Hs.522771  |
| 225154_at    | 3hISvsC_up_Common         | SYAP1               | 1.32                         | 1.39                             | Xp22.2            | synapse associated protein 1, SAP47 homolog (Drosophila)                   | Hs.489336  |
| 226671_at    | 3hISvsC_up_Common         | LAMP2               | 1.60                         | 1.57                             | Xq24              | lysosomal-associated membrane protein 2                                    | Hs.496684  |
| 226875_at    | 3hISvsC_up_Common         | DOCK11              | 1.26                         | 1.25                             | Xq24              | dedicator of cytokinesis 11                                                | Hs.368203  |
| 227357_at    | 3hISvsC_up_Common         | MAP3K7IP3           | 1.43                         | 1.34                             | Xp21.2            | TGF-beta activated kinase 1/MAP3K7 binding protein 3                       | Hs.188256  |
| 227425_at    | 3hISvsC_up_Common         | REPS2               | 1.73                         | 1.77                             | Xp22.2-p22.13     | RALBP1 associated Eps domain containing 2                                  | Hs.186810  |
| 229560_at    | 3hISvsC_up_Common         | TLR8                | 1.30                         | 1.47                             | Xp22              | toll-like receptor 8                                                       | Hs.660543  |
| 230532_at    | 3hISvsC_up_Common         | CXorf38             | 1.41                         | 1.27                             | Xp11.4            | chromosome X open reading frame 38                                         | Hs.495961  |
| 233082_at    | 3hISvsC_up_Common         | ZNF182 /// ZNF630   | 1.95                         | 1.80                             | Xp11.3-p11.1      | zinc finger protein 630                                                    | Hs.650883  |
| 243201_at    | 3hISvsC_up_Common         | HNRNPH2             | 1.48                         | 1.33                             | Xq22              | Heterogeneous nuclear ribonucleoprotein H2 (H <sup>2</sup> )               | Hs.632828  |
| 64883_at     | 3hISvsC_up_Common         | MOSPD2              | 1.46                         | 1.40                             | Xp22.2            | motile sperm domain containing 2                                           | Hs.190043  |
| 1555590_a_at | 3hISvsC_down_MaleSpecific | GATA1               | -1.70                        | NA                               | Xp11.23           | GATA binding protein 1 (globin transcription factor 1)                     | Hs.765     |
| 202219_at    | 3hISvsC_down_MaleSpecific | SLC6A8              | -1.82                        | NA                               | Xq28              | solute carrier family 6 (neurotransmitter transporter, creatine), member 8 | Hs.540696  |
| 202711_at    | 3hISvsC_down_MaleSpecific | EFNB1               | -1.25                        | NA                               | Xq12              | ephrin-B1                                                                  | Hs.144700  |
| 206868_at    | 3hISvsC_down_MaleSpecific | STARDB8             | -1.20                        | NA                               | Xq13.1            | STAR-related lipid transfer (START) domain containing 8                    | Hs.95140   |
| 210446_at    | 3hISvsC_down_MaleSpecific | GATA1               | -1.52                        | NA                               | Xp11.23           | GATA binding protein 1 (globin transcription factor 1)                     | Hs.765     |
| 219814_at    | 3hISvsC_down_MaleSpecific | MBNL3               | -1.54                        | NA                               | Xq26.2            | muscleblind-like 3 (Drosophila)                                            | Hs.105134  |

|              |                             |                      |       |       |                      |                                                                                        |           |
|--------------|-----------------------------|----------------------|-------|-------|----------------------|----------------------------------------------------------------------------------------|-----------|
| 1552671_a_at | 3hISvsC_down_FemaleSpecific | SLC9A7               | NA    | -1.27 | Xp11.3-p11.23 Xp11.3 | solute carrier family 9 (sodium/hydrogen exchanger), member 7                          | Hs.496057 |
| 1552882_a_at | 3hISvsC_down_FemaleSpecific | FAM123B              | NA    | -1.50 | Xq11.2               | family with sequence similarity 123E                                                   | Hs.314225 |
| 1553998_at   | 3hISvsC_down_FemaleSpecific | DMRTC1 /// LOC728656 | NA    | -1.75 | Xq13.2               | DMRT-like family C1 /// DMRT-like family C1E                                           | Hs.712728 |
| 1555882_at   | 3hISvsC_down_FemaleSpecific | SPIN3                | NA    | -1.40 | Xp11.21              | spindlin family, member 3                                                              | Hs.522672 |
| 1561660_at   | 3hISvsC_down_FemaleSpecific | MCART6               | NA    | -1.96 | Xq22.2               | mitochondrial carrier triple repeat 6                                                  | Hs.660022 |
| 201540_at    | 3hISvsC_down_FemaleSpecific | FHL1                 | NA    | -1.35 | Xq26                 | four and a half LIM domains 1                                                          | Hs.435369 |
| 209167_at    | 3hISvsC_down_FemaleSpecific | GPM6B                | NA    | -1.68 | Xp22.2               | glycoprotein M6B                                                                       | Hs.495710 |
| 213289_at    | 3hISvsC_down_FemaleSpecific | APOOL                | NA    | -1.58 | Xq21.1               | Apolipoprotein O-like                                                                  | Hs.512181 |
| 214607_at    | 3hISvsC_down_FemaleSpecific | PAK3                 | NA    | -1.64 | Xq23                 | p21 protein (Cdc42/Rac)-activated kinase 3                                             | Hs.656789 |
| 218012_at    | 3hISvsC_down_FemaleSpecific | TSPYL2               | NA    | -1.29 | Xp11.2               | TSPY-like 2                                                                            | Hs.136164 |
| 223915_at    | 3hISvsC_down_FemaleSpecific | BCOR                 | NA    | -1.37 | Xp21.2-p11.4         | BCL6 co-repressor                                                                      | Hs.659681 |
| 224589_at    | 3hISvsC_down_FemaleSpecific | XIST                 | NA    | -1.48 | Xq13.2               | X (inactive)-specific transcript (non-protein coding)                                  | ---       |
| 225028_at    | 3hISvsC_down_FemaleSpecific | LOC550643            | NA    | -1.50 | Xp11.1               | hypothetical LOC550643                                                                 | Hs.355559 |
| 225382_at    | 3hISvsC_down_FemaleSpecific | ZNF275               | NA    | -1.23 | Xq28                 | zinc finger protein 275                                                                | Hs.348963 |
| 225383_at    | 3hISvsC_down_FemaleSpecific | ZNF275               | NA    | -1.43 | Xq28                 | zinc finger protein 275                                                                | Hs.348963 |
| 228005_at    | 3hISvsC_down_FemaleSpecific | ZXDB                 | NA    | -1.44 | Xp11.21              | zinc finger, X-linked, duplicated B                                                    | Hs.156257 |
| 229234_at    | 3hISvsC_down_FemaleSpecific | ZC3H12B              | NA    | -1.46 | Xq12                 | zinc finger CCCH-type containing 12B                                                   | Hs.21249  |
| 229286_at    | 3hISvsC_down_FemaleSpecific | MAGEE1               | NA    | -1.55 | Xq13.3               | melanoma antigen family E, 1                                                           | Hs.8453   |
| 229365_at    | 3hISvsC_down_FemaleSpecific | PPP1R3F              | NA    | -1.34 | Xp11.23              | similar to protein phosphatase 1, regulatory (inhibitor) subunit 3F /// protein phosph | Hs.433652 |
| 230224_at    | 3hISvsC_down_FemaleSpecific | ZCCHC18              | NA    | -1.54 | Xq22.2               | zinc finger, CCHC domain containing 18                                                 | Hs.648338 |
| 235433_at    | 3hISvsC_down_FemaleSpecific | APOOL                | NA    | -1.53 | Xq21.1               | apolipoprotein O-like                                                                  | Hs.512181 |
| 235520_at    | 3hISvsC_down_FemaleSpecific | ZNF280C              | NA    | -1.51 | Xq26.1               | zinc finger protein 280C                                                               | Hs.308418 |
| 236294_at    | 3hISvsC_down_FemaleSpecific | HUWE1                | NA    | -1.29 | Xp11.22              | HECT, UBA and WWE domain containing 1                                                  | Hs.136905 |
| 239034_at    | 3hISvsC_down_FemaleSpecific | CXorf24              | NA    | -1.33 | Xp11.23              | chromosome X open reading frame 24                                                     | Hs.597617 |
| 243764_at    | 3hISvsC_down_FemaleSpecific | VSIG1                | NA    | -1.62 | Xq22.3               | V-set and immunoglobulin domain containing 1                                           | Hs.177164 |
| 32042_at     | 3hISvsC_down_FemaleSpecific | ENOX2                | NA    | -1.24 | Xq25-q26.2           | ecto-NOX disulfide-thiol exchanger 2                                                   | Hs.171458 |
| 204459_at    | 3hISvsC_down_Common         | CSTF2                | -1.25 | -1.26 | Xq22.1               | cleavage stimulation factor, 3' pre-RNA, subunit 2, 64kDa                              | Hs.132370 |
| 207681_at    | 3hISvsC_down_Common         | CXCR3                | -1.45 | -1.42 | Xq13                 | chemokine (C-X-C motif) receptor 3                                                     | Hs.198252 |
| 208723_at    | 3hISvsC_down_Common         | USP11                | -1.29 | -1.30 | Xp11.23              | ubiquitin specific peptidase 11                                                        | Hs.171501 |
| 209014_at    | 3hISvsC_down_Common         | MAGED1               | -1.31 | -1.28 | Xp11.23              | melanoma antigen family D, 1                                                           | Hs.5258   |
| 219433_at    | 3hISvsC_down_Common         | BCOR                 | -1.28 | -1.46 | Xp21.2-p11.4         | BCL6 co-repressor                                                                      | Hs.659681 |



# SUPPLEMENTAL MATERIAL

**Supplementary Table 1. Genes differential expressed between 3h ischemic stroke (3hIS) and non-stroke controls ( C) ( $\alpha \leq 0.05$ , fold change  $\geq |1.2|$ )**

| Probeset ID  | DE list                   | Gene Symbol         | Fold Change                  |                                  | Cytoband          | Gene Title                                                                 | UniGene ID |
|--------------|---------------------------|---------------------|------------------------------|----------------------------------|-------------------|----------------------------------------------------------------------------|------------|
|              |                           |                     | IS * Male vs. Control * Male | IS * Female vs. Control * Female |                   |                                                                            |            |
| 1553007_a_at | 3hISvsC_up_MaleSpecific   | ODZ1                | 1.38                         | NA                               | Xq25              | odz, odd Oz/ten-m homolog 1(Drosophila)                                    | Hs.23796   |
| 1554206_at   | 3hISvsC_up_MaleSpecific   | TMLHE               | 1.39                         | NA                               | Xq28              | trimethyllysine hydroxylase, epsilor                                       | Hs.133321  |
| 1559510_at   | 3hISvsC_up_MaleSpecific   | BHLHB9              | 1.51                         | NA                               | Xq23              | Basic helix-loop-helix domain containing, class B, 9                       | Hs.4276    |
| 201472_at    | 3hISvsC_up_MaleSpecific   | VBP1                | 1.35                         | NA                               | Xq28              | von Hippel-Lindau binding protein 1                                        | Hs.436803  |
| 202105_at    | 3hISvsC_up_MaleSpecific   | IGBP1               | 1.23                         | NA                               | Xq13.1-q13.3      | immunoglobulin (CD79A) binding protein 1                                   | Hs.496267  |
| 206696_at    | 3hISvsC_up_MaleSpecific   | GPR143              | 1.33                         | NA                               | Xp22.3            | G protein-coupled receptor 143                                             | Hs.74124   |
| 209022_at    | 3hISvsC_up_MaleSpecific   | STAG2               | 1.31                         | NA                               | Xq25              | stromal antigen 2                                                          | Hs.496710  |
| 214009_at    | 3hISvsC_up_MaleSpecific   | MSL3L1              | 1.40                         | NA                               | Xp22.3            | male-specific lethal 3 homolog (Drosophila)                                | Hs.655288  |
| 214681_at    | 3hISvsC_up_MaleSpecific   | GK                  | 1.51                         | NA                               | Xp21.3            | glycerol kinase                                                            | Hs.1466    |
| 219771_at    | 3hISvsC_up_MaleSpecific   | TBC1D8B             | 1.56                         | NA                               | Xq22.3            | TBC1 domain family, member 8B (with GRAM domain)                           | Hs.351798  |
| 226335_at    | 3hISvsC_up_MaleSpecific   | RPS6KA3             | 1.28                         | NA                               | Xp22.2-p22.1      | ribosomal protein S6 kinase, 90kDa, polypeptide 3                          | Hs.445387  |
| 228968_at    | 3hISvsC_up_MaleSpecific   | ZNF449              | 1.31                         | NA                               | Xq26.3            | zinc finger protein 449                                                    | Hs.28780   |
| 230866_at    | 3hISvsC_up_MaleSpecific   | CYSLTR1             | 1.39                         | NA                               | Xq13.2-q21.1      | cysteinyl leukotriene receptor 1                                           | Hs.201300  |
| 231747_at    | 3hISvsC_up_MaleSpecific   | CYSLTR1             | 1.23                         | NA                               | Xq13.2-q21.1      | cysteinyl leukotriene receptor 1                                           | Hs.201300  |
| 232087_at    | 3hISvsC_up_MaleSpecific   | CXorf23             | 1.61                         | NA                               | Xp22.12           | chromosome X open reading frame 23                                         | Hs.28896   |
| 232157_at    | 3hISvsC_up_MaleSpecific   | SPRY3               | 1.45                         | NA                               | Xq28 and Yq12     | sprouty homolog 3 (Drosophila)                                             | Hs.381912  |
| 236165_at    | 3hISvsC_up_MaleSpecific   | MSL3L1              | 1.48                         | NA                               | ---               | ---                                                                        | ---        |
| 238053_at    | 3hISvsC_up_MaleSpecific   | DHRX                | 1.44                         | NA                               | Xp22.33; Yp11.2   | dehydrogenase/reductase (SDR family) X-linkec                              | Hs.131452  |
| 238989_at    | 3hISvsC_up_MaleSpecific   | C1GALT1C1           | 1.44                         | NA                               | Xq24              | C1GALT1-specific chaperone 1                                               | Hs.643920  |
| 242931_at    | 3hISvsC_up_MaleSpecific   | LONRF3              | 1.38                         | NA                               | Xq24              | LON peptidase N-terminal domain and ring finger 3                          | Hs.144266  |
| 243683_at    | 3hISvsC_up_MaleSpecific   | MORF4L2             | 1.71                         | NA                               | Xq22              | Mortality factor 4 like 2                                                  | Hs.326387  |
| 244470_at    | 3hISvsC_up_MaleSpecific   | RNF12               | 1.27                         | NA                               | Xq13-q21          | Ring finger protein, LIM domain interacting                                | Hs.653288  |
| 1552927_at   | 3hISvsC_up_FemaleSpecific | MAP3K7IP3           | NA                           | 1.48                             | Xp21.2            | TGF-beta activated kinase 1/MAP3K7 binding protein 3                       | Hs.188256  |
| 1557726_at   | 3hISvsC_up_FemaleSpecific | ARMCX4              | NA                           | 1.21                             | Xq22.1            | armadillo repeat containing, X-linked 4                                    | Hs.9728    |
| 1557880_at   | 3hISvsC_up_FemaleSpecific | PCDH11X /// PCDH11Y | NA                           | 1.33                             | Xq21.3 /// Yp11.2 | protocadherin 11 X-linked /// protocadherin 11 Y-linkec                    | Hs.661308  |
| 1562805_at   | 3hISvsC_up_FemaleSpecific | LOC349408           | NA                           | 1.43                             | Xp22.31           | hypothetical LOC349408                                                     | Hs.685035  |
| 1565446_at   | 3hISvsC_up_FemaleSpecific | HPRT1               | NA                           | 1.22                             | Xq26.1            | Hypoxanthine phosphoribosyltransferase 1                                   | Hs.412707  |
| 201210_at    | 3hISvsC_up_FemaleSpecific | DDX3X               | NA                           | 1.20                             | Xp11.3-p11.23     | DEAD (Asp-Glu-Ala-Asp) box polypeptide 3, X-linkec                         | Hs.380774  |
| 201666_at    | 3hISvsC_up_FemaleSpecific | TIMP1               | NA                           | 1.29                             | Xp11.3-p11.23     | TIMP metalloproteinase inhibitor 1                                         | Hs.522632  |
| 205645_at    | 3hISvsC_up_FemaleSpecific | REPS2               | NA                           | 1.55                             | Xp22.2-p22.13     | RALBP1 associated Eps domain containing 2                                  | Hs.186810  |
| 206002_at    | 3hISvsC_up_FemaleSpecific | GPR64               | NA                           | 1.31                             | Xp22.13           | G protein-coupled receptor 64                                              | Hs.146978  |
| 210274_at    | 3hISvsC_up_FemaleSpecific | MAGEA8              | NA                           | 1.22                             | Xq28              | melanoma antigen family A, 8                                               | Hs.522803  |
| 212340_at    | 3hISvsC_up_FemaleSpecific | YIPF6               | NA                           | 1.45                             | Xq12              | Yip1 domain family, member 6                                               | Hs.82719   |
| 212457_at    | 3hISvsC_up_FemaleSpecific | TFE3                | NA                           | 1.22                             | Xp11.22           | transcription factor binding to IGHM enhancer 3                            | Hs.274184  |
| 212741_at    | 3hISvsC_up_FemaleSpecific | MAOA                | NA                           | 2.67                             | Xp11.3            | monoamine oxidase A                                                        | Hs.183109  |
| 216722_at    | 3hISvsC_up_FemaleSpecific | VENTXP1             | NA                           | 1.21                             | Xp21.3            | VENT homeobox (Xenopus laevis) pseudogene 1                                | Hs.447377  |
| 230030_at    | 3hISvsC_up_FemaleSpecific | HS6ST2              | NA                           | 1.28                             | Xq26.2            | heparan sulfate 6-O-sulfotransferase 2                                     | Hs.385956  |
| 244825_at    | 3hISvsC_up_FemaleSpecific | SHROOM4             | NA                           | 1.59                             | Xp11.22           | shroom family member 4                                                     | Hs.420541  |
| 200737_at    | 3hISvsC_up_Common         | PGK1                | 1.28                         | 1.34                             | Xq13              | phosphoglycerate kinase 1                                                  | Hs.78771   |
| 200821_at    | 3hISvsC_up_Common         | LAMP2               | 1.33                         | 1.37                             | Xq24              | lysosomal-associated membrane protein 2                                    | Hs.496684  |
| 201099_at    | 3hISvsC_up_Common         | USP9X               | 1.34                         | 1.29                             | Xp11.4            | ubiquitin specific peptidase 9, X-linkec                                   | Hs.77578   |
| 201132_at    | 3hISvsC_up_Common         | HNRNPH2             | 1.34                         | 1.41                             | Xq22              | heterogeneous nuclear ribonucleoprotein H2 (H <sup>2</sup> )               | Hs.632828  |
| 201136_at    | 3hISvsC_up_Common         | PLP2                | 1.32                         | 1.34                             | Xp11.23           | proteolipid protein 2 (colonic epithelium-enriched)                        | Hs.77422   |
| 201406_at    | 3hISvsC_up_Common         | RPL36A              | 1.74                         | 1.69                             | Xq22.1            | ribosomal protein L36a                                                     | Hs.432485  |
| 202110_at    | 3hISvsC_up_Common         | COX7B               | 1.79                         | 1.81                             | Xq21.1            | cytochrome c oxidase subunit VIIb                                          | Hs.522699  |
| 202298_at    | 3hISvsC_up_Common         | NDUFA1              | 1.42                         | 1.31                             | Xq24              | NADH dehydrogenase (ubiquinone) 1 alpha subcomplex, 1, 7.5kDa              | Hs.534168  |
| 203042_at    | 3hISvsC_up_Common         | LAMP2               | 1.30                         | 1.39                             | Xq24              | lysosomal-associated membrane protein 2                                    | Hs.496684  |
| 206464_at    | 3hISvsC_up_Common         | BMX                 | 2.42                         | 3.40                             | Xp22.2            | BMX non-receptor tyrosine kinase                                           | Hs.495731  |
| 217383_at    | 3hISvsC_up_Common         | PGK1                | 1.28                         | 1.34                             | Xq13              | Phosphoglycerate kinase 1                                                  | Hs.78771   |
| 218163_at    | 3hISvsC_up_Common         | MCTS1               | 1.33                         | 1.27                             | Xq22-q24          | malignant T cell amplified sequence 1                                      | Hs.102696  |
| 219283_at    | 3hISvsC_up_Common         | C1GALT1C1           | 1.44                         | 1.38                             | Xq24              | C1GALT1-specific chaperone 1                                               | Hs.643920  |
| 220832_at    | 3hISvsC_up_Common         | TLR8                | 1.32                         | 1.34                             | Xp22              | toll-like receptor 8                                                       | Hs.660543  |
| 221895_at    | 3hISvsC_up_Common         | MOSPD2              | 1.32                         | 1.31                             | Xp22.2            | motile sperm domain containing 2                                           | Hs.190043  |
| 222815_at    | 3hISvsC_up_Common         | RNF12               | 1.31                         | 1.33                             | Xq13-q21          | ring finger protein, LIM domain interacting                                | Hs.653288  |
| 223439_at    | 3hISvsC_up_Common         | NKAP                | 1.27                         | 1.25                             | Xq24              | NFKB activating protein                                                    | Hs.522771  |
| 225154_at    | 3hISvsC_up_Common         | SYAP1               | 1.32                         | 1.39                             | Xp22.2            | synapse associated protein 1, SAP47 homolog (Drosophila)                   | Hs.489336  |
| 226671_at    | 3hISvsC_up_Common         | LAMP2               | 1.60                         | 1.57                             | Xq24              | lysosomal-associated membrane protein 2                                    | Hs.496684  |
| 226875_at    | 3hISvsC_up_Common         | DOCK11              | 1.26                         | 1.25                             | Xq24              | dedicator of cytokinesis 11                                                | Hs.368203  |
| 227357_at    | 3hISvsC_up_Common         | MAP3K7IP3           | 1.43                         | 1.34                             | Xp21.2            | TGF-beta activated kinase 1/MAP3K7 binding protein 3                       | Hs.188256  |
| 227425_at    | 3hISvsC_up_Common         | REPS2               | 1.73                         | 1.77                             | Xp22.2-p22.13     | RALBP1 associated Eps domain containing 2                                  | Hs.186810  |
| 229560_at    | 3hISvsC_up_Common         | TLR8                | 1.30                         | 1.47                             | Xp22              | toll-like receptor 8                                                       | Hs.660543  |
| 230532_at    | 3hISvsC_up_Common         | CXorf38             | 1.41                         | 1.27                             | Xp11.4            | chromosome X open reading frame 38                                         | Hs.495961  |
| 233082_at    | 3hISvsC_up_Common         | ZNF182 /// ZNF630   | 1.95                         | 1.80                             | Xp11.3-p11.1      | zinc finger protein 630                                                    | Hs.650883  |
| 243201_at    | 3hISvsC_up_Common         | HNRNPH2             | 1.48                         | 1.33                             | Xq22              | Heterogeneous nuclear ribonucleoprotein H2 (H <sup>2</sup> )               | Hs.632828  |
| 64883_at     | 3hISvsC_up_Common         | MOSPD2              | 1.46                         | 1.40                             | Xp22.2            | motile sperm domain containing 2                                           | Hs.190043  |
| 1555590_a_at | 3hISvsC_down_MaleSpecific | GATA1               | -1.70                        | NA                               | Xp11.23           | GATA binding protein 1 (globin transcription factor 1)                     | Hs.765     |
| 202219_at    | 3hISvsC_down_MaleSpecific | SLC6A8              | -1.82                        | NA                               | Xq28              | solute carrier family 6 (neurotransmitter transporter, creatine), member 8 | Hs.540696  |
| 202711_at    | 3hISvsC_down_MaleSpecific | EFNB1               | -1.25                        | NA                               | Xq12              | ephrin-B1                                                                  | Hs.144700  |
| 206868_at    | 3hISvsC_down_MaleSpecific | STARDB8             | -1.20                        | NA                               | Xq13.1            | STAR-related lipid transfer (START) domain containing 8                    | Hs.95140   |
| 210446_at    | 3hISvsC_down_MaleSpecific | GATA1               | -1.52                        | NA                               | Xp11.23           | GATA binding protein 1 (globin transcription factor 1)                     | Hs.765     |
| 219814_at    | 3hISvsC_down_MaleSpecific | MBNL3               | -1.54                        | NA                               | Xq26.2            | muscleblind-like 3 (Drosophila)                                            | Hs.105134  |

|              |                             |                      |       |       |                      |                                                                                        |           |
|--------------|-----------------------------|----------------------|-------|-------|----------------------|----------------------------------------------------------------------------------------|-----------|
| 1552671_a_at | 3hISvsC_down_FemaleSpecific | SLC9A7               | NA    | -1.27 | Xp11.3-p11.23 Xp11.3 | solute carrier family 9 (sodium/hydrogen exchanger), member 7                          | Hs.496057 |
| 1552882_a_at | 3hISvsC_down_FemaleSpecific | FAM123B              | NA    | -1.50 | Xq11.2               | family with sequence similarity 123E                                                   | Hs.314225 |
| 1553998_at   | 3hISvsC_down_FemaleSpecific | DMRTC1 /// LOC728656 | NA    | -1.75 | Xq13.2               | DMRT-like family C1 /// DMRT-like family C1E                                           | Hs.712728 |
| 1555882_at   | 3hISvsC_down_FemaleSpecific | SPIN3                | NA    | -1.40 | Xp11.21              | spindlin family, member 3                                                              | Hs.522672 |
| 1561660_at   | 3hISvsC_down_FemaleSpecific | MCART6               | NA    | -1.96 | Xq22.2               | mitochondrial carrier triple repeat 6                                                  | Hs.660022 |
| 201540_at    | 3hISvsC_down_FemaleSpecific | FHL1                 | NA    | -1.35 | Xq26                 | four and a half LIM domains 1                                                          | Hs.435369 |
| 209167_at    | 3hISvsC_down_FemaleSpecific | GPM6B                | NA    | -1.68 | Xp22.2               | glycoprotein M6B                                                                       | Hs.495710 |
| 213289_at    | 3hISvsC_down_FemaleSpecific | APOOL                | NA    | -1.58 | Xq21.1               | Apolipoprotein O-like                                                                  | Hs.512181 |
| 214607_at    | 3hISvsC_down_FemaleSpecific | PAK3                 | NA    | -1.64 | Xq23                 | p21 protein (Cdc42/Rac)-activated kinase 3                                             | Hs.656789 |
| 218012_at    | 3hISvsC_down_FemaleSpecific | TSPYL2               | NA    | -1.29 | Xp11.2               | TSPY-like 2                                                                            | Hs.136164 |
| 223915_at    | 3hISvsC_down_FemaleSpecific | BCOR                 | NA    | -1.37 | Xp21.2-p11.4         | BCL6 co-repressor                                                                      | Hs.659681 |
| 224589_at    | 3hISvsC_down_FemaleSpecific | XIST                 | NA    | -1.48 | Xq13.2               | X (inactive)-specific transcript (non-protein coding)                                  | ---       |
| 225028_at    | 3hISvsC_down_FemaleSpecific | LOC550643            | NA    | -1.50 | Xp11.1               | hypothetical LOC550643                                                                 | Hs.355559 |
| 225382_at    | 3hISvsC_down_FemaleSpecific | ZNF275               | NA    | -1.23 | Xq28                 | zinc finger protein 275                                                                | Hs.348963 |
| 225383_at    | 3hISvsC_down_FemaleSpecific | ZNF275               | NA    | -1.43 | Xq28                 | zinc finger protein 275                                                                | Hs.348963 |
| 228005_at    | 3hISvsC_down_FemaleSpecific | ZXDB                 | NA    | -1.44 | Xp11.21              | zinc finger, X-linked, duplicated B                                                    | Hs.156257 |
| 229234_at    | 3hISvsC_down_FemaleSpecific | ZC3H12B              | NA    | -1.46 | Xq12                 | zinc finger CCCH-type containing 12B                                                   | Hs.21249  |
| 229286_at    | 3hISvsC_down_FemaleSpecific | MAGEE1               | NA    | -1.55 | Xq13.3               | melanoma antigen family E, 1                                                           | Hs.8453   |
| 229365_at    | 3hISvsC_down_FemaleSpecific | PPP1R3F              | NA    | -1.34 | Xp11.23              | similar to protein phosphatase 1, regulatory (inhibitor) subunit 3F /// protein phosph | Hs.433652 |
| 230224_at    | 3hISvsC_down_FemaleSpecific | ZCCHC18              | NA    | -1.54 | Xq22.2               | zinc finger, CCHC domain containing 18                                                 | Hs.648338 |
| 235433_at    | 3hISvsC_down_FemaleSpecific | APOOL                | NA    | -1.53 | Xq21.1               | apolipoprotein O-like                                                                  | Hs.512181 |
| 235520_at    | 3hISvsC_down_FemaleSpecific | ZNF280C              | NA    | -1.51 | Xq26.1               | zinc finger protein 280C                                                               | Hs.308418 |
| 236294_at    | 3hISvsC_down_FemaleSpecific | HUWE1                | NA    | -1.29 | Xp11.22              | HECT, UBA and WWE domain containing 1                                                  | Hs.136905 |
| 239034_at    | 3hISvsC_down_FemaleSpecific | CXorf24              | NA    | -1.33 | Xp11.23              | chromosome X open reading frame 24                                                     | Hs.597617 |
| 243764_at    | 3hISvsC_down_FemaleSpecific | VSIG1                | NA    | -1.62 | Xq22.3               | V-set and immunoglobulin domain containing 1                                           | Hs.177164 |
| 32042_at     | 3hISvsC_down_FemaleSpecific | ENOX2                | NA    | -1.24 | Xq25-q26.2           | ecto-NOX disulfide-thiol exchanger 2                                                   | Hs.171458 |
| 204459_at    | 3hISvsC_down_Common         | CSTF2                | -1.25 | -1.26 | Xq22.1               | cleavage stimulation factor, 3' pre-RNA, subunit 2, 64kDa                              | Hs.132370 |
| 207681_at    | 3hISvsC_down_Common         | CXCR3                | -1.45 | -1.42 | Xq13                 | chemokine (C-X-C motif) receptor 3                                                     | Hs.198252 |
| 208723_at    | 3hISvsC_down_Common         | USP11                | -1.29 | -1.30 | Xp11.23              | ubiquitin specific peptidase 11                                                        | Hs.171501 |
| 209014_at    | 3hISvsC_down_Common         | MAGED1               | -1.31 | -1.28 | Xp11.23              | melanoma antigen family D, 1                                                           | Hs.5258   |
| 219433_at    | 3hISvsC_down_Common         | BCOR                 | -1.28 | -1.46 | Xp21.2-p11.4         | BCL6 co-repressor                                                                      | Hs.659681 |

# SUPPLEMENTAL MATERIAL

**Supplementary Table 1. Genes differential expressed between 3h ischemic stroke (3hIS) and non-stroke controls ( C) ( $\alpha \leq 0.05$ , fold change  $\geq |1.2|$ )**

| Probeset ID  | DE list                   | Gene Symbol         | Fold Change                  |                                  | Cytoband          | Gene Title                                                                 | UniGene ID |
|--------------|---------------------------|---------------------|------------------------------|----------------------------------|-------------------|----------------------------------------------------------------------------|------------|
|              |                           |                     | IS * Male vs. Control * Male | IS * Female vs. Control * Female |                   |                                                                            |            |
| 1553007_a_at | 3hISvsC_up_MaleSpecific   | ODZ1                | 1.38                         | NA                               | Xq25              | odz, odd Oz/ten-m homolog 1(Drosophila)                                    | Hs.23796   |
| 1554206_at   | 3hISvsC_up_MaleSpecific   | TMLHE               | 1.39                         | NA                               | Xq28              | trimethyllysine hydroxylase, epsilor                                       | Hs.133321  |
| 1559510_at   | 3hISvsC_up_MaleSpecific   | BHLHB9              | 1.51                         | NA                               | Xq23              | Basic helix-loop-helix domain containing, class B, 9                       | Hs.4276    |
| 201472_at    | 3hISvsC_up_MaleSpecific   | VBP1                | 1.35                         | NA                               | Xq28              | von Hippel-Lindau binding protein 1                                        | Hs.436803  |
| 202105_at    | 3hISvsC_up_MaleSpecific   | IGBP1               | 1.23                         | NA                               | Xq13.1-q13.3      | immunoglobulin (CD79A) binding protein 1                                   | Hs.496267  |
| 206696_at    | 3hISvsC_up_MaleSpecific   | GPR143              | 1.33                         | NA                               | Xp22.3            | G protein-coupled receptor 143                                             | Hs.74124   |
| 209022_at    | 3hISvsC_up_MaleSpecific   | STAG2               | 1.31                         | NA                               | Xq25              | stromal antigen 2                                                          | Hs.496710  |
| 214009_at    | 3hISvsC_up_MaleSpecific   | MSL3L1              | 1.40                         | NA                               | Xp22.3            | male-specific lethal 3 homolog (Drosophila)                                | Hs.655288  |
| 214681_at    | 3hISvsC_up_MaleSpecific   | GK                  | 1.51                         | NA                               | Xp21.3            | glycerol kinase                                                            | Hs.1466    |
| 219771_at    | 3hISvsC_up_MaleSpecific   | TBC1D8B             | 1.56                         | NA                               | Xq22.3            | TBC1 domain family, member 8B (with GRAM domain)                           | Hs.351798  |
| 226335_at    | 3hISvsC_up_MaleSpecific   | RPS6KA3             | 1.28                         | NA                               | Xp22.2-p22.1      | ribosomal protein S6 kinase, 90kDa, polypeptide 3                          | Hs.445387  |
| 228968_at    | 3hISvsC_up_MaleSpecific   | ZNF449              | 1.31                         | NA                               | Xq26.3            | zinc finger protein 449                                                    | Hs.28780   |
| 230866_at    | 3hISvsC_up_MaleSpecific   | CYSLTR1             | 1.39                         | NA                               | Xq13.2-q21.1      | cysteinyl leukotriene receptor 1                                           | Hs.201300  |
| 231747_at    | 3hISvsC_up_MaleSpecific   | CYSLTR1             | 1.23                         | NA                               | Xq13.2-q21.1      | cysteinyl leukotriene receptor 1                                           | Hs.201300  |
| 232087_at    | 3hISvsC_up_MaleSpecific   | CXorf23             | 1.61                         | NA                               | Xp22.12           | chromosome X open reading frame 23                                         | Hs.28896   |
| 232157_at    | 3hISvsC_up_MaleSpecific   | SPRY3               | 1.45                         | NA                               | Xq28 and Yq12     | sprouty homolog 3 (Drosophila)                                             | Hs.381912  |
| 236165_at    | 3hISvsC_up_MaleSpecific   | MSL3L1              | 1.48                         | NA                               | ---               | ---                                                                        | ---        |
| 238053_at    | 3hISvsC_up_MaleSpecific   | DHRX                | 1.44                         | NA                               | Xp22.33; Yp11.2   | dehydrogenase/reductase (SDR family) X-linkec                              | Hs.131452  |
| 238989_at    | 3hISvsC_up_MaleSpecific   | C1GALT1C1           | 1.44                         | NA                               | Xq24              | C1GALT1-specific chaperone 1                                               | Hs.643920  |
| 242931_at    | 3hISvsC_up_MaleSpecific   | LONRF3              | 1.38                         | NA                               | Xq24              | LON peptidase N-terminal domain and ring finger 3                          | Hs.144266  |
| 243683_at    | 3hISvsC_up_MaleSpecific   | MORF4L2             | 1.71                         | NA                               | Xq22              | Mortality factor 4 like 2                                                  | Hs.326387  |
| 244470_at    | 3hISvsC_up_MaleSpecific   | RNF12               | 1.27                         | NA                               | Xq13-q21          | Ring finger protein, LIM domain interacting                                | Hs.653288  |
| 1552927_at   | 3hISvsC_up_FemaleSpecific | MAP3K7IP3           | NA                           | 1.48                             | Xp21.2            | TGF-beta activated kinase 1/MAP3K7 binding protein 3                       | Hs.188256  |
| 1557726_at   | 3hISvsC_up_FemaleSpecific | ARMCX4              | NA                           | 1.21                             | Xq22.1            | armadillo repeat containing, X-linked 4                                    | Hs.9728    |
| 1557880_at   | 3hISvsC_up_FemaleSpecific | PCDH11X /// PCDH11Y | NA                           | 1.33                             | Xq21.3 /// Yp11.2 | protocadherin 11 X-linked /// protocadherin 11 Y-linkec                    | Hs.661308  |
| 1562805_at   | 3hISvsC_up_FemaleSpecific | LOC349408           | NA                           | 1.43                             | Xp22.31           | hypothetical LOC349408                                                     | Hs.685035  |
| 1565446_at   | 3hISvsC_up_FemaleSpecific | HPRT1               | NA                           | 1.22                             | Xq26.1            | Hypoxanthine phosphoribosyltransferase 1                                   | Hs.412707  |
| 201210_at    | 3hISvsC_up_FemaleSpecific | DDX3X               | NA                           | 1.20                             | Xp11.3-p11.23     | DEAD (Asp-Glu-Ala-Asp) box polypeptide 3, X-linkec                         | Hs.380774  |
| 201666_at    | 3hISvsC_up_FemaleSpecific | TIMP1               | NA                           | 1.29                             | Xp11.3-p11.23     | TIMP metalloproteinase inhibitor 1                                         | Hs.522632  |
| 205645_at    | 3hISvsC_up_FemaleSpecific | REPS2               | NA                           | 1.55                             | Xp22.2-p22.13     | RALBP1 associated Eps domain containing 2                                  | Hs.186810  |
| 206002_at    | 3hISvsC_up_FemaleSpecific | GPR64               | NA                           | 1.31                             | Xp22.13           | G protein-coupled receptor 64                                              | Hs.146978  |
| 210274_at    | 3hISvsC_up_FemaleSpecific | MAGEA8              | NA                           | 1.22                             | Xq28              | melanoma antigen family A, 8                                               | Hs.522803  |
| 212340_at    | 3hISvsC_up_FemaleSpecific | YIPF6               | NA                           | 1.45                             | Xq12              | Yip1 domain family, member 6                                               | Hs.82719   |
| 212457_at    | 3hISvsC_up_FemaleSpecific | TFE3                | NA                           | 1.22                             | Xp11.22           | transcription factor binding to IGHM enhancer 3                            | Hs.274184  |
| 212741_at    | 3hISvsC_up_FemaleSpecific | MAOA                | NA                           | 2.67                             | Xp11.3            | monoamine oxidase A                                                        | Hs.183109  |
| 216722_at    | 3hISvsC_up_FemaleSpecific | VENTXP1             | NA                           | 1.21                             | Xp21.3            | VENT homeobox (Xenopus laevis) pseudogene 1                                | Hs.447377  |
| 230030_at    | 3hISvsC_up_FemaleSpecific | HS6ST2              | NA                           | 1.28                             | Xq26.2            | heparan sulfate 6-O-sulfotransferase 2                                     | Hs.385956  |
| 244825_at    | 3hISvsC_up_FemaleSpecific | SHROOM4             | NA                           | 1.59                             | Xp11.22           | shroom family member 4                                                     | Hs.420541  |
| 200737_at    | 3hISvsC_up_Common         | PGK1                | 1.28                         | 1.34                             | Xq13              | phosphoglycerate kinase 1                                                  | Hs.78771   |
| 200821_at    | 3hISvsC_up_Common         | LAMP2               | 1.33                         | 1.37                             | Xq24              | lysosomal-associated membrane protein 2                                    | Hs.496684  |
| 201099_at    | 3hISvsC_up_Common         | USP9X               | 1.34                         | 1.29                             | Xp11.4            | ubiquitin specific peptidase 9, X-linkec                                   | Hs.77578   |
| 201132_at    | 3hISvsC_up_Common         | HNRNPH2             | 1.34                         | 1.41                             | Xq22              | heterogeneous nuclear ribonucleoprotein H2 (H <sup>2</sup> )               | Hs.632828  |
| 201136_at    | 3hISvsC_up_Common         | PLP2                | 1.32                         | 1.34                             | Xp11.23           | proteolipid protein 2 (colonic epithelium-enriched)                        | Hs.77422   |
| 201406_at    | 3hISvsC_up_Common         | RPL36A              | 1.74                         | 1.69                             | Xq22.1            | ribosomal protein L36a                                                     | Hs.432485  |
| 202110_at    | 3hISvsC_up_Common         | COX7B               | 1.79                         | 1.81                             | Xq21.1            | cytochrome c oxidase subunit VIIb                                          | Hs.522699  |
| 202298_at    | 3hISvsC_up_Common         | NDUFA1              | 1.42                         | 1.31                             | Xq24              | NADH dehydrogenase (ubiquinone) 1 alpha subcomplex, 1, 7.5kDa              | Hs.534168  |
| 203042_at    | 3hISvsC_up_Common         | LAMP2               | 1.30                         | 1.39                             | Xq24              | lysosomal-associated membrane protein 2                                    | Hs.496684  |
| 206464_at    | 3hISvsC_up_Common         | BMX                 | 2.42                         | 3.40                             | Xp22.2            | BMX non-receptor tyrosine kinase                                           | Hs.495731  |
| 217383_at    | 3hISvsC_up_Common         | PGK1                | 1.28                         | 1.34                             | Xq13              | Phosphoglycerate kinase 1                                                  | Hs.78771   |
| 218163_at    | 3hISvsC_up_Common         | MCTS1               | 1.33                         | 1.27                             | Xq22-q24          | malignant T cell amplified sequence 1                                      | Hs.102696  |
| 219283_at    | 3hISvsC_up_Common         | C1GALT1C1           | 1.44                         | 1.38                             | Xq24              | C1GALT1-specific chaperone 1                                               | Hs.643920  |
| 220832_at    | 3hISvsC_up_Common         | TLR8                | 1.32                         | 1.34                             | Xp22              | toll-like receptor 8                                                       | Hs.660543  |
| 221895_at    | 3hISvsC_up_Common         | MOSPD2              | 1.32                         | 1.31                             | Xp22.2            | motile sperm domain containing 2                                           | Hs.190043  |
| 222815_at    | 3hISvsC_up_Common         | RNF12               | 1.31                         | 1.33                             | Xq13-q21          | ring finger protein, LIM domain interacting                                | Hs.653288  |
| 223439_at    | 3hISvsC_up_Common         | NKAP                | 1.27                         | 1.25                             | Xq24              | NFKB activating protein                                                    | Hs.522771  |
| 225154_at    | 3hISvsC_up_Common         | SYAP1               | 1.32                         | 1.39                             | Xp22.2            | synapse associated protein 1, SAP47 homolog (Drosophila)                   | Hs.489336  |
| 226671_at    | 3hISvsC_up_Common         | LAMP2               | 1.60                         | 1.57                             | Xq24              | lysosomal-associated membrane protein 2                                    | Hs.496684  |
| 226875_at    | 3hISvsC_up_Common         | DOCK11              | 1.26                         | 1.25                             | Xq24              | dedicator of cytokinesis 11                                                | Hs.368203  |
| 227357_at    | 3hISvsC_up_Common         | MAP3K7IP3           | 1.43                         | 1.34                             | Xp21.2            | TGF-beta activated kinase 1/MAP3K7 binding protein 3                       | Hs.188256  |
| 227425_at    | 3hISvsC_up_Common         | REPS2               | 1.73                         | 1.77                             | Xp22.2-p22.13     | RALBP1 associated Eps domain containing 2                                  | Hs.186810  |
| 229560_at    | 3hISvsC_up_Common         | TLR8                | 1.30                         | 1.47                             | Xp22              | toll-like receptor 8                                                       | Hs.660543  |
| 230532_at    | 3hISvsC_up_Common         | CXorf38             | 1.41                         | 1.27                             | Xp11.4            | chromosome X open reading frame 38                                         | Hs.495961  |
| 233082_at    | 3hISvsC_up_Common         | ZNF182 /// ZNF630   | 1.95                         | 1.80                             | Xp11.3-p11.1      | zinc finger protein 630                                                    | Hs.650883  |
| 243201_at    | 3hISvsC_up_Common         | HNRNPH2             | 1.48                         | 1.33                             | Xq22              | Heterogeneous nuclear ribonucleoprotein H2 (H <sup>2</sup> )               | Hs.632828  |
| 64883_at     | 3hISvsC_up_Common         | MOSPD2              | 1.46                         | 1.40                             | Xp22.2            | motile sperm domain containing 2                                           | Hs.190043  |
| 1555590_a_at | 3hISvsC_down_MaleSpecific | GATA1               | -1.70                        | NA                               | Xp11.23           | GATA binding protein 1 (globin transcription factor 1)                     | Hs.765     |
| 202219_at    | 3hISvsC_down_MaleSpecific | SLC6A8              | -1.82                        | NA                               | Xq28              | solute carrier family 6 (neurotransmitter transporter, creatine), member 8 | Hs.540696  |
| 202711_at    | 3hISvsC_down_MaleSpecific | EFNB1               | -1.25                        | NA                               | Xq12              | ephrin-B1                                                                  | Hs.144700  |
| 206868_at    | 3hISvsC_down_MaleSpecific | STARDB8             | -1.20                        | NA                               | Xq13.1            | STAR-related lipid transfer (START) domain containing 8                    | Hs.95140   |
| 210446_at    | 3hISvsC_down_MaleSpecific | GATA1               | -1.52                        | NA                               | Xp11.23           | GATA binding protein 1 (globin transcription factor 1)                     | Hs.765     |
| 219814_at    | 3hISvsC_down_MaleSpecific | MBNL3               | -1.54                        | NA                               | Xq26.2            | muscleblind-like 3 (Drosophila)                                            | Hs.105134  |

|              |                             |                      |       |       |                      |                                                                                        |           |
|--------------|-----------------------------|----------------------|-------|-------|----------------------|----------------------------------------------------------------------------------------|-----------|
| 1552671_a_at | 3hISvsC_down_FemaleSpecific | SLC9A7               | NA    | -1.27 | Xp11.3-p11.23 Xp11.3 | solute carrier family 9 (sodium/hydrogen exchanger), member 7                          | Hs.496057 |
| 1552882_a_at | 3hISvsC_down_FemaleSpecific | FAM123B              | NA    | -1.50 | Xq11.2               | family with sequence similarity 123E                                                   | Hs.314225 |
| 1553998_at   | 3hISvsC_down_FemaleSpecific | DMRTC1 /// LOC728656 | NA    | -1.75 | Xq13.2               | DMRT-like family C1 /// DMRT-like family C1E                                           | Hs.712728 |
| 1555882_at   | 3hISvsC_down_FemaleSpecific | SPIN3                | NA    | -1.40 | Xp11.21              | spindlin family, member 3                                                              | Hs.522672 |
| 1561660_at   | 3hISvsC_down_FemaleSpecific | MCART6               | NA    | -1.96 | Xq22.2               | mitochondrial carrier triple repeat 6                                                  | Hs.660022 |
| 201540_at    | 3hISvsC_down_FemaleSpecific | FHL1                 | NA    | -1.35 | Xq26                 | four and a half LIM domains 1                                                          | Hs.435369 |
| 209167_at    | 3hISvsC_down_FemaleSpecific | GPM6B                | NA    | -1.68 | Xp22.2               | glycoprotein M6B                                                                       | Hs.495710 |
| 213289_at    | 3hISvsC_down_FemaleSpecific | APOOL                | NA    | -1.58 | Xq21.1               | Apolipoprotein O-like                                                                  | Hs.512181 |
| 214607_at    | 3hISvsC_down_FemaleSpecific | PAK3                 | NA    | -1.64 | Xq23                 | p21 protein (Cdc42/Rac)-activated kinase 3                                             | Hs.656789 |
| 218012_at    | 3hISvsC_down_FemaleSpecific | TSPYL2               | NA    | -1.29 | Xp11.2               | TSPY-like 2                                                                            | Hs.136164 |
| 223915_at    | 3hISvsC_down_FemaleSpecific | BCOR                 | NA    | -1.37 | Xp21.2-p11.4         | BCL6 co-repressor                                                                      | Hs.659681 |
| 224589_at    | 3hISvsC_down_FemaleSpecific | XIST                 | NA    | -1.48 | Xq13.2               | X (inactive)-specific transcript (non-protein coding)                                  | ---       |
| 225028_at    | 3hISvsC_down_FemaleSpecific | LOC550643            | NA    | -1.50 | Xp11.1               | hypothetical LOC550643                                                                 | Hs.355559 |
| 225382_at    | 3hISvsC_down_FemaleSpecific | ZNF275               | NA    | -1.23 | Xq28                 | zinc finger protein 275                                                                | Hs.348963 |
| 225383_at    | 3hISvsC_down_FemaleSpecific | ZNF275               | NA    | -1.43 | Xq28                 | zinc finger protein 275                                                                | Hs.348963 |
| 228005_at    | 3hISvsC_down_FemaleSpecific | ZXDB                 | NA    | -1.44 | Xp11.21              | zinc finger, X-linked, duplicated B                                                    | Hs.156257 |
| 229234_at    | 3hISvsC_down_FemaleSpecific | ZC3H12B              | NA    | -1.46 | Xq12                 | zinc finger CCCH-type containing 12B                                                   | Hs.21249  |
| 229286_at    | 3hISvsC_down_FemaleSpecific | MAGEE1               | NA    | -1.55 | Xq13.3               | melanoma antigen family E, 1                                                           | Hs.8453   |
| 229365_at    | 3hISvsC_down_FemaleSpecific | PPP1R3F              | NA    | -1.34 | Xp11.23              | similar to protein phosphatase 1, regulatory (inhibitor) subunit 3F /// protein phosph | Hs.433652 |
| 230224_at    | 3hISvsC_down_FemaleSpecific | ZCCHC18              | NA    | -1.54 | Xq22.2               | zinc finger, CCHC domain containing 18                                                 | Hs.648338 |
| 235433_at    | 3hISvsC_down_FemaleSpecific | APOOL                | NA    | -1.53 | Xq21.1               | apolipoprotein O-like                                                                  | Hs.512181 |
| 235520_at    | 3hISvsC_down_FemaleSpecific | ZNF280C              | NA    | -1.51 | Xq26.1               | zinc finger protein 280C                                                               | Hs.308418 |
| 236294_at    | 3hISvsC_down_FemaleSpecific | HUWE1                | NA    | -1.29 | Xp11.22              | HECT, UBA and WWE domain containing 1                                                  | Hs.136905 |
| 239034_at    | 3hISvsC_down_FemaleSpecific | CXorf24              | NA    | -1.33 | Xp11.23              | chromosome X open reading frame 24                                                     | Hs.597617 |
| 243764_at    | 3hISvsC_down_FemaleSpecific | VSIG1                | NA    | -1.62 | Xq22.3               | V-set and immunoglobulin domain containing 1                                           | Hs.177164 |
| 32042_at     | 3hISvsC_down_FemaleSpecific | ENOX2                | NA    | -1.24 | Xq25-q26.2           | ecto-NOX disulfide-thiol exchanger 2                                                   | Hs.171458 |
| 204459_at    | 3hISvsC_down_Common         | CSTF2                | -1.25 | -1.26 | Xq22.1               | cleavage stimulation factor, 3' pre-RNA, subunit 2, 64kDa                              | Hs.132370 |
| 207681_at    | 3hISvsC_down_Common         | CXCR3                | -1.45 | -1.42 | Xq13                 | chemokine (C-X-C motif) receptor 3                                                     | Hs.198252 |
| 208723_at    | 3hISvsC_down_Common         | USP11                | -1.29 | -1.30 | Xp11.23              | ubiquitin specific peptidase 11                                                        | Hs.171501 |
| 209014_at    | 3hISvsC_down_Common         | MAGED1               | -1.31 | -1.28 | Xp11.23              | melanoma antigen family D, 1                                                           | Hs.5258   |
| 219433_at    | 3hISvsC_down_Common         | BCOR                 | -1.28 | -1.46 | Xp21.2-p11.4         | BCL6 co-repressor                                                                      | Hs.659681 |

# SUPPLEMENTAL MATERIAL

**Supplementary Table 1. Genes differential expressed between 3h ischemic stroke (3hIS) and non-stroke controls ( C) ( $\alpha \leq 0.05$ , fold change  $\geq |1.2|$ )**

| Probeset ID  | DE list                   | Gene Symbol         | Fold Change                  |                                  | Cytoband          | Gene Title                                                                 | UniGene ID |
|--------------|---------------------------|---------------------|------------------------------|----------------------------------|-------------------|----------------------------------------------------------------------------|------------|
|              |                           |                     | IS * Male vs. Control * Male | IS * Female vs. Control * Female |                   |                                                                            |            |
| 1553007_a_at | 3hISvsC_up_MaleSpecific   | ODZ1                | 1.38                         | NA                               | Xq25              | odz, odd Oz/ten-m homolog 1(Drosophila)                                    | Hs.23796   |
| 1554206_at   | 3hISvsC_up_MaleSpecific   | TMLHE               | 1.39                         | NA                               | Xq28              | trimethyllysine hydroxylase, epsilor                                       | Hs.133321  |
| 1559510_at   | 3hISvsC_up_MaleSpecific   | BHLHB9              | 1.51                         | NA                               | Xq23              | Basic helix-loop-helix domain containing, class B, 9                       | Hs.4276    |
| 201472_at    | 3hISvsC_up_MaleSpecific   | VBP1                | 1.35                         | NA                               | Xq28              | von Hippel-Lindau binding protein 1                                        | Hs.436803  |
| 202105_at    | 3hISvsC_up_MaleSpecific   | IGBP1               | 1.23                         | NA                               | Xq13.1-q13.3      | immunoglobulin (CD79A) binding protein 1                                   | Hs.496267  |
| 206696_at    | 3hISvsC_up_MaleSpecific   | GPR143              | 1.33                         | NA                               | Xp22.3            | G protein-coupled receptor 143                                             | Hs.74124   |
| 209022_at    | 3hISvsC_up_MaleSpecific   | STAG2               | 1.31                         | NA                               | Xq25              | stromal antigen 2                                                          | Hs.496710  |
| 214009_at    | 3hISvsC_up_MaleSpecific   | MSL3L1              | 1.40                         | NA                               | Xp22.3            | male-specific lethal 3 homolog (Drosophila)                                | Hs.655288  |
| 214681_at    | 3hISvsC_up_MaleSpecific   | GK                  | 1.51                         | NA                               | Xp21.3            | glycerol kinase                                                            | Hs.1466    |
| 219771_at    | 3hISvsC_up_MaleSpecific   | TBC1D8B             | 1.56                         | NA                               | Xq22.3            | TBC1 domain family, member 8B (with GRAM domain)                           | Hs.351798  |
| 226335_at    | 3hISvsC_up_MaleSpecific   | RPS6KA3             | 1.28                         | NA                               | Xp22.2-p22.1      | ribosomal protein S6 kinase, 90kDa, polypeptide 3                          | Hs.445387  |
| 228968_at    | 3hISvsC_up_MaleSpecific   | ZNF449              | 1.31                         | NA                               | Xq26.3            | zinc finger protein 449                                                    | Hs.28780   |
| 230866_at    | 3hISvsC_up_MaleSpecific   | CYSLTR1             | 1.39                         | NA                               | Xq13.2-q21.1      | cysteinyl leukotriene receptor 1                                           | Hs.201300  |
| 231747_at    | 3hISvsC_up_MaleSpecific   | CYSLTR1             | 1.23                         | NA                               | Xq13.2-q21.1      | cysteinyl leukotriene receptor 1                                           | Hs.201300  |
| 232087_at    | 3hISvsC_up_MaleSpecific   | CXorf23             | 1.61                         | NA                               | Xp22.12           | chromosome X open reading frame 23                                         | Hs.28896   |
| 232157_at    | 3hISvsC_up_MaleSpecific   | SPRY3               | 1.45                         | NA                               | Xq28 and Yq12     | sprouty homolog 3 (Drosophila)                                             | Hs.381912  |
| 236165_at    | 3hISvsC_up_MaleSpecific   | MSL3L1              | 1.48                         | NA                               | ---               | ---                                                                        | ---        |
| 238053_at    | 3hISvsC_up_MaleSpecific   | DHRX                | 1.44                         | NA                               | Xp22.33; Yp11.2   | dehydrogenase/reductase (SDR family) X-linkec                              | Hs.131452  |
| 238989_at    | 3hISvsC_up_MaleSpecific   | C1GALT1C1           | 1.44                         | NA                               | Xq24              | C1GALT1-specific chaperone 1                                               | Hs.643920  |
| 242931_at    | 3hISvsC_up_MaleSpecific   | LONRF3              | 1.38                         | NA                               | Xq24              | LON peptidase N-terminal domain and ring finger 3                          | Hs.144266  |
| 243683_at    | 3hISvsC_up_MaleSpecific   | MORF4L2             | 1.71                         | NA                               | Xq22              | Mortality factor 4 like 2                                                  | Hs.326387  |
| 244470_at    | 3hISvsC_up_MaleSpecific   | RNF12               | 1.27                         | NA                               | Xq13-q21          | Ring finger protein, LIM domain interacting                                | Hs.653288  |
| 1552927_at   | 3hISvsC_up_FemaleSpecific | MAP3K7IP3           | NA                           | 1.48                             | Xp21.2            | TGF-beta activated kinase 1/MAP3K7 binding protein 3                       | Hs.188256  |
| 1557726_at   | 3hISvsC_up_FemaleSpecific | ARMCX4              | NA                           | 1.21                             | Xq22.1            | armadillo repeat containing, X-linked 4                                    | Hs.9728    |
| 1557880_at   | 3hISvsC_up_FemaleSpecific | PCDH11X /// PCDH11Y | NA                           | 1.33                             | Xq21.3 /// Yp11.2 | protocadherin 11 X-linked /// protocadherin 11 Y-linkec                    | Hs.661308  |
| 1562805_at   | 3hISvsC_up_FemaleSpecific | LOC349408           | NA                           | 1.43                             | Xp22.31           | hypothetical LOC349408                                                     | Hs.685035  |
| 1565446_at   | 3hISvsC_up_FemaleSpecific | HPRT1               | NA                           | 1.22                             | Xq26.1            | Hypoxanthine phosphoribosyltransferase 1                                   | Hs.412707  |
| 201210_at    | 3hISvsC_up_FemaleSpecific | DDX3X               | NA                           | 1.20                             | Xp11.3-p11.23     | DEAD (Asp-Glu-Ala-Asp) box polypeptide 3, X-linkec                         | Hs.380774  |
| 201666_at    | 3hISvsC_up_FemaleSpecific | TIMP1               | NA                           | 1.29                             | Xp11.3-p11.23     | TIMP metalloproteinase inhibitor 1                                         | Hs.522632  |
| 205645_at    | 3hISvsC_up_FemaleSpecific | REPS2               | NA                           | 1.55                             | Xp22.2-p22.13     | RALBP1 associated Eps domain containing 2                                  | Hs.186810  |
| 206002_at    | 3hISvsC_up_FemaleSpecific | GPR64               | NA                           | 1.31                             | Xp22.13           | G protein-coupled receptor 64                                              | Hs.146978  |
| 210274_at    | 3hISvsC_up_FemaleSpecific | MAGEA8              | NA                           | 1.22                             | Xq28              | melanoma antigen family A, 8                                               | Hs.522803  |
| 212340_at    | 3hISvsC_up_FemaleSpecific | YIPF6               | NA                           | 1.45                             | Xq12              | Yip1 domain family, member 6                                               | Hs.82719   |
| 212457_at    | 3hISvsC_up_FemaleSpecific | TFE3                | NA                           | 1.22                             | Xp11.22           | transcription factor binding to IGHM enhancer 3                            | Hs.274184  |
| 212741_at    | 3hISvsC_up_FemaleSpecific | MAOA                | NA                           | 2.67                             | Xp11.3            | monoamine oxidase A                                                        | Hs.183109  |
| 216722_at    | 3hISvsC_up_FemaleSpecific | VENTXP1             | NA                           | 1.21                             | Xp21.3            | VENT homeobox (Xenopus laevis) pseudogene 1                                | Hs.447377  |
| 230030_at    | 3hISvsC_up_FemaleSpecific | HS6ST2              | NA                           | 1.28                             | Xq26.2            | heparan sulfate 6-O-sulfotransferase 2                                     | Hs.385956  |
| 244825_at    | 3hISvsC_up_FemaleSpecific | SHROOM4             | NA                           | 1.59                             | Xp11.22           | shroom family member 4                                                     | Hs.420541  |
| 200737_at    | 3hISvsC_up_Common         | PGK1                | 1.28                         | 1.34                             | Xq13              | phosphoglycerate kinase 1                                                  | Hs.78771   |
| 200821_at    | 3hISvsC_up_Common         | LAMP2               | 1.33                         | 1.37                             | Xq24              | lysosomal-associated membrane protein 2                                    | Hs.496684  |
| 201099_at    | 3hISvsC_up_Common         | USP9X               | 1.34                         | 1.29                             | Xp11.4            | ubiquitin specific peptidase 9, X-linkec                                   | Hs.77578   |
| 201132_at    | 3hISvsC_up_Common         | HNRNPH2             | 1.34                         | 1.41                             | Xq22              | heterogeneous nuclear ribonucleoprotein H2 (H <sup>2</sup> )               | Hs.632828  |
| 201136_at    | 3hISvsC_up_Common         | PLP2                | 1.32                         | 1.34                             | Xp11.23           | proteolipid protein 2 (colonic epithelium-enriched)                        | Hs.77422   |
| 201406_at    | 3hISvsC_up_Common         | RPL36A              | 1.74                         | 1.69                             | Xq22.1            | ribosomal protein L36a                                                     | Hs.432485  |
| 202110_at    | 3hISvsC_up_Common         | COX7B               | 1.79                         | 1.81                             | Xq21.1            | cytochrome c oxidase subunit VIIb                                          | Hs.522699  |
| 202298_at    | 3hISvsC_up_Common         | NDUFA1              | 1.42                         | 1.31                             | Xq24              | NADH dehydrogenase (ubiquinone) 1 alpha subcomplex, 1, 7.5kDa              | Hs.534168  |
| 203042_at    | 3hISvsC_up_Common         | LAMP2               | 1.30                         | 1.39                             | Xq24              | lysosomal-associated membrane protein 2                                    | Hs.496684  |
| 206464_at    | 3hISvsC_up_Common         | BMX                 | 2.42                         | 3.40                             | Xp22.2            | BMX non-receptor tyrosine kinase                                           | Hs.495731  |
| 217383_at    | 3hISvsC_up_Common         | PGK1                | 1.28                         | 1.34                             | Xq13              | Phosphoglycerate kinase 1                                                  | Hs.78771   |
| 218163_at    | 3hISvsC_up_Common         | MCTS1               | 1.33                         | 1.27                             | Xq22-q24          | malignant T cell amplified sequence 1                                      | Hs.102696  |
| 219283_at    | 3hISvsC_up_Common         | C1GALT1C1           | 1.44                         | 1.38                             | Xq24              | C1GALT1-specific chaperone 1                                               | Hs.643920  |
| 220832_at    | 3hISvsC_up_Common         | TLR8                | 1.32                         | 1.34                             | Xp22              | toll-like receptor 8                                                       | Hs.660543  |
| 221895_at    | 3hISvsC_up_Common         | MOSPD2              | 1.32                         | 1.31                             | Xp22.2            | motile sperm domain containing 2                                           | Hs.190043  |
| 222815_at    | 3hISvsC_up_Common         | RNF12               | 1.31                         | 1.33                             | Xq13-q21          | ring finger protein, LIM domain interacting                                | Hs.653288  |
| 223439_at    | 3hISvsC_up_Common         | NKAP                | 1.27                         | 1.25                             | Xq24              | NFKB activating protein                                                    | Hs.522771  |
| 225154_at    | 3hISvsC_up_Common         | SYAP1               | 1.32                         | 1.39                             | Xp22.2            | synapse associated protein 1, SAP47 homolog (Drosophila)                   | Hs.489336  |
| 226671_at    | 3hISvsC_up_Common         | LAMP2               | 1.60                         | 1.57                             | Xq24              | lysosomal-associated membrane protein 2                                    | Hs.496684  |
| 226875_at    | 3hISvsC_up_Common         | DOCK11              | 1.26                         | 1.25                             | Xq24              | dedicator of cytokinesis 11                                                | Hs.368203  |
| 227357_at    | 3hISvsC_up_Common         | MAP3K7IP3           | 1.43                         | 1.34                             | Xp21.2            | TGF-beta activated kinase 1/MAP3K7 binding protein 3                       | Hs.188256  |
| 227425_at    | 3hISvsC_up_Common         | REPS2               | 1.73                         | 1.77                             | Xp22.2-p22.13     | RALBP1 associated Eps domain containing 2                                  | Hs.186810  |
| 229560_at    | 3hISvsC_up_Common         | TLR8                | 1.30                         | 1.47                             | Xp22              | toll-like receptor 8                                                       | Hs.660543  |
| 230532_at    | 3hISvsC_up_Common         | CXorf38             | 1.41                         | 1.27                             | Xp11.4            | chromosome X open reading frame 38                                         | Hs.495961  |
| 233082_at    | 3hISvsC_up_Common         | ZNF182 /// ZNF630   | 1.95                         | 1.80                             | Xp11.3-p11.1      | zinc finger protein 630                                                    | Hs.650883  |
| 243201_at    | 3hISvsC_up_Common         | HNRNPH2             | 1.48                         | 1.33                             | Xq22              | Heterogeneous nuclear ribonucleoprotein H2 (H <sup>2</sup> )               | Hs.632828  |
| 64883_at     | 3hISvsC_up_Common         | MOSPD2              | 1.46                         | 1.40                             | Xp22.2            | motile sperm domain containing 2                                           | Hs.190043  |
| 1555590_a_at | 3hISvsC_down_MaleSpecific | GATA1               | -1.70                        | NA                               | Xp11.23           | GATA binding protein 1 (globin transcription factor 1)                     | Hs.765     |
| 202219_at    | 3hISvsC_down_MaleSpecific | SLC6A8              | -1.82                        | NA                               | Xq28              | solute carrier family 6 (neurotransmitter transporter, creatine), member 8 | Hs.540696  |
| 202711_at    | 3hISvsC_down_MaleSpecific | EFNB1               | -1.25                        | NA                               | Xq12              | ephrin-B1                                                                  | Hs.144700  |
| 206868_at    | 3hISvsC_down_MaleSpecific | STARDB8             | -1.20                        | NA                               | Xq13.1            | STAR-related lipid transfer (START) domain containing 8                    | Hs.95140   |
| 210446_at    | 3hISvsC_down_MaleSpecific | GATA1               | -1.52                        | NA                               | Xp11.23           | GATA binding protein 1 (globin transcription factor 1)                     | Hs.765     |
| 219814_at    | 3hISvsC_down_MaleSpecific | MBNL3               | -1.54                        | NA                               | Xq26.2            | muscleblind-like 3 (Drosophila)                                            | Hs.105134  |

|              |                             |                      |       |       |                      |                                                                                        |           |
|--------------|-----------------------------|----------------------|-------|-------|----------------------|----------------------------------------------------------------------------------------|-----------|
| 1552671_a_at | 3hISvsC_down_FemaleSpecific | SLC9A7               | NA    | -1.27 | Xp11.3-p11.23 Xp11.3 | solute carrier family 9 (sodium/hydrogen exchanger), member 7                          | Hs.496057 |
| 1552882_a_at | 3hISvsC_down_FemaleSpecific | FAM123B              | NA    | -1.50 | Xq11.2               | family with sequence similarity 123E                                                   | Hs.314225 |
| 1553998_at   | 3hISvsC_down_FemaleSpecific | DMRTC1 /// LOC728656 | NA    | -1.75 | Xq13.2               | DMRT-like family C1 /// DMRT-like family C1E                                           | Hs.712728 |
| 1555882_at   | 3hISvsC_down_FemaleSpecific | SPIN3                | NA    | -1.40 | Xp11.21              | spindlin family, member 3                                                              | Hs.522672 |
| 1561660_at   | 3hISvsC_down_FemaleSpecific | MCART6               | NA    | -1.96 | Xq22.2               | mitochondrial carrier triple repeat 6                                                  | Hs.660022 |
| 201540_at    | 3hISvsC_down_FemaleSpecific | FHL1                 | NA    | -1.35 | Xq26                 | four and a half LIM domains 1                                                          | Hs.435369 |
| 209167_at    | 3hISvsC_down_FemaleSpecific | GPM6B                | NA    | -1.68 | Xp22.2               | glycoprotein M6B                                                                       | Hs.495710 |
| 213289_at    | 3hISvsC_down_FemaleSpecific | APOOL                | NA    | -1.58 | Xq21.1               | Apolipoprotein O-like                                                                  | Hs.512181 |
| 214607_at    | 3hISvsC_down_FemaleSpecific | PAK3                 | NA    | -1.64 | Xq23                 | p21 protein (Cdc42/Rac)-activated kinase 3                                             | Hs.656789 |
| 218012_at    | 3hISvsC_down_FemaleSpecific | TSPYL2               | NA    | -1.29 | Xp11.2               | TSPY-like 2                                                                            | Hs.136164 |
| 223915_at    | 3hISvsC_down_FemaleSpecific | BCOR                 | NA    | -1.37 | Xp21.2-p11.4         | BCL6 co-repressor                                                                      | Hs.659681 |
| 224589_at    | 3hISvsC_down_FemaleSpecific | XIST                 | NA    | -1.48 | Xq13.2               | X (inactive)-specific transcript (non-protein coding)                                  | ---       |
| 225028_at    | 3hISvsC_down_FemaleSpecific | LOC550643            | NA    | -1.50 | Xp11.1               | hypothetical LOC550643                                                                 | Hs.355559 |
| 225382_at    | 3hISvsC_down_FemaleSpecific | ZNF275               | NA    | -1.23 | Xq28                 | zinc finger protein 275                                                                | Hs.348963 |
| 225383_at    | 3hISvsC_down_FemaleSpecific | ZNF275               | NA    | -1.43 | Xq28                 | zinc finger protein 275                                                                | Hs.348963 |
| 228005_at    | 3hISvsC_down_FemaleSpecific | ZXDB                 | NA    | -1.44 | Xp11.21              | zinc finger, X-linked, duplicated B                                                    | Hs.156257 |
| 229234_at    | 3hISvsC_down_FemaleSpecific | ZC3H12B              | NA    | -1.46 | Xq12                 | zinc finger CCCH-type containing 12B                                                   | Hs.21249  |
| 229286_at    | 3hISvsC_down_FemaleSpecific | MAGEE1               | NA    | -1.55 | Xq13.3               | melanoma antigen family E, 1                                                           | Hs.8453   |
| 229365_at    | 3hISvsC_down_FemaleSpecific | PPP1R3F              | NA    | -1.34 | Xp11.23              | similar to protein phosphatase 1, regulatory (inhibitor) subunit 3F /// protein phosph | Hs.433652 |
| 230224_at    | 3hISvsC_down_FemaleSpecific | ZCCHC18              | NA    | -1.54 | Xq22.2               | zinc finger, CCHC domain containing 18                                                 | Hs.648338 |
| 235433_at    | 3hISvsC_down_FemaleSpecific | APOOL                | NA    | -1.53 | Xq21.1               | apolipoprotein O-like                                                                  | Hs.512181 |
| 235520_at    | 3hISvsC_down_FemaleSpecific | ZNF280C              | NA    | -1.51 | Xq26.1               | zinc finger protein 280C                                                               | Hs.308418 |
| 236294_at    | 3hISvsC_down_FemaleSpecific | HUWE1                | NA    | -1.29 | Xp11.22              | HECT, UBA and WWE domain containing 1                                                  | Hs.136905 |
| 239034_at    | 3hISvsC_down_FemaleSpecific | CXorf24              | NA    | -1.33 | Xp11.23              | chromosome X open reading frame 24                                                     | Hs.597617 |
| 243764_at    | 3hISvsC_down_FemaleSpecific | VSIG1                | NA    | -1.62 | Xq22.3               | V-set and immunoglobulin domain containing 1                                           | Hs.177164 |
| 32042_at     | 3hISvsC_down_FemaleSpecific | ENOX2                | NA    | -1.24 | Xq25-q26.2           | ecto-NOX disulfide-thiol exchanger 2                                                   | Hs.171458 |
| 204459_at    | 3hISvsC_down_Common         | CSTF2                | -1.25 | -1.26 | Xq22.1               | cleavage stimulation factor, 3' pre-RNA, subunit 2, 64kDa                              | Hs.132370 |
| 207681_at    | 3hISvsC_down_Common         | CXCR3                | -1.45 | -1.42 | Xq13                 | chemokine (C-X-C motif) receptor 3                                                     | Hs.198252 |
| 208723_at    | 3hISvsC_down_Common         | USP11                | -1.29 | -1.30 | Xp11.23              | ubiquitin specific peptidase 11                                                        | Hs.171501 |
| 209014_at    | 3hISvsC_down_Common         | MAGED1               | -1.31 | -1.28 | Xp11.23              | melanoma antigen family D, 1                                                           | Hs.5258   |
| 219433_at    | 3hISvsC_down_Common         | BCOR                 | -1.28 | -1.46 | Xp21.2-p11.4         | BCL6 co-repressor                                                                      | Hs.659681 |

# SUPPLEMENTAL MATERIAL

**Supplementary Table 1. Genes differential expressed between 3h ischemic stroke (3hIS) and non-stroke controls ( C ) ( $\alpha \leq 0.05$ , fold change  $\geq |1.2|$ )**

| Probeset ID  | DE list                   | Gene Symbol         | Fold Change                  |                                  | Cytoband          | Gene Title                                                                 | UniGene ID |
|--------------|---------------------------|---------------------|------------------------------|----------------------------------|-------------------|----------------------------------------------------------------------------|------------|
|              |                           |                     | IS * Male vs. Control * Male | IS * Female vs. Control * Female |                   |                                                                            |            |
| 1553007_a_at | 3hISvsC_up_MaleSpecific   | ODZ1                | 1.38                         | NA                               | Xq25              | odz, odd Oz/ten-m homolog 1(Drosophila)                                    | Hs.23796   |
| 1554206_at   | 3hISvsC_up_MaleSpecific   | TMLHE               | 1.39                         | NA                               | Xq28              | trimethyllysine hydroxylase, epsilor                                       | Hs.133321  |
| 1559510_at   | 3hISvsC_up_MaleSpecific   | BHLHB9              | 1.51                         | NA                               | Xq23              | Basic helix-loop-helix domain containing, class B, 9                       | Hs.4276    |
| 201472_at    | 3hISvsC_up_MaleSpecific   | VBP1                | 1.35                         | NA                               | Xq28              | von Hippel-Lindau binding protein 1                                        | Hs.436803  |
| 202105_at    | 3hISvsC_up_MaleSpecific   | IGBP1               | 1.23                         | NA                               | Xq13.1-q13.3      | immunoglobulin (CD79A) binding protein 1                                   | Hs.496267  |
| 206696_at    | 3hISvsC_up_MaleSpecific   | GPR143              | 1.33                         | NA                               | Xp22.3            | G protein-coupled receptor 143                                             | Hs.74124   |
| 209022_at    | 3hISvsC_up_MaleSpecific   | STAG2               | 1.31                         | NA                               | Xq25              | stromal antigen 2                                                          | Hs.496710  |
| 214009_at    | 3hISvsC_up_MaleSpecific   | MSL3L1              | 1.40                         | NA                               | Xp22.3            | male-specific lethal 3 homolog (Drosophila)                                | Hs.655288  |
| 214681_at    | 3hISvsC_up_MaleSpecific   | GK                  | 1.51                         | NA                               | Xp21.3            | glycerol kinase                                                            | Hs.1466    |
| 219771_at    | 3hISvsC_up_MaleSpecific   | TBC1D8B             | 1.56                         | NA                               | Xq22.3            | TBC1 domain family, member 8B (with GRAM domain)                           | Hs.351798  |
| 226335_at    | 3hISvsC_up_MaleSpecific   | RPS6KA3             | 1.28                         | NA                               | Xp22.2-p22.1      | ribosomal protein S6 kinase, 90kDa, polypeptide 3                          | Hs.445387  |
| 228968_at    | 3hISvsC_up_MaleSpecific   | ZNF449              | 1.31                         | NA                               | Xq26.3            | zinc finger protein 449                                                    | Hs.28780   |
| 230866_at    | 3hISvsC_up_MaleSpecific   | CYSLTR1             | 1.39                         | NA                               | Xq13.2-q21.1      | cysteinyl leukotriene receptor 1                                           | Hs.201300  |
| 231747_at    | 3hISvsC_up_MaleSpecific   | CYSLTR1             | 1.23                         | NA                               | Xq13.2-q21.1      | cysteinyl leukotriene receptor 1                                           | Hs.201300  |
| 232087_at    | 3hISvsC_up_MaleSpecific   | CXorf23             | 1.61                         | NA                               | Xp22.12           | chromosome X open reading frame 23                                         | Hs.28896   |
| 232157_at    | 3hISvsC_up_MaleSpecific   | SPRY3               | 1.45                         | NA                               | Xq28 and Yq12     | sprouty homolog 3 (Drosophila)                                             | Hs.381912  |
| 236165_at    | 3hISvsC_up_MaleSpecific   | MSL3L1              | 1.48                         | NA                               | ---               | ---                                                                        | ---        |
| 238053_at    | 3hISvsC_up_MaleSpecific   | DHRX                | 1.44                         | NA                               | Xp22.33; Yp11.2   | dehydrogenase/reductase (SDR family) X-linkec                              | Hs.131452  |
| 238989_at    | 3hISvsC_up_MaleSpecific   | C1GALT1C1           | 1.44                         | NA                               | Xq24              | C1GALT1-specific chaperone 1                                               | Hs.643920  |
| 242931_at    | 3hISvsC_up_MaleSpecific   | LONRF3              | 1.38                         | NA                               | Xq24              | LON peptidase N-terminal domain and ring finger 3                          | Hs.144266  |
| 243683_at    | 3hISvsC_up_MaleSpecific   | MORF4L2             | 1.71                         | NA                               | Xq22              | Mortality factor 4 like 2                                                  | Hs.326387  |
| 244470_at    | 3hISvsC_up_MaleSpecific   | RNF12               | 1.27                         | NA                               | Xq13-q21          | Ring finger protein, LIM domain interacting                                | Hs.653288  |
| 1552927_at   | 3hISvsC_up_FemaleSpecific | MAP3K7IP3           | NA                           | 1.48                             | Xp21.2            | TGF-beta activated kinase 1/MAP3K7 binding protein 3                       | Hs.188256  |
| 1557726_at   | 3hISvsC_up_FemaleSpecific | ARMCX4              | NA                           | 1.21                             | Xq22.1            | armadillo repeat containing, X-linked 4                                    | Hs.9728    |
| 1557880_at   | 3hISvsC_up_FemaleSpecific | PCDH11X /// PCDH11Y | NA                           | 1.33                             | Xq21.3 /// Yp11.2 | protocadherin 11 X-linked /// protocadherin 11 Y-linkec                    | Hs.661308  |
| 1562805_at   | 3hISvsC_up_FemaleSpecific | LOC349408           | NA                           | 1.43                             | Xp22.31           | hypothetical LOC349408                                                     | Hs.685035  |
| 1565446_at   | 3hISvsC_up_FemaleSpecific | HPRT1               | NA                           | 1.22                             | Xq26.1            | Hypoxanthine phosphoribosyltransferase 1                                   | Hs.412707  |
| 201210_at    | 3hISvsC_up_FemaleSpecific | DDX3X               | NA                           | 1.20                             | Xp11.3-p11.23     | DEAD (Asp-Glu-Ala-Asp) box polypeptide 3, X-linkec                         | Hs.380774  |
| 201666_at    | 3hISvsC_up_FemaleSpecific | TIMP1               | NA                           | 1.29                             | Xp11.3-p11.23     | TIMP metalloproteinase inhibitor 1                                         | Hs.522632  |
| 205645_at    | 3hISvsC_up_FemaleSpecific | REPS2               | NA                           | 1.55                             | Xp22.2-p22.13     | RALBP1 associated Eps domain containing 2                                  | Hs.186810  |
| 206002_at    | 3hISvsC_up_FemaleSpecific | GPR64               | NA                           | 1.31                             | Xp22.13           | G protein-coupled receptor 64                                              | Hs.146978  |
| 210274_at    | 3hISvsC_up_FemaleSpecific | MAGEA8              | NA                           | 1.22                             | Xq28              | melanoma antigen family A, 8                                               | Hs.522803  |
| 212340_at    | 3hISvsC_up_FemaleSpecific | YIPF6               | NA                           | 1.45                             | Xq12              | Yip1 domain family, member 6                                               | Hs.82719   |
| 212457_at    | 3hISvsC_up_FemaleSpecific | TFE3                | NA                           | 1.22                             | Xp11.22           | transcription factor binding to IGHM enhancer 3                            | Hs.274184  |
| 212741_at    | 3hISvsC_up_FemaleSpecific | MAOA                | NA                           | 2.67                             | Xp11.3            | monoamine oxidase A                                                        | Hs.183109  |
| 216722_at    | 3hISvsC_up_FemaleSpecific | VENTXP1             | NA                           | 1.21                             | Xp21.3            | VENT homeobox (Xenopus laevis) pseudogene 1                                | Hs.447377  |
| 230030_at    | 3hISvsC_up_FemaleSpecific | HS6ST2              | NA                           | 1.28                             | Xq26.2            | heparan sulfate 6-O-sulfotransferase 2                                     | Hs.385956  |
| 244825_at    | 3hISvsC_up_FemaleSpecific | SHROOM4             | NA                           | 1.59                             | Xp11.22           | shroom family member 4                                                     | Hs.420541  |
| 200737_at    | 3hISvsC_up_Common         | PGK1                | 1.28                         | 1.34                             | Xq13              | phosphoglycerate kinase 1                                                  | Hs.78771   |
| 200821_at    | 3hISvsC_up_Common         | LAMP2               | 1.33                         | 1.37                             | Xq24              | lysosomal-associated membrane protein 2                                    | Hs.496684  |
| 201099_at    | 3hISvsC_up_Common         | USP9X               | 1.34                         | 1.29                             | Xp11.4            | ubiquitin specific peptidase 9, X-linkec                                   | Hs.77578   |
| 201132_at    | 3hISvsC_up_Common         | HNRNPH2             | 1.34                         | 1.41                             | Xq22              | heterogeneous nuclear ribonucleoprotein H2 (H <sup>2</sup> )               | Hs.632828  |
| 201136_at    | 3hISvsC_up_Common         | PLP2                | 1.32                         | 1.34                             | Xp11.23           | proteolipid protein 2 (colonic epithelium-enriched)                        | Hs.77422   |
| 201406_at    | 3hISvsC_up_Common         | RPL36A              | 1.74                         | 1.69                             | Xq22.1            | ribosomal protein L36a                                                     | Hs.432485  |
| 202110_at    | 3hISvsC_up_Common         | COX7B               | 1.79                         | 1.81                             | Xq21.1            | cytochrome c oxidase subunit VIIb                                          | Hs.522699  |
| 202298_at    | 3hISvsC_up_Common         | NDUFA1              | 1.42                         | 1.31                             | Xq24              | NADH dehydrogenase (ubiquinone) 1 alpha subcomplex, 1, 7.5kDa              | Hs.534168  |
| 203042_at    | 3hISvsC_up_Common         | LAMP2               | 1.30                         | 1.39                             | Xq24              | lysosomal-associated membrane protein 2                                    | Hs.496684  |
| 206464_at    | 3hISvsC_up_Common         | BMX                 | 2.42                         | 3.40                             | Xp22.2            | BMX non-receptor tyrosine kinase                                           | Hs.495731  |
| 217383_at    | 3hISvsC_up_Common         | PGK1                | 1.28                         | 1.34                             | Xq13              | Phosphoglycerate kinase 1                                                  | Hs.78771   |
| 218163_at    | 3hISvsC_up_Common         | MCTS1               | 1.33                         | 1.27                             | Xq22-q24          | malignant T cell amplified sequence 1                                      | Hs.102696  |
| 219283_at    | 3hISvsC_up_Common         | C1GALT1C1           | 1.44                         | 1.38                             | Xq24              | C1GALT1-specific chaperone 1                                               | Hs.643920  |
| 220832_at    | 3hISvsC_up_Common         | TLR8                | 1.32                         | 1.34                             | Xp22              | toll-like receptor 8                                                       | Hs.660543  |
| 221895_at    | 3hISvsC_up_Common         | MOSPD2              | 1.32                         | 1.31                             | Xp22.2            | motile sperm domain containing 2                                           | Hs.190043  |
| 222815_at    | 3hISvsC_up_Common         | RNF12               | 1.31                         | 1.33                             | Xq13-q21          | ring finger protein, LIM domain interacting                                | Hs.653288  |
| 223439_at    | 3hISvsC_up_Common         | NKAP                | 1.27                         | 1.25                             | Xq24              | NFKB activating protein                                                    | Hs.522771  |
| 225154_at    | 3hISvsC_up_Common         | SYAP1               | 1.32                         | 1.39                             | Xp22.2            | synapse associated protein 1, SAP47 homolog (Drosophila)                   | Hs.489336  |
| 226671_at    | 3hISvsC_up_Common         | LAMP2               | 1.60                         | 1.57                             | Xq24              | lysosomal-associated membrane protein 2                                    | Hs.496684  |
| 226875_at    | 3hISvsC_up_Common         | DOCK11              | 1.26                         | 1.25                             | Xq24              | dedicator of cytokinesis 11                                                | Hs.368203  |
| 227357_at    | 3hISvsC_up_Common         | MAP3K7IP3           | 1.43                         | 1.34                             | Xp21.2            | TGF-beta activated kinase 1/MAP3K7 binding protein 3                       | Hs.188256  |
| 227425_at    | 3hISvsC_up_Common         | REPS2               | 1.73                         | 1.77                             | Xp22.2-p22.13     | RALBP1 associated Eps domain containing 2                                  | Hs.186810  |
| 229560_at    | 3hISvsC_up_Common         | TLR8                | 1.30                         | 1.47                             | Xp22              | toll-like receptor 8                                                       | Hs.660543  |
| 230532_at    | 3hISvsC_up_Common         | CXorf38             | 1.41                         | 1.27                             | Xp11.4            | chromosome X open reading frame 38                                         | Hs.495961  |
| 233082_at    | 3hISvsC_up_Common         | ZNF182 /// ZNF630   | 1.95                         | 1.80                             | Xp11.3-p11.1      | zinc finger protein 630                                                    | Hs.650883  |
| 243201_at    | 3hISvsC_up_Common         | HNRNPH2             | 1.48                         | 1.33                             | Xq22              | Heterogeneous nuclear ribonucleoprotein H2 (H <sup>2</sup> )               | Hs.632828  |
| 64883_at     | 3hISvsC_up_Common         | MOSPD2              | 1.46                         | 1.40                             | Xp22.2            | motile sperm domain containing 2                                           | Hs.190043  |
| 1555590_a_at | 3hISvsC_down_MaleSpecific | GATA1               | -1.70                        | NA                               | Xp11.23           | GATA binding protein 1 (globin transcription factor 1)                     | Hs.765     |
| 202219_at    | 3hISvsC_down_MaleSpecific | SLC6A8              | -1.82                        | NA                               | Xq28              | solute carrier family 6 (neurotransmitter transporter, creatine), member 8 | Hs.540696  |
| 202711_at    | 3hISvsC_down_MaleSpecific | EFNB1               | -1.25                        | NA                               | Xq12              | ephrin-B1                                                                  | Hs.144700  |
| 206868_at    | 3hISvsC_down_MaleSpecific | STARDB8             | -1.20                        | NA                               | Xq13.1            | STAR-related lipid transfer (START) domain containing 8                    | Hs.95140   |
| 210446_at    | 3hISvsC_down_MaleSpecific | GATA1               | -1.52                        | NA                               | Xp11.23           | GATA binding protein 1 (globin transcription factor 1)                     | Hs.765     |
| 219814_at    | 3hISvsC_down_MaleSpecific | MBNL3               | -1.54                        | NA                               | Xq26.2            | muscleblind-like 3 (Drosophila)                                            | Hs.105134  |

|              |                             |                      |       |       |                      |                                                                                        |           |
|--------------|-----------------------------|----------------------|-------|-------|----------------------|----------------------------------------------------------------------------------------|-----------|
| 1552671_a_at | 3hISvsC_down_FemaleSpecific | SLC9A7               | NA    | -1.27 | Xp11.3-p11.23 Xp11.3 | solute carrier family 9 (sodium/hydrogen exchanger), member 7                          | Hs.496057 |
| 1552882_a_at | 3hISvsC_down_FemaleSpecific | FAM123B              | NA    | -1.50 | Xq11.2               | family with sequence similarity 123E                                                   | Hs.314225 |
| 1553998_at   | 3hISvsC_down_FemaleSpecific | DMRTC1 /// LOC728656 | NA    | -1.75 | Xq13.2               | DMRT-like family C1 /// DMRT-like family C1E                                           | Hs.712728 |
| 1555882_at   | 3hISvsC_down_FemaleSpecific | SPIN3                | NA    | -1.40 | Xp11.21              | spindlin family, member 3                                                              | Hs.522672 |
| 1561660_at   | 3hISvsC_down_FemaleSpecific | MCART6               | NA    | -1.96 | Xq22.2               | mitochondrial carrier triple repeat 6                                                  | Hs.660022 |
| 201540_at    | 3hISvsC_down_FemaleSpecific | FHL1                 | NA    | -1.35 | Xq26                 | four and a half LIM domains 1                                                          | Hs.435369 |
| 209167_at    | 3hISvsC_down_FemaleSpecific | GPM6B                | NA    | -1.68 | Xp22.2               | glycoprotein M6B                                                                       | Hs.495710 |
| 213289_at    | 3hISvsC_down_FemaleSpecific | APOOL                | NA    | -1.58 | Xq21.1               | Apolipoprotein O-like                                                                  | Hs.512181 |
| 214607_at    | 3hISvsC_down_FemaleSpecific | PAK3                 | NA    | -1.64 | Xq23                 | p21 protein (Cdc42/Rac)-activated kinase 3                                             | Hs.656789 |
| 218012_at    | 3hISvsC_down_FemaleSpecific | TSPYL2               | NA    | -1.29 | Xp11.2               | TSPY-like 2                                                                            | Hs.136164 |
| 223915_at    | 3hISvsC_down_FemaleSpecific | BCOR                 | NA    | -1.37 | Xp21.2-p11.4         | BCL6 co-repressor                                                                      | Hs.659681 |
| 224589_at    | 3hISvsC_down_FemaleSpecific | XIST                 | NA    | -1.48 | Xq13.2               | X (inactive)-specific transcript (non-protein coding)                                  | ---       |
| 225028_at    | 3hISvsC_down_FemaleSpecific | LOC550643            | NA    | -1.50 | Xp11.1               | hypothetical LOC550643                                                                 | Hs.355559 |
| 225382_at    | 3hISvsC_down_FemaleSpecific | ZNF275               | NA    | -1.23 | Xq28                 | zinc finger protein 275                                                                | Hs.348963 |
| 225383_at    | 3hISvsC_down_FemaleSpecific | ZNF275               | NA    | -1.43 | Xq28                 | zinc finger protein 275                                                                | Hs.348963 |
| 228005_at    | 3hISvsC_down_FemaleSpecific | ZXDB                 | NA    | -1.44 | Xp11.21              | zinc finger, X-linked, duplicated B                                                    | Hs.156257 |
| 229234_at    | 3hISvsC_down_FemaleSpecific | ZC3H12B              | NA    | -1.46 | Xq12                 | zinc finger CCCH-type containing 12B                                                   | Hs.21249  |
| 229286_at    | 3hISvsC_down_FemaleSpecific | MAGEE1               | NA    | -1.55 | Xq13.3               | melanoma antigen family E, 1                                                           | Hs.8453   |
| 229365_at    | 3hISvsC_down_FemaleSpecific | PPP1R3F              | NA    | -1.34 | Xp11.23              | similar to protein phosphatase 1, regulatory (inhibitor) subunit 3F /// protein phosph | Hs.433652 |
| 230224_at    | 3hISvsC_down_FemaleSpecific | ZCCHC18              | NA    | -1.54 | Xq22.2               | zinc finger, CCHC domain containing 18                                                 | Hs.648338 |
| 235433_at    | 3hISvsC_down_FemaleSpecific | APOOL                | NA    | -1.53 | Xq21.1               | apolipoprotein O-like                                                                  | Hs.512181 |
| 235520_at    | 3hISvsC_down_FemaleSpecific | ZNF280C              | NA    | -1.51 | Xq26.1               | zinc finger protein 280C                                                               | Hs.308418 |
| 236294_at    | 3hISvsC_down_FemaleSpecific | HUWE1                | NA    | -1.29 | Xp11.22              | HECT, UBA and WWE domain containing 1                                                  | Hs.136905 |
| 239034_at    | 3hISvsC_down_FemaleSpecific | CXorf24              | NA    | -1.33 | Xp11.23              | chromosome X open reading frame 24                                                     | Hs.597617 |
| 243764_at    | 3hISvsC_down_FemaleSpecific | VSIG1                | NA    | -1.62 | Xq22.3               | V-set and immunoglobulin domain containing 1                                           | Hs.177164 |
| 32042_at     | 3hISvsC_down_FemaleSpecific | ENOX2                | NA    | -1.24 | Xq25-q26.2           | ecto-NOX disulfide-thiol exchanger 2                                                   | Hs.171458 |
| 204459_at    | 3hISvsC_down_Common         | CSTF2                | -1.25 | -1.26 | Xq22.1               | cleavage stimulation factor, 3' pre-RNA, subunit 2, 64kDa                              | Hs.132370 |
| 207681_at    | 3hISvsC_down_Common         | CXCR3                | -1.45 | -1.42 | Xq13                 | chemokine (C-X-C motif) receptor 3                                                     | Hs.198252 |
| 208723_at    | 3hISvsC_down_Common         | USP11                | -1.29 | -1.30 | Xp11.23              | ubiquitin specific peptidase 11                                                        | Hs.171501 |
| 209014_at    | 3hISvsC_down_Common         | MAGED1               | -1.31 | -1.28 | Xp11.23              | melanoma antigen family D, 1                                                           | Hs.5258   |
| 219433_at    | 3hISvsC_down_Common         | BCOR                 | -1.28 | -1.46 | Xp21.2-p11.4         | BCL6 co-repressor                                                                      | Hs.659681 |



# SUPPLEMENTAL MATERIAL

**Supplementary Table 1. Genes differential expressed between 3h ischemic stroke (3hIS) and non-stroke controls ( C) ( $\alpha \leq 0.05$ , fold change  $\geq |1.2|$ )**

| Probeset ID  | DE list                   | Gene Symbol         | Fold Change                  |                                  | Cytoband          | Gene Title                                                                 | UniGene ID |
|--------------|---------------------------|---------------------|------------------------------|----------------------------------|-------------------|----------------------------------------------------------------------------|------------|
|              |                           |                     | IS * Male vs. Control * Male | IS * Female vs. Control * Female |                   |                                                                            |            |
| 1553007_a_at | 3hISvsC_up_MaleSpecific   | ODZ1                | 1.38                         | NA                               | Xq25              | odz, odd Oz/ten-m homolog 1(Drosophila)                                    | Hs.23796   |
| 1554206_at   | 3hISvsC_up_MaleSpecific   | TMLHE               | 1.39                         | NA                               | Xq28              | trimethyllysine hydroxylase, epsilor                                       | Hs.133321  |
| 1559510_at   | 3hISvsC_up_MaleSpecific   | BHLHB9              | 1.51                         | NA                               | Xq23              | Basic helix-loop-helix domain containing, class B, 9                       | Hs.4276    |
| 201472_at    | 3hISvsC_up_MaleSpecific   | VBP1                | 1.35                         | NA                               | Xq28              | von Hippel-Lindau binding protein 1                                        | Hs.436803  |
| 202105_at    | 3hISvsC_up_MaleSpecific   | IGBP1               | 1.23                         | NA                               | Xq13.1-q13.3      | immunoglobulin (CD79A) binding protein 1                                   | Hs.496267  |
| 206696_at    | 3hISvsC_up_MaleSpecific   | GPR143              | 1.33                         | NA                               | Xp22.3            | G protein-coupled receptor 143                                             | Hs.74124   |
| 209022_at    | 3hISvsC_up_MaleSpecific   | STAG2               | 1.31                         | NA                               | Xq25              | stromal antigen 2                                                          | Hs.496710  |
| 214009_at    | 3hISvsC_up_MaleSpecific   | MSL3L1              | 1.40                         | NA                               | Xp22.3            | male-specific lethal 3 homolog (Drosophila)                                | Hs.655288  |
| 214681_at    | 3hISvsC_up_MaleSpecific   | GK                  | 1.51                         | NA                               | Xp21.3            | glycerol kinase                                                            | Hs.1466    |
| 219771_at    | 3hISvsC_up_MaleSpecific   | TBC1D8B             | 1.56                         | NA                               | Xq22.3            | TBC1 domain family, member 8B (with GRAM domain)                           | Hs.351798  |
| 226335_at    | 3hISvsC_up_MaleSpecific   | RPS6KA3             | 1.28                         | NA                               | Xp22.2-p22.1      | ribosomal protein S6 kinase, 90kDa, polypeptide 3                          | Hs.445387  |
| 228968_at    | 3hISvsC_up_MaleSpecific   | ZNF449              | 1.31                         | NA                               | Xq26.3            | zinc finger protein 449                                                    | Hs.28780   |
| 230866_at    | 3hISvsC_up_MaleSpecific   | CYSLTR1             | 1.39                         | NA                               | Xq13.2-q21.1      | cysteinyl leukotriene receptor 1                                           | Hs.201300  |
| 231747_at    | 3hISvsC_up_MaleSpecific   | CYSLTR1             | 1.23                         | NA                               | Xq13.2-q21.1      | cysteinyl leukotriene receptor 1                                           | Hs.201300  |
| 232087_at    | 3hISvsC_up_MaleSpecific   | CXorf23             | 1.61                         | NA                               | Xp22.12           | chromosome X open reading frame 23                                         | Hs.28896   |
| 232157_at    | 3hISvsC_up_MaleSpecific   | SPRY3               | 1.45                         | NA                               | Xq28 and Yq12     | sprouty homolog 3 (Drosophila)                                             | Hs.381912  |
| 236165_at    | 3hISvsC_up_MaleSpecific   | MSL3L1              | 1.48                         | NA                               | ---               | ---                                                                        | ---        |
| 238053_at    | 3hISvsC_up_MaleSpecific   | DHRX                | 1.44                         | NA                               | Xp22.33; Yp11.2   | dehydrogenase/reductase (SDR family) X-linkec                              | Hs.131452  |
| 238989_at    | 3hISvsC_up_MaleSpecific   | C1GALT1C1           | 1.44                         | NA                               | Xq24              | C1GALT1-specific chaperone 1                                               | Hs.643920  |
| 242931_at    | 3hISvsC_up_MaleSpecific   | LONRF3              | 1.38                         | NA                               | Xq24              | LON peptidase N-terminal domain and ring finger 3                          | Hs.144266  |
| 243683_at    | 3hISvsC_up_MaleSpecific   | MORF4L2             | 1.71                         | NA                               | Xq22              | Mortality factor 4 like 2                                                  | Hs.326387  |
| 244470_at    | 3hISvsC_up_MaleSpecific   | RNF12               | 1.27                         | NA                               | Xq13-q21          | Ring finger protein, LIM domain interacting                                | Hs.653288  |
| 1552927_at   | 3hISvsC_up_FemaleSpecific | MAP3K7IP3           | NA                           | 1.48                             | Xp21.2            | TGF-beta activated kinase 1/MAP3K7 binding protein 3                       | Hs.188256  |
| 1557726_at   | 3hISvsC_up_FemaleSpecific | ARMCX4              | NA                           | 1.21                             | Xq22.1            | armadillo repeat containing, X-linked 4                                    | Hs.9728    |
| 1557880_at   | 3hISvsC_up_FemaleSpecific | PCDH11X /// PCDH11Y | NA                           | 1.33                             | Xq21.3 /// Yp11.2 | protocadherin 11 X-linked /// protocadherin 11 Y-linkec                    | Hs.661308  |
| 1562805_at   | 3hISvsC_up_FemaleSpecific | LOC349408           | NA                           | 1.43                             | Xp22.31           | hypothetical LOC349408                                                     | Hs.685035  |
| 1565446_at   | 3hISvsC_up_FemaleSpecific | HPRT1               | NA                           | 1.22                             | Xq26.1            | Hypoxanthine phosphoribosyltransferase 1                                   | Hs.412707  |
| 201210_at    | 3hISvsC_up_FemaleSpecific | DDX3X               | NA                           | 1.20                             | Xp11.3-p11.23     | DEAD (Asp-Glu-Ala-Asp) box polypeptide 3, X-linkec                         | Hs.380774  |
| 201666_at    | 3hISvsC_up_FemaleSpecific | TIMP1               | NA                           | 1.29                             | Xp11.3-p11.23     | TIMP metalloproteinase inhibitor 1                                         | Hs.522632  |
| 205645_at    | 3hISvsC_up_FemaleSpecific | REPS2               | NA                           | 1.55                             | Xp22.2-p22.13     | RALBP1 associated Eps domain containing 2                                  | Hs.186810  |
| 206002_at    | 3hISvsC_up_FemaleSpecific | GPR64               | NA                           | 1.31                             | Xp22.13           | G protein-coupled receptor 64                                              | Hs.146978  |
| 210274_at    | 3hISvsC_up_FemaleSpecific | MAGEA8              | NA                           | 1.22                             | Xq28              | melanoma antigen family A, 8                                               | Hs.522803  |
| 212340_at    | 3hISvsC_up_FemaleSpecific | YIPF6               | NA                           | 1.45                             | Xq12              | Yip1 domain family, member 6                                               | Hs.82719   |
| 212457_at    | 3hISvsC_up_FemaleSpecific | TFE3                | NA                           | 1.22                             | Xp11.22           | transcription factor binding to IGHM enhancer 3                            | Hs.274184  |
| 212741_at    | 3hISvsC_up_FemaleSpecific | MAOA                | NA                           | 2.67                             | Xp11.3            | monoamine oxidase A                                                        | Hs.183109  |
| 216722_at    | 3hISvsC_up_FemaleSpecific | VENTXP1             | NA                           | 1.21                             | Xp21.3            | VENT homeobox (Xenopus laevis) pseudogene 1                                | Hs.447377  |
| 230030_at    | 3hISvsC_up_FemaleSpecific | HS6ST2              | NA                           | 1.28                             | Xq26.2            | heparan sulfate 6-O-sulfotransferase 2                                     | Hs.385956  |
| 244825_at    | 3hISvsC_up_FemaleSpecific | SHROOM4             | NA                           | 1.59                             | Xp11.22           | shroom family member 4                                                     | Hs.420541  |
| 200737_at    | 3hISvsC_up_Common         | PGK1                | 1.28                         | 1.34                             | Xq13              | phosphoglycerate kinase 1                                                  | Hs.78771   |
| 200821_at    | 3hISvsC_up_Common         | LAMP2               | 1.33                         | 1.37                             | Xq24              | lysosomal-associated membrane protein 2                                    | Hs.496684  |
| 201099_at    | 3hISvsC_up_Common         | USP9X               | 1.34                         | 1.29                             | Xp11.4            | ubiquitin specific peptidase 9, X-linkec                                   | Hs.77578   |
| 201132_at    | 3hISvsC_up_Common         | HNRNPH2             | 1.34                         | 1.41                             | Xq22              | heterogeneous nuclear ribonucleoprotein H2 (H <sup>+</sup> )               | Hs.632828  |
| 201136_at    | 3hISvsC_up_Common         | PLP2                | 1.32                         | 1.34                             | Xp11.23           | proteolipid protein 2 (colonic epithelium-enriched)                        | Hs.77422   |
| 201406_at    | 3hISvsC_up_Common         | RPL36A              | 1.74                         | 1.69                             | Xq22.1            | ribosomal protein L36a                                                     | Hs.432485  |
| 202110_at    | 3hISvsC_up_Common         | COX7B               | 1.79                         | 1.81                             | Xq21.1            | cytochrome c oxidase subunit VIIb                                          | Hs.522699  |
| 202298_at    | 3hISvsC_up_Common         | NDUFA1              | 1.42                         | 1.31                             | Xq24              | NADH dehydrogenase (ubiquinone) 1 alpha subcomplex, 1, 7.5kDa              | Hs.534168  |
| 203042_at    | 3hISvsC_up_Common         | LAMP2               | 1.30                         | 1.39                             | Xq24              | lysosomal-associated membrane protein 2                                    | Hs.496684  |
| 206464_at    | 3hISvsC_up_Common         | BMX                 | 2.42                         | 3.40                             | Xp22.2            | BMX non-receptor tyrosine kinase                                           | Hs.495731  |
| 217383_at    | 3hISvsC_up_Common         | PGK1                | 1.28                         | 1.34                             | Xq13              | Phosphoglycerate kinase 1                                                  | Hs.78771   |
| 218163_at    | 3hISvsC_up_Common         | MCTS1               | 1.33                         | 1.27                             | Xq22-q24          | malignant T cell amplified sequence 1                                      | Hs.102696  |
| 219283_at    | 3hISvsC_up_Common         | C1GALT1C1           | 1.44                         | 1.38                             | Xq24              | C1GALT1-specific chaperone 1                                               | Hs.643920  |
| 220832_at    | 3hISvsC_up_Common         | TLR8                | 1.32                         | 1.34                             | Xp22              | toll-like receptor 8                                                       | Hs.660543  |
| 221895_at    | 3hISvsC_up_Common         | MOSPD2              | 1.32                         | 1.31                             | Xp22.2            | motile sperm domain containing 2                                           | Hs.190043  |
| 222815_at    | 3hISvsC_up_Common         | RNF12               | 1.31                         | 1.33                             | Xq13-q21          | ring finger protein, LIM domain interacting                                | Hs.653288  |
| 223439_at    | 3hISvsC_up_Common         | NKAP                | 1.27                         | 1.25                             | Xq24              | NFKB activating protein                                                    | Hs.522771  |
| 225154_at    | 3hISvsC_up_Common         | SYAP1               | 1.32                         | 1.39                             | Xp22.2            | synapse associated protein 1, SAP47 homolog (Drosophila)                   | Hs.489336  |
| 226671_at    | 3hISvsC_up_Common         | LAMP2               | 1.60                         | 1.57                             | Xq24              | lysosomal-associated membrane protein 2                                    | Hs.496684  |
| 226875_at    | 3hISvsC_up_Common         | DOCK11              | 1.26                         | 1.25                             | Xq24              | dedicator of cytokinesis 11                                                | Hs.368203  |
| 227357_at    | 3hISvsC_up_Common         | MAP3K7IP3           | 1.43                         | 1.34                             | Xp21.2            | TGF-beta activated kinase 1/MAP3K7 binding protein 3                       | Hs.188256  |
| 227425_at    | 3hISvsC_up_Common         | REPS2               | 1.73                         | 1.77                             | Xp22.2-p22.13     | RALBP1 associated Eps domain containing 2                                  | Hs.186810  |
| 229560_at    | 3hISvsC_up_Common         | TLR8                | 1.30                         | 1.47                             | Xp22              | toll-like receptor 8                                                       | Hs.660543  |
| 230532_at    | 3hISvsC_up_Common         | CXorf38             | 1.41                         | 1.27                             | Xp11.4            | chromosome X open reading frame 38                                         | Hs.495961  |
| 233082_at    | 3hISvsC_up_Common         | ZNF182 /// ZNF630   | 1.95                         | 1.80                             | Xp11.3-p11.1      | zinc finger protein 630                                                    | Hs.650883  |
| 243201_at    | 3hISvsC_up_Common         | HNRNPH2             | 1.48                         | 1.33                             | Xq22              | Heterogeneous nuclear ribonucleoprotein H2 (H <sup>+</sup> )               | Hs.632828  |
| 64883_at     | 3hISvsC_up_Common         | MOSPD2              | 1.46                         | 1.40                             | Xp22.2            | motile sperm domain containing 2                                           | Hs.190043  |
| 1555590_a_at | 3hISvsC_down_MaleSpecific | GATA1               | -1.70                        | NA                               | Xp11.23           | GATA binding protein 1 (globin transcription factor 1)                     | Hs.765     |
| 202219_at    | 3hISvsC_down_MaleSpecific | SLC6A8              | -1.82                        | NA                               | Xq28              | solute carrier family 6 (neurotransmitter transporter, creatine), member 8 | Hs.540696  |
| 202711_at    | 3hISvsC_down_MaleSpecific | EFNB1               | -1.25                        | NA                               | Xq12              | ephrin-B1                                                                  | Hs.144700  |
| 206868_at    | 3hISvsC_down_MaleSpecific | STARDB8             | -1.20                        | NA                               | Xq13.1            | STAR-related lipid transfer (START) domain containing 8                    | Hs.95140   |
| 210446_at    | 3hISvsC_down_MaleSpecific | GATA1               | -1.52                        | NA                               | Xp11.23           | GATA binding protein 1 (globin transcription factor 1)                     | Hs.765     |
| 219814_at    | 3hISvsC_down_MaleSpecific | MBNL3               | -1.54                        | NA                               | Xq26.2            | muscleblind-like 3 (Drosophila)                                            | Hs.105134  |

|              |                             |                      |       |       |                      |                                                                                        |           |
|--------------|-----------------------------|----------------------|-------|-------|----------------------|----------------------------------------------------------------------------------------|-----------|
| 1552671_a_at | 3hISvsC_down_FemaleSpecific | SLC9A7               | NA    | -1.27 | Xp11.3-p11.23 Xp11.3 | solute carrier family 9 (sodium/hydrogen exchanger), member 7                          | Hs.496057 |
| 1552882_a_at | 3hISvsC_down_FemaleSpecific | FAM123B              | NA    | -1.50 | Xq11.2               | family with sequence similarity 123E                                                   | Hs.314225 |
| 1553998_at   | 3hISvsC_down_FemaleSpecific | DMRTC1 /// LOC728656 | NA    | -1.75 | Xq13.2               | DMRT-like family C1 /// DMRT-like family C1E                                           | Hs.712728 |
| 1555882_at   | 3hISvsC_down_FemaleSpecific | SPIN3                | NA    | -1.40 | Xp11.21              | spindlin family, member 3                                                              | Hs.522672 |
| 1561660_at   | 3hISvsC_down_FemaleSpecific | MCART6               | NA    | -1.96 | Xq22.2               | mitochondrial carrier triple repeat 6                                                  | Hs.660022 |
| 201540_at    | 3hISvsC_down_FemaleSpecific | FHL1                 | NA    | -1.35 | Xq26                 | four and a half LIM domains 1                                                          | Hs.435369 |
| 209167_at    | 3hISvsC_down_FemaleSpecific | GPM6B                | NA    | -1.68 | Xp22.2               | glycoprotein M6B                                                                       | Hs.495710 |
| 213289_at    | 3hISvsC_down_FemaleSpecific | APOOL                | NA    | -1.58 | Xq21.1               | Apolipoprotein O-like                                                                  | Hs.512181 |
| 214607_at    | 3hISvsC_down_FemaleSpecific | PAK3                 | NA    | -1.64 | Xq23                 | p21 protein (Cdc42/Rac)-activated kinase 3                                             | Hs.656789 |
| 218012_at    | 3hISvsC_down_FemaleSpecific | TSPYL2               | NA    | -1.29 | Xp11.2               | TSPY-like 2                                                                            | Hs.136164 |
| 223915_at    | 3hISvsC_down_FemaleSpecific | BCOR                 | NA    | -1.37 | Xp21.2-p11.4         | BCL6 co-repressor                                                                      | Hs.659681 |
| 224589_at    | 3hISvsC_down_FemaleSpecific | XIST                 | NA    | -1.48 | Xq13.2               | X (inactive)-specific transcript (non-protein coding)                                  | ---       |
| 225028_at    | 3hISvsC_down_FemaleSpecific | LOC550643            | NA    | -1.50 | Xp11.1               | hypothetical LOC550643                                                                 | Hs.355559 |
| 225382_at    | 3hISvsC_down_FemaleSpecific | ZNF275               | NA    | -1.23 | Xq28                 | zinc finger protein 275                                                                | Hs.348963 |
| 225383_at    | 3hISvsC_down_FemaleSpecific | ZNF275               | NA    | -1.43 | Xq28                 | zinc finger protein 275                                                                | Hs.348963 |
| 228005_at    | 3hISvsC_down_FemaleSpecific | ZXDB                 | NA    | -1.44 | Xp11.21              | zinc finger, X-linked, duplicated B                                                    | Hs.156257 |
| 229234_at    | 3hISvsC_down_FemaleSpecific | ZC3H12B              | NA    | -1.46 | Xq12                 | zinc finger CCCH-type containing 12B                                                   | Hs.21249  |
| 229286_at    | 3hISvsC_down_FemaleSpecific | MAGEE1               | NA    | -1.55 | Xq13.3               | melanoma antigen family E, 1                                                           | Hs.8453   |
| 229365_at    | 3hISvsC_down_FemaleSpecific | PPP1R3F              | NA    | -1.34 | Xp11.23              | similar to protein phosphatase 1, regulatory (inhibitor) subunit 3F /// protein phosph | Hs.433652 |
| 230224_at    | 3hISvsC_down_FemaleSpecific | ZCCHC18              | NA    | -1.54 | Xq22.2               | zinc finger, CCHC domain containing 18                                                 | Hs.648338 |
| 235433_at    | 3hISvsC_down_FemaleSpecific | APOOL                | NA    | -1.53 | Xq21.1               | apolipoprotein O-like                                                                  | Hs.512181 |
| 235520_at    | 3hISvsC_down_FemaleSpecific | ZNF280C              | NA    | -1.51 | Xq26.1               | zinc finger protein 280C                                                               | Hs.308418 |
| 236294_at    | 3hISvsC_down_FemaleSpecific | HUWE1                | NA    | -1.29 | Xp11.22              | HECT, UBA and WWE domain containing 1                                                  | Hs.136905 |
| 239034_at    | 3hISvsC_down_FemaleSpecific | CXorf24              | NA    | -1.33 | Xp11.23              | chromosome X open reading frame 24                                                     | Hs.597617 |
| 243764_at    | 3hISvsC_down_FemaleSpecific | VSIG1                | NA    | -1.62 | Xq22.3               | V-set and immunoglobulin domain containing 1                                           | Hs.177164 |
| 32042_at     | 3hISvsC_down_FemaleSpecific | ENOX2                | NA    | -1.24 | Xq25-q26.2           | ecto-NOX disulfide-thiol exchanger 2                                                   | Hs.171458 |
| 204459_at    | 3hISvsC_down_Common         | CSTF2                | -1.25 | -1.26 | Xq22.1               | cleavage stimulation factor, 3' pre-RNA, subunit 2, 64kDa                              | Hs.132370 |
| 207681_at    | 3hISvsC_down_Common         | CXCR3                | -1.45 | -1.42 | Xq13                 | chemokine (C-X-C motif) receptor 3                                                     | Hs.198252 |
| 208723_at    | 3hISvsC_down_Common         | USP11                | -1.29 | -1.30 | Xp11.23              | ubiquitin specific peptidase 11                                                        | Hs.171501 |
| 209014_at    | 3hISvsC_down_Common         | MAGED1               | -1.31 | -1.28 | Xp11.23              | melanoma antigen family D, 1                                                           | Hs.5258   |
| 219433_at    | 3hISvsC_down_Common         | BCOR                 | -1.28 | -1.46 | Xp21.2-p11.4         | BCL6 co-repressor                                                                      | Hs.659681 |

# SUPPLEMENTAL MATERIAL

**Supplementary Table 1. Genes differential expressed between 3h ischemic stroke (3hIS) and non-stroke controls ( C) ( $\alpha \leq 0.05$ , fold change  $\geq |1.2|$ )**

| Probeset ID  | DE list                   | Gene Symbol         | Fold Change                  |                                  | Cytoband          | Gene Title                                                                 | UniGene ID |
|--------------|---------------------------|---------------------|------------------------------|----------------------------------|-------------------|----------------------------------------------------------------------------|------------|
|              |                           |                     | IS * Male vs. Control * Male | IS * Female vs. Control * Female |                   |                                                                            |            |
| 1553007_a_at | 3hISvsC_up_MaleSpecific   | ODZ1                | 1.38                         | NA                               | Xq25              | odz, odd Oz/ten-m homolog 1(Drosophila)                                    | Hs.23796   |
| 1554206_at   | 3hISvsC_up_MaleSpecific   | TMLHE               | 1.39                         | NA                               | Xq28              | trimethyllysine hydroxylase, epsilor                                       | Hs.133321  |
| 1559510_at   | 3hISvsC_up_MaleSpecific   | BHLHB9              | 1.51                         | NA                               | Xq23              | Basic helix-loop-helix domain containing, class B, 9                       | Hs.4276    |
| 201472_at    | 3hISvsC_up_MaleSpecific   | VBP1                | 1.35                         | NA                               | Xq28              | von Hippel-Lindau binding protein 1                                        | Hs.436803  |
| 202105_at    | 3hISvsC_up_MaleSpecific   | IGBP1               | 1.23                         | NA                               | Xq13.1-q13.3      | immunoglobulin (CD79A) binding protein 1                                   | Hs.496267  |
| 206696_at    | 3hISvsC_up_MaleSpecific   | GPR143              | 1.33                         | NA                               | Xp22.3            | G protein-coupled receptor 143                                             | Hs.74124   |
| 209022_at    | 3hISvsC_up_MaleSpecific   | STAG2               | 1.31                         | NA                               | Xq25              | stromal antigen 2                                                          | Hs.496710  |
| 214009_at    | 3hISvsC_up_MaleSpecific   | MSL3L1              | 1.40                         | NA                               | Xp22.3            | male-specific lethal 3 homolog (Drosophila)                                | Hs.655288  |
| 214681_at    | 3hISvsC_up_MaleSpecific   | GK                  | 1.51                         | NA                               | Xp21.3            | glycerol kinase                                                            | Hs.1466    |
| 219771_at    | 3hISvsC_up_MaleSpecific   | TBC1D8B             | 1.56                         | NA                               | Xq22.3            | TBC1 domain family, member 8B (with GRAM domain)                           | Hs.351798  |
| 226335_at    | 3hISvsC_up_MaleSpecific   | RPS6KA3             | 1.28                         | NA                               | Xp22.2-p22.1      | ribosomal protein S6 kinase, 90kDa, polypeptide 3                          | Hs.445387  |
| 228968_at    | 3hISvsC_up_MaleSpecific   | ZNF449              | 1.31                         | NA                               | Xq26.3            | zinc finger protein 449                                                    | Hs.28780   |
| 230866_at    | 3hISvsC_up_MaleSpecific   | CYSLTR1             | 1.39                         | NA                               | Xq13.2-q21.1      | cysteinyl leukotriene receptor 1                                           | Hs.201300  |
| 231747_at    | 3hISvsC_up_MaleSpecific   | CYSLTR1             | 1.23                         | NA                               | Xq13.2-q21.1      | cysteinyl leukotriene receptor 1                                           | Hs.201300  |
| 232087_at    | 3hISvsC_up_MaleSpecific   | CXorf23             | 1.61                         | NA                               | Xp22.12           | chromosome X open reading frame 23                                         | Hs.28896   |
| 232157_at    | 3hISvsC_up_MaleSpecific   | SPRY3               | 1.45                         | NA                               | Xq28 and Yq12     | sprouty homolog 3 (Drosophila)                                             | Hs.381912  |
| 236165_at    | 3hISvsC_up_MaleSpecific   | MSL3L1              | 1.48                         | NA                               | ---               | ---                                                                        | ---        |
| 238053_at    | 3hISvsC_up_MaleSpecific   | DHRX                | 1.44                         | NA                               | Xp22.33; Yp11.2   | dehydrogenase/reductase (SDR family) X-linkec                              | Hs.131452  |
| 238989_at    | 3hISvsC_up_MaleSpecific   | C1GALT1C1           | 1.44                         | NA                               | Xq24              | C1GALT1-specific chaperone 1                                               | Hs.643920  |
| 242931_at    | 3hISvsC_up_MaleSpecific   | LONRF3              | 1.38                         | NA                               | Xq24              | LON peptidase N-terminal domain and ring finger 3                          | Hs.144266  |
| 243683_at    | 3hISvsC_up_MaleSpecific   | MORF4L2             | 1.71                         | NA                               | Xq22              | Mortality factor 4 like 2                                                  | Hs.326387  |
| 244470_at    | 3hISvsC_up_MaleSpecific   | RNF12               | 1.27                         | NA                               | Xq13-q21          | Ring finger protein, LIM domain interacting                                | Hs.653288  |
| 1552927_at   | 3hISvsC_up_FemaleSpecific | MAP3K7IP3           | NA                           | 1.48                             | Xp21.2            | TGF-beta activated kinase 1/MAP3K7 binding protein 3                       | Hs.188256  |
| 1557726_at   | 3hISvsC_up_FemaleSpecific | ARMCX4              | NA                           | 1.21                             | Xq22.1            | armadillo repeat containing, X-linked 4                                    | Hs.9728    |
| 1557880_at   | 3hISvsC_up_FemaleSpecific | PCDH11X /// PCDH11Y | NA                           | 1.33                             | Xq21.3 /// Yp11.2 | protocadherin 11 X-linked /// protocadherin 11 Y-linkec                    | Hs.661308  |
| 1562805_at   | 3hISvsC_up_FemaleSpecific | LOC349408           | NA                           | 1.43                             | Xp22.31           | hypothetical LOC349408                                                     | Hs.685035  |
| 1565446_at   | 3hISvsC_up_FemaleSpecific | HPRT1               | NA                           | 1.22                             | Xq26.1            | Hypoxanthine phosphoribosyltransferase 1                                   | Hs.412707  |
| 201210_at    | 3hISvsC_up_FemaleSpecific | DDX3X               | NA                           | 1.20                             | Xp11.3-p11.23     | DEAD (Asp-Glu-Ala-Asp) box polypeptide 3, X-linkec                         | Hs.380774  |
| 201666_at    | 3hISvsC_up_FemaleSpecific | TIMP1               | NA                           | 1.29                             | Xp11.3-p11.23     | TIMP metalloproteinase inhibitor 1                                         | Hs.522632  |
| 205645_at    | 3hISvsC_up_FemaleSpecific | REPS2               | NA                           | 1.55                             | Xp22.2-p22.13     | RALBP1 associated Eps domain containing 2                                  | Hs.186810  |
| 206002_at    | 3hISvsC_up_FemaleSpecific | GPR64               | NA                           | 1.31                             | Xp22.13           | G protein-coupled receptor 64                                              | Hs.146978  |
| 210274_at    | 3hISvsC_up_FemaleSpecific | MAGEA8              | NA                           | 1.22                             | Xq28              | melanoma antigen family A, 8                                               | Hs.522803  |
| 212340_at    | 3hISvsC_up_FemaleSpecific | YIPF6               | NA                           | 1.45                             | Xq12              | Yip1 domain family, member 6                                               | Hs.82719   |
| 212457_at    | 3hISvsC_up_FemaleSpecific | TFE3                | NA                           | 1.22                             | Xp11.22           | transcription factor binding to IGHM enhancer 3                            | Hs.274184  |
| 212741_at    | 3hISvsC_up_FemaleSpecific | MAOA                | NA                           | 2.67                             | Xp11.3            | monoamine oxidase A                                                        | Hs.183109  |
| 216722_at    | 3hISvsC_up_FemaleSpecific | VENTXP1             | NA                           | 1.21                             | Xp21.3            | VENT homeobox (Xenopus laevis) pseudogene 1                                | Hs.447377  |
| 230030_at    | 3hISvsC_up_FemaleSpecific | HS6ST2              | NA                           | 1.28                             | Xq26.2            | heparan sulfate 6-O-sulfotransferase 2                                     | Hs.385956  |
| 244825_at    | 3hISvsC_up_FemaleSpecific | SHROOM4             | NA                           | 1.59                             | Xp11.22           | shroom family member 4                                                     | Hs.420541  |
| 200737_at    | 3hISvsC_up_Common         | PGK1                | 1.28                         | 1.34                             | Xq13              | phosphoglycerate kinase 1                                                  | Hs.78771   |
| 200821_at    | 3hISvsC_up_Common         | LAMP2               | 1.33                         | 1.37                             | Xq24              | lysosomal-associated membrane protein 2                                    | Hs.496684  |
| 201099_at    | 3hISvsC_up_Common         | USP9X               | 1.34                         | 1.29                             | Xp11.4            | ubiquitin specific peptidase 9, X-linkec                                   | Hs.77578   |
| 201132_at    | 3hISvsC_up_Common         | HNRNPH2             | 1.34                         | 1.41                             | Xq22              | heterogeneous nuclear ribonucleoprotein H2 (H <sup>2</sup> )               | Hs.632828  |
| 201136_at    | 3hISvsC_up_Common         | PLP2                | 1.32                         | 1.34                             | Xp11.23           | proteolipid protein 2 (colonic epithelium-enriched)                        | Hs.77422   |
| 201406_at    | 3hISvsC_up_Common         | RPL36A              | 1.74                         | 1.69                             | Xq22.1            | ribosomal protein L36a                                                     | Hs.432485  |
| 202110_at    | 3hISvsC_up_Common         | COX7B               | 1.79                         | 1.81                             | Xq21.1            | cytochrome c oxidase subunit VIIb                                          | Hs.522699  |
| 202298_at    | 3hISvsC_up_Common         | NDUFA1              | 1.42                         | 1.31                             | Xq24              | NADH dehydrogenase (ubiquinone) 1 alpha subcomplex, 1, 7.5kDa              | Hs.534168  |
| 203042_at    | 3hISvsC_up_Common         | LAMP2               | 1.30                         | 1.39                             | Xq24              | lysosomal-associated membrane protein 2                                    | Hs.496684  |
| 206464_at    | 3hISvsC_up_Common         | BMX                 | 2.42                         | 3.40                             | Xp22.2            | BMX non-receptor tyrosine kinase                                           | Hs.495731  |
| 217383_at    | 3hISvsC_up_Common         | PGK1                | 1.28                         | 1.34                             | Xq13              | Phosphoglycerate kinase 1                                                  | Hs.78771   |
| 218163_at    | 3hISvsC_up_Common         | MCTS1               | 1.33                         | 1.27                             | Xq22-q24          | malignant T cell amplified sequence 1                                      | Hs.102696  |
| 219283_at    | 3hISvsC_up_Common         | C1GALT1C1           | 1.44                         | 1.38                             | Xq24              | C1GALT1-specific chaperone 1                                               | Hs.643920  |
| 220832_at    | 3hISvsC_up_Common         | TLR8                | 1.32                         | 1.34                             | Xp22              | toll-like receptor 8                                                       | Hs.660543  |
| 221895_at    | 3hISvsC_up_Common         | MOSPD2              | 1.32                         | 1.31                             | Xp22.2            | motile sperm domain containing 2                                           | Hs.190043  |
| 222815_at    | 3hISvsC_up_Common         | RNF12               | 1.31                         | 1.33                             | Xq13-q21          | ring finger protein, LIM domain interacting                                | Hs.653288  |
| 223439_at    | 3hISvsC_up_Common         | NKAP                | 1.27                         | 1.25                             | Xq24              | NFKB activating protein                                                    | Hs.522771  |
| 225154_at    | 3hISvsC_up_Common         | SYAP1               | 1.32                         | 1.39                             | Xp22.2            | synapse associated protein 1, SAP47 homolog (Drosophila)                   | Hs.489336  |
| 226671_at    | 3hISvsC_up_Common         | LAMP2               | 1.60                         | 1.57                             | Xq24              | lysosomal-associated membrane protein 2                                    | Hs.496684  |
| 226875_at    | 3hISvsC_up_Common         | DOCK11              | 1.26                         | 1.25                             | Xq24              | dedicator of cytokinesis 11                                                | Hs.368203  |
| 227357_at    | 3hISvsC_up_Common         | MAP3K7IP3           | 1.43                         | 1.34                             | Xp21.2            | TGF-beta activated kinase 1/MAP3K7 binding protein 3                       | Hs.188256  |
| 227425_at    | 3hISvsC_up_Common         | REPS2               | 1.73                         | 1.77                             | Xp22.2-p22.13     | RALBP1 associated Eps domain containing 2                                  | Hs.186810  |
| 229560_at    | 3hISvsC_up_Common         | TLR8                | 1.30                         | 1.47                             | Xp22              | toll-like receptor 8                                                       | Hs.660543  |
| 230532_at    | 3hISvsC_up_Common         | CXorf38             | 1.41                         | 1.27                             | Xp11.4            | chromosome X open reading frame 38                                         | Hs.495961  |
| 233082_at    | 3hISvsC_up_Common         | ZNF182 /// ZNF630   | 1.95                         | 1.80                             | Xp11.3-p11.1      | zinc finger protein 630                                                    | Hs.650883  |
| 243201_at    | 3hISvsC_up_Common         | HNRNPH2             | 1.48                         | 1.33                             | Xq22              | Heterogeneous nuclear ribonucleoprotein H2 (H <sup>2</sup> )               | Hs.632828  |
| 64883_at     | 3hISvsC_up_Common         | MOSPD2              | 1.46                         | 1.40                             | Xp22.2            | motile sperm domain containing 2                                           | Hs.190043  |
| 1555590_a_at | 3hISvsC_down_MaleSpecific | GATA1               | -1.70                        | NA                               | Xp11.23           | GATA binding protein 1 (globin transcription factor 1)                     | Hs.765     |
| 202219_at    | 3hISvsC_down_MaleSpecific | SLC6A8              | -1.82                        | NA                               | Xq28              | solute carrier family 6 (neurotransmitter transporter, creatine), member 8 | Hs.540696  |
| 202711_at    | 3hISvsC_down_MaleSpecific | EFNB1               | -1.25                        | NA                               | Xq12              | ephrin-B1                                                                  | Hs.144700  |
| 206868_at    | 3hISvsC_down_MaleSpecific | STARDB8             | -1.20                        | NA                               | Xq13.1            | STAR-related lipid transfer (START) domain containing 8                    | Hs.95140   |
| 210446_at    | 3hISvsC_down_MaleSpecific | GATA1               | -1.52                        | NA                               | Xp11.23           | GATA binding protein 1 (globin transcription factor 1)                     | Hs.765     |
| 219814_at    | 3hISvsC_down_MaleSpecific | MBNL3               | -1.54                        | NA                               | Xq26.2            | muscleblind-like 3 (Drosophila)                                            | Hs.105134  |

|              |                             |                      |       |       |                      |                                                                                        |           |
|--------------|-----------------------------|----------------------|-------|-------|----------------------|----------------------------------------------------------------------------------------|-----------|
| 1552671_a_at | 3hISvsC_down_FemaleSpecific | SLC9A7               | NA    | -1.27 | Xp11.3-p11.23 Xp11.3 | solute carrier family 9 (sodium/hydrogen exchanger), member 7                          | Hs.496057 |
| 1552882_a_at | 3hISvsC_down_FemaleSpecific | FAM123B              | NA    | -1.50 | Xq11.2               | family with sequence similarity 123E                                                   | Hs.314225 |
| 1553998_at   | 3hISvsC_down_FemaleSpecific | DMRTC1 /// LOC728656 | NA    | -1.75 | Xq13.2               | DMRT-like family C1 /// DMRT-like family C1E                                           | Hs.712728 |
| 1555882_at   | 3hISvsC_down_FemaleSpecific | SPIN3                | NA    | -1.40 | Xp11.21              | spindlin family, member 3                                                              | Hs.522672 |
| 1561660_at   | 3hISvsC_down_FemaleSpecific | MCART6               | NA    | -1.96 | Xq22.2               | mitochondrial carrier triple repeat 6                                                  | Hs.660022 |
| 201540_at    | 3hISvsC_down_FemaleSpecific | FHL1                 | NA    | -1.35 | Xq26                 | four and a half LIM domains 1                                                          | Hs.435369 |
| 209167_at    | 3hISvsC_down_FemaleSpecific | GPM6B                | NA    | -1.68 | Xp22.2               | glycoprotein M6B                                                                       | Hs.495710 |
| 213289_at    | 3hISvsC_down_FemaleSpecific | APOOL                | NA    | -1.58 | Xq21.1               | Apolipoprotein O-like                                                                  | Hs.512181 |
| 214607_at    | 3hISvsC_down_FemaleSpecific | PAK3                 | NA    | -1.64 | Xq23                 | p21 protein (Cdc42/Rac)-activated kinase 3                                             | Hs.656789 |
| 218012_at    | 3hISvsC_down_FemaleSpecific | TSPYL2               | NA    | -1.29 | Xp11.2               | TSPY-like 2                                                                            | Hs.136164 |
| 223915_at    | 3hISvsC_down_FemaleSpecific | BCOR                 | NA    | -1.37 | Xp21.2-p11.4         | BCL6 co-repressor                                                                      | Hs.659681 |
| 224589_at    | 3hISvsC_down_FemaleSpecific | XIST                 | NA    | -1.48 | Xq13.2               | X (inactive)-specific transcript (non-protein coding)                                  | ---       |
| 225028_at    | 3hISvsC_down_FemaleSpecific | LOC550643            | NA    | -1.50 | Xp11.1               | hypothetical LOC550643                                                                 | Hs.355559 |
| 225382_at    | 3hISvsC_down_FemaleSpecific | ZNF275               | NA    | -1.23 | Xq28                 | zinc finger protein 275                                                                | Hs.348963 |
| 225383_at    | 3hISvsC_down_FemaleSpecific | ZNF275               | NA    | -1.43 | Xq28                 | zinc finger protein 275                                                                | Hs.348963 |
| 228005_at    | 3hISvsC_down_FemaleSpecific | ZXDB                 | NA    | -1.44 | Xp11.21              | zinc finger, X-linked, duplicated B                                                    | Hs.156257 |
| 229234_at    | 3hISvsC_down_FemaleSpecific | ZC3H12B              | NA    | -1.46 | Xq12                 | zinc finger CCCH-type containing 12B                                                   | Hs.21249  |
| 229286_at    | 3hISvsC_down_FemaleSpecific | MAGEE1               | NA    | -1.55 | Xq13.3               | melanoma antigen family E, 1                                                           | Hs.8453   |
| 229365_at    | 3hISvsC_down_FemaleSpecific | PPP1R3F              | NA    | -1.34 | Xp11.23              | similar to protein phosphatase 1, regulatory (inhibitor) subunit 3F /// protein phosph | Hs.433652 |
| 230224_at    | 3hISvsC_down_FemaleSpecific | ZCCHC18              | NA    | -1.54 | Xq22.2               | zinc finger, CCHC domain containing 18                                                 | Hs.648338 |
| 235433_at    | 3hISvsC_down_FemaleSpecific | APOOL                | NA    | -1.53 | Xq21.1               | apolipoprotein O-like                                                                  | Hs.512181 |
| 235520_at    | 3hISvsC_down_FemaleSpecific | ZNF280C              | NA    | -1.51 | Xq26.1               | zinc finger protein 280C                                                               | Hs.308418 |
| 236294_at    | 3hISvsC_down_FemaleSpecific | HUWE1                | NA    | -1.29 | Xp11.22              | HECT, UBA and WWE domain containing 1                                                  | Hs.136905 |
| 239034_at    | 3hISvsC_down_FemaleSpecific | CXorf24              | NA    | -1.33 | Xp11.23              | chromosome X open reading frame 24                                                     | Hs.597617 |
| 243764_at    | 3hISvsC_down_FemaleSpecific | VSIG1                | NA    | -1.62 | Xq22.3               | V-set and immunoglobulin domain containing 1                                           | Hs.177164 |
| 32042_at     | 3hISvsC_down_FemaleSpecific | ENOX2                | NA    | -1.24 | Xq25-q26.2           | ecto-NOX disulfide-thiol exchanger 2                                                   | Hs.171458 |
| 204459_at    | 3hISvsC_down_Common         | CSTF2                | -1.25 | -1.26 | Xq22.1               | cleavage stimulation factor, 3' pre-RNA, subunit 2, 64kDa                              | Hs.132370 |
| 207681_at    | 3hISvsC_down_Common         | CXCR3                | -1.45 | -1.42 | Xq13                 | chemokine (C-X-C motif) receptor 3                                                     | Hs.198252 |
| 208723_at    | 3hISvsC_down_Common         | USP11                | -1.29 | -1.30 | Xp11.23              | ubiquitin specific peptidase 11                                                        | Hs.171501 |
| 209014_at    | 3hISvsC_down_Common         | MAGED1               | -1.31 | -1.28 | Xp11.23              | melanoma antigen family D, 1                                                           | Hs.5258   |
| 219433_at    | 3hISvsC_down_Common         | BCOR                 | -1.28 | -1.46 | Xp21.2-p11.4         | BCL6 co-repressor                                                                      | Hs.659681 |

# SUPPLEMENTAL MATERIAL

**Supplementary Table 1. Genes differential expressed between 3h ischemic stroke (3hIS) and non-stroke controls ( C) ( $\alpha \leq 0.05$ , fold change  $\geq |1.2|$ )**

| Probeset ID  | DE list                   | Gene Symbol         | Fold Change                  |                                  | Cytoband          | Gene Title                                                                 | UniGene ID |
|--------------|---------------------------|---------------------|------------------------------|----------------------------------|-------------------|----------------------------------------------------------------------------|------------|
|              |                           |                     | IS * Male vs. Control * Male | IS * Female vs. Control * Female |                   |                                                                            |            |
| 1553007_a_at | 3hISvsC_up_MaleSpecific   | ODZ1                | 1.38                         | NA                               | Xq25              | odz, odd Oz/ten-m homolog 1(Drosophila)                                    | Hs.23796   |
| 1554206_at   | 3hISvsC_up_MaleSpecific   | TMLHE               | 1.39                         | NA                               | Xq28              | trimethyllysine hydroxylase, epsilor                                       | Hs.133321  |
| 1559510_at   | 3hISvsC_up_MaleSpecific   | BHLHB9              | 1.51                         | NA                               | Xq23              | Basic helix-loop-helix domain containing, class B, 9                       | Hs.4276    |
| 201472_at    | 3hISvsC_up_MaleSpecific   | VBP1                | 1.35                         | NA                               | Xq28              | von Hippel-Lindau binding protein 1                                        | Hs.436803  |
| 202105_at    | 3hISvsC_up_MaleSpecific   | IGBP1               | 1.23                         | NA                               | Xq13.1-q13.3      | immunoglobulin (CD79A) binding protein 1                                   | Hs.496267  |
| 206696_at    | 3hISvsC_up_MaleSpecific   | GPR143              | 1.33                         | NA                               | Xp22.3            | G protein-coupled receptor 143                                             | Hs.74124   |
| 209022_at    | 3hISvsC_up_MaleSpecific   | STAG2               | 1.31                         | NA                               | Xq25              | stromal antigen 2                                                          | Hs.496710  |
| 214009_at    | 3hISvsC_up_MaleSpecific   | MSL3L1              | 1.40                         | NA                               | Xp22.3            | male-specific lethal 3 homolog (Drosophila)                                | Hs.655288  |
| 214681_at    | 3hISvsC_up_MaleSpecific   | GK                  | 1.51                         | NA                               | Xp21.3            | glycerol kinase                                                            | Hs.1466    |
| 219771_at    | 3hISvsC_up_MaleSpecific   | TBC1D8B             | 1.56                         | NA                               | Xq22.3            | TBC1 domain family, member 8B (with GRAM domain)                           | Hs.351798  |
| 226335_at    | 3hISvsC_up_MaleSpecific   | RPS6KA3             | 1.28                         | NA                               | Xp22.2-p22.1      | ribosomal protein S6 kinase, 90kDa, polypeptide 3                          | Hs.445387  |
| 228968_at    | 3hISvsC_up_MaleSpecific   | ZNF449              | 1.31                         | NA                               | Xq26.3            | zinc finger protein 449                                                    | Hs.28780   |
| 230866_at    | 3hISvsC_up_MaleSpecific   | CYSLTR1             | 1.39                         | NA                               | Xq13.2-q21.1      | cysteinyl leukotriene receptor 1                                           | Hs.201300  |
| 231747_at    | 3hISvsC_up_MaleSpecific   | CYSLTR1             | 1.23                         | NA                               | Xq13.2-q21.1      | cysteinyl leukotriene receptor 1                                           | Hs.201300  |
| 232087_at    | 3hISvsC_up_MaleSpecific   | CXorf23             | 1.61                         | NA                               | Xp22.12           | chromosome X open reading frame 23                                         | Hs.28896   |
| 232157_at    | 3hISvsC_up_MaleSpecific   | SPRY3               | 1.45                         | NA                               | Xq28 and Yq12     | sprouty homolog 3 (Drosophila)                                             | Hs.381912  |
| 236165_at    | 3hISvsC_up_MaleSpecific   | MSL3L1              | 1.48                         | NA                               | ---               | ---                                                                        | ---        |
| 238053_at    | 3hISvsC_up_MaleSpecific   | DHRX                | 1.44                         | NA                               | Xp22.33; Yp11.2   | dehydrogenase/reductase (SDR family) X-linkec                              | Hs.131452  |
| 238989_at    | 3hISvsC_up_MaleSpecific   | C1GALT1C1           | 1.44                         | NA                               | Xq24              | C1GALT1-specific chaperone 1                                               | Hs.643920  |
| 242931_at    | 3hISvsC_up_MaleSpecific   | LONRF3              | 1.38                         | NA                               | Xq24              | LON peptidase N-terminal domain and ring finger 3                          | Hs.144266  |
| 243683_at    | 3hISvsC_up_MaleSpecific   | MORF4L2             | 1.71                         | NA                               | Xq22              | Mortality factor 4 like 2                                                  | Hs.326387  |
| 244470_at    | 3hISvsC_up_MaleSpecific   | RNF12               | 1.27                         | NA                               | Xq13-q21          | Ring finger protein, LIM domain interacting                                | Hs.653288  |
| 1552927_at   | 3hISvsC_up_FemaleSpecific | MAP3K7IP3           | NA                           | 1.48                             | Xp21.2            | TGF-beta activated kinase 1/MAP3K7 binding protein 3                       | Hs.188256  |
| 1557726_at   | 3hISvsC_up_FemaleSpecific | ARMCX4              | NA                           | 1.21                             | Xq22.1            | armadillo repeat containing, X-linked 4                                    | Hs.9728    |
| 1557880_at   | 3hISvsC_up_FemaleSpecific | PCDH11X /// PCDH11Y | NA                           | 1.33                             | Xq21.3 /// Yp11.2 | protocadherin 11 X-linked /// protocadherin 11 Y-linkec                    | Hs.661308  |
| 1562805_at   | 3hISvsC_up_FemaleSpecific | LOC349408           | NA                           | 1.43                             | Xp22.31           | hypothetical LOC349408                                                     | Hs.685035  |
| 1565446_at   | 3hISvsC_up_FemaleSpecific | HPRT1               | NA                           | 1.22                             | Xq26.1            | Hypoxanthine phosphoribosyltransferase 1                                   | Hs.412707  |
| 201210_at    | 3hISvsC_up_FemaleSpecific | DDX3X               | NA                           | 1.20                             | Xp11.3-p11.23     | DEAD (Asp-Glu-Ala-Asp) box polypeptide 3, X-linkec                         | Hs.380774  |
| 201666_at    | 3hISvsC_up_FemaleSpecific | TIMP1               | NA                           | 1.29                             | Xp11.3-p11.23     | TIMP metalloproteinase inhibitor 1                                         | Hs.522632  |
| 205645_at    | 3hISvsC_up_FemaleSpecific | REPS2               | NA                           | 1.55                             | Xp22.2-p22.13     | RALBP1 associated Eps domain containing 2                                  | Hs.186810  |
| 206002_at    | 3hISvsC_up_FemaleSpecific | GPR64               | NA                           | 1.31                             | Xp22.13           | G protein-coupled receptor 64                                              | Hs.146978  |
| 210274_at    | 3hISvsC_up_FemaleSpecific | MAGEA8              | NA                           | 1.22                             | Xq28              | melanoma antigen family A, 8                                               | Hs.522803  |
| 212340_at    | 3hISvsC_up_FemaleSpecific | YIPF6               | NA                           | 1.45                             | Xq12              | Yip1 domain family, member 6                                               | Hs.82719   |
| 212457_at    | 3hISvsC_up_FemaleSpecific | TFE3                | NA                           | 1.22                             | Xp11.22           | transcription factor binding to IGHM enhancer 3                            | Hs.274184  |
| 212741_at    | 3hISvsC_up_FemaleSpecific | MAOA                | NA                           | 2.67                             | Xp11.3            | monoamine oxidase A                                                        | Hs.183109  |
| 216722_at    | 3hISvsC_up_FemaleSpecific | VENTXP1             | NA                           | 1.21                             | Xp21.3            | VENT homeobox (Xenopus laevis) pseudogene 1                                | Hs.447377  |
| 230030_at    | 3hISvsC_up_FemaleSpecific | HS6ST2              | NA                           | 1.28                             | Xq26.2            | heparan sulfate 6-O-sulfotransferase 2                                     | Hs.385956  |
| 244825_at    | 3hISvsC_up_FemaleSpecific | SHROOM4             | NA                           | 1.59                             | Xp11.22           | shroom family member 4                                                     | Hs.420541  |
| 200737_at    | 3hISvsC_up_Common         | PGK1                | 1.28                         | 1.34                             | Xq13              | phosphoglycerate kinase 1                                                  | Hs.78771   |
| 200821_at    | 3hISvsC_up_Common         | LAMP2               | 1.33                         | 1.37                             | Xq24              | lysosomal-associated membrane protein 2                                    | Hs.496684  |
| 201099_at    | 3hISvsC_up_Common         | USP9X               | 1.34                         | 1.29                             | Xp11.4            | ubiquitin specific peptidase 9, X-linkec                                   | Hs.77578   |
| 201132_at    | 3hISvsC_up_Common         | HNRNPH2             | 1.34                         | 1.41                             | Xq22              | heterogeneous nuclear ribonucleoprotein H2 (H <sup>2</sup> )               | Hs.632828  |
| 201136_at    | 3hISvsC_up_Common         | PLP2                | 1.32                         | 1.34                             | Xp11.23           | proteolipid protein 2 (colonic epithelium-enriched)                        | Hs.77422   |
| 201406_at    | 3hISvsC_up_Common         | RPL36A              | 1.74                         | 1.69                             | Xq22.1            | ribosomal protein L36a                                                     | Hs.432485  |
| 202110_at    | 3hISvsC_up_Common         | COX7B               | 1.79                         | 1.81                             | Xq21.1            | cytochrome c oxidase subunit VIIb                                          | Hs.522699  |
| 202298_at    | 3hISvsC_up_Common         | NDUFA1              | 1.42                         | 1.31                             | Xq24              | NADH dehydrogenase (ubiquinone) 1 alpha subcomplex, 1, 7.5kDa              | Hs.534168  |
| 203042_at    | 3hISvsC_up_Common         | LAMP2               | 1.30                         | 1.39                             | Xq24              | lysosomal-associated membrane protein 2                                    | Hs.496684  |
| 206464_at    | 3hISvsC_up_Common         | BMX                 | 2.42                         | 3.40                             | Xp22.2            | BMX non-receptor tyrosine kinase                                           | Hs.495731  |
| 217383_at    | 3hISvsC_up_Common         | PGK1                | 1.28                         | 1.34                             | Xq13              | Phosphoglycerate kinase 1                                                  | Hs.78771   |
| 218163_at    | 3hISvsC_up_Common         | MCTS1               | 1.33                         | 1.27                             | Xq22-q24          | malignant T cell amplified sequence 1                                      | Hs.102696  |
| 219283_at    | 3hISvsC_up_Common         | C1GALT1C1           | 1.44                         | 1.38                             | Xq24              | C1GALT1-specific chaperone 1                                               | Hs.643920  |
| 220832_at    | 3hISvsC_up_Common         | TLR8                | 1.32                         | 1.34                             | Xp22              | toll-like receptor 8                                                       | Hs.660543  |
| 221895_at    | 3hISvsC_up_Common         | MOSPD2              | 1.32                         | 1.31                             | Xp22.2            | motile sperm domain containing 2                                           | Hs.190043  |
| 222815_at    | 3hISvsC_up_Common         | RNF12               | 1.31                         | 1.33                             | Xq13-q21          | ring finger protein, LIM domain interacting                                | Hs.653288  |
| 223439_at    | 3hISvsC_up_Common         | NKAP                | 1.27                         | 1.25                             | Xq24              | NFKB activating protein                                                    | Hs.522771  |
| 225154_at    | 3hISvsC_up_Common         | SYAP1               | 1.32                         | 1.39                             | Xp22.2            | synapse associated protein 1, SAP47 homolog (Drosophila)                   | Hs.489336  |
| 226671_at    | 3hISvsC_up_Common         | LAMP2               | 1.60                         | 1.57                             | Xq24              | lysosomal-associated membrane protein 2                                    | Hs.496684  |
| 226875_at    | 3hISvsC_up_Common         | DOCK11              | 1.26                         | 1.25                             | Xq24              | dedicator of cytokinesis 11                                                | Hs.368203  |
| 227357_at    | 3hISvsC_up_Common         | MAP3K7IP3           | 1.43                         | 1.34                             | Xp21.2            | TGF-beta activated kinase 1/MAP3K7 binding protein 3                       | Hs.188256  |
| 227425_at    | 3hISvsC_up_Common         | REPS2               | 1.73                         | 1.77                             | Xp22.2-p22.13     | RALBP1 associated Eps domain containing 2                                  | Hs.186810  |
| 229560_at    | 3hISvsC_up_Common         | TLR8                | 1.30                         | 1.47                             | Xp22              | toll-like receptor 8                                                       | Hs.660543  |
| 230532_at    | 3hISvsC_up_Common         | CXorf38             | 1.41                         | 1.27                             | Xp11.4            | chromosome X open reading frame 38                                         | Hs.495961  |
| 233082_at    | 3hISvsC_up_Common         | ZNF182 /// ZNF630   | 1.95                         | 1.80                             | Xp11.3-p11.1      | zinc finger protein 630                                                    | Hs.650883  |
| 243201_at    | 3hISvsC_up_Common         | HNRNPH2             | 1.48                         | 1.33                             | Xq22              | Heterogeneous nuclear ribonucleoprotein H2 (H <sup>2</sup> )               | Hs.632828  |
| 64883_at     | 3hISvsC_up_Common         | MOSPD2              | 1.46                         | 1.40                             | Xp22.2            | motile sperm domain containing 2                                           | Hs.190043  |
| 1555590_a_at | 3hISvsC_down_MaleSpecific | GATA1               | -1.70                        | NA                               | Xp11.23           | GATA binding protein 1 (globin transcription factor 1)                     | Hs.765     |
| 202219_at    | 3hISvsC_down_MaleSpecific | SLC6A8              | -1.82                        | NA                               | Xq28              | solute carrier family 6 (neurotransmitter transporter, creatine), member 8 | Hs.540696  |
| 202711_at    | 3hISvsC_down_MaleSpecific | EFNB1               | -1.25                        | NA                               | Xq12              | ephrin-B1                                                                  | Hs.144700  |
| 206868_at    | 3hISvsC_down_MaleSpecific | STARDB8             | -1.20                        | NA                               | Xq13.1            | STAR-related lipid transfer (START) domain containing 8                    | Hs.95140   |
| 210446_at    | 3hISvsC_down_MaleSpecific | GATA1               | -1.52                        | NA                               | Xp11.23           | GATA binding protein 1 (globin transcription factor 1)                     | Hs.765     |
| 219814_at    | 3hISvsC_down_MaleSpecific | MBNL3               | -1.54                        | NA                               | Xq26.2            | muscleblind-like 3 (Drosophila)                                            | Hs.105134  |

|              |                             |                      |       |       |                      |                                                                                        |           |
|--------------|-----------------------------|----------------------|-------|-------|----------------------|----------------------------------------------------------------------------------------|-----------|
| 1552671_a_at | 3hISvsC_down_FemaleSpecific | SLC9A7               | NA    | -1.27 | Xp11.3-p11.23 Xp11.3 | solute carrier family 9 (sodium/hydrogen exchanger), member 7                          | Hs.496057 |
| 1552882_a_at | 3hISvsC_down_FemaleSpecific | FAM123B              | NA    | -1.50 | Xq11.2               | family with sequence similarity 123E                                                   | Hs.314225 |
| 1553998_at   | 3hISvsC_down_FemaleSpecific | DMRTC1 /// LOC728656 | NA    | -1.75 | Xq13.2               | DMRT-like family C1 /// DMRT-like family C1E                                           | Hs.712728 |
| 1555882_at   | 3hISvsC_down_FemaleSpecific | SPIN3                | NA    | -1.40 | Xp11.21              | spindlin family, member 3                                                              | Hs.522672 |
| 1561660_at   | 3hISvsC_down_FemaleSpecific | MCART6               | NA    | -1.96 | Xq22.2               | mitochondrial carrier triple repeat 6                                                  | Hs.660022 |
| 201540_at    | 3hISvsC_down_FemaleSpecific | FHL1                 | NA    | -1.35 | Xq26                 | four and a half LIM domains 1                                                          | Hs.435369 |
| 209167_at    | 3hISvsC_down_FemaleSpecific | GPM6B                | NA    | -1.68 | Xp22.2               | glycoprotein M6B                                                                       | Hs.495710 |
| 213289_at    | 3hISvsC_down_FemaleSpecific | APOOL                | NA    | -1.58 | Xq21.1               | Apolipoprotein O-like                                                                  | Hs.512181 |
| 214607_at    | 3hISvsC_down_FemaleSpecific | PAK3                 | NA    | -1.64 | Xq23                 | p21 protein (Cdc42/Rac)-activated kinase 3                                             | Hs.656789 |
| 218012_at    | 3hISvsC_down_FemaleSpecific | TSPYL2               | NA    | -1.29 | Xp11.2               | TSPY-like 2                                                                            | Hs.136164 |
| 223915_at    | 3hISvsC_down_FemaleSpecific | BCOR                 | NA    | -1.37 | Xp21.2-p11.4         | BCL6 co-repressor                                                                      | Hs.659681 |
| 224589_at    | 3hISvsC_down_FemaleSpecific | XIST                 | NA    | -1.48 | Xq13.2               | X (inactive)-specific transcript (non-protein coding)                                  | ---       |
| 225028_at    | 3hISvsC_down_FemaleSpecific | LOC550643            | NA    | -1.50 | Xp11.1               | hypothetical LOC550643                                                                 | Hs.355559 |
| 225382_at    | 3hISvsC_down_FemaleSpecific | ZNF275               | NA    | -1.23 | Xq28                 | zinc finger protein 275                                                                | Hs.348963 |
| 225383_at    | 3hISvsC_down_FemaleSpecific | ZNF275               | NA    | -1.43 | Xq28                 | zinc finger protein 275                                                                | Hs.348963 |
| 228005_at    | 3hISvsC_down_FemaleSpecific | ZXDB                 | NA    | -1.44 | Xp11.21              | zinc finger, X-linked, duplicated B                                                    | Hs.156257 |
| 229234_at    | 3hISvsC_down_FemaleSpecific | ZC3H12B              | NA    | -1.46 | Xq12                 | zinc finger CCCH-type containing 12B                                                   | Hs.21249  |
| 229286_at    | 3hISvsC_down_FemaleSpecific | MAGEE1               | NA    | -1.55 | Xq13.3               | melanoma antigen family E, 1                                                           | Hs.8453   |
| 229365_at    | 3hISvsC_down_FemaleSpecific | PPP1R3F              | NA    | -1.34 | Xp11.23              | similar to protein phosphatase 1, regulatory (inhibitor) subunit 3F /// protein phosph | Hs.433652 |
| 230224_at    | 3hISvsC_down_FemaleSpecific | ZCCHC18              | NA    | -1.54 | Xq22.2               | zinc finger, CCHC domain containing 18                                                 | Hs.648338 |
| 235433_at    | 3hISvsC_down_FemaleSpecific | APOOL                | NA    | -1.53 | Xq21.1               | apolipoprotein O-like                                                                  | Hs.512181 |
| 235520_at    | 3hISvsC_down_FemaleSpecific | ZNF280C              | NA    | -1.51 | Xq26.1               | zinc finger protein 280C                                                               | Hs.308418 |
| 236294_at    | 3hISvsC_down_FemaleSpecific | HUWE1                | NA    | -1.29 | Xp11.22              | HECT, UBA and WWE domain containing 1                                                  | Hs.136905 |
| 239034_at    | 3hISvsC_down_FemaleSpecific | CXorf24              | NA    | -1.33 | Xp11.23              | chromosome X open reading frame 24                                                     | Hs.597617 |
| 243764_at    | 3hISvsC_down_FemaleSpecific | VSIG1                | NA    | -1.62 | Xq22.3               | V-set and immunoglobulin domain containing 1                                           | Hs.177164 |
| 32042_at     | 3hISvsC_down_FemaleSpecific | ENOX2                | NA    | -1.24 | Xq25-q26.2           | ecto-NOX disulfide-thiol exchanger 2                                                   | Hs.171458 |
| 204459_at    | 3hISvsC_down_Common         | CSTF2                | -1.25 | -1.26 | Xq22.1               | cleavage stimulation factor, 3' pre-RNA, subunit 2, 64kDa                              | Hs.132370 |
| 207681_at    | 3hISvsC_down_Common         | CXCR3                | -1.45 | -1.42 | Xq13                 | chemokine (C-X-C motif) receptor 3                                                     | Hs.198252 |
| 208723_at    | 3hISvsC_down_Common         | USP11                | -1.29 | -1.30 | Xp11.23              | ubiquitin specific peptidase 11                                                        | Hs.171501 |
| 209014_at    | 3hISvsC_down_Common         | MAGED1               | -1.31 | -1.28 | Xp11.23              | melanoma antigen family D, 1                                                           | Hs.5258   |
| 219433_at    | 3hISvsC_down_Common         | BCOR                 | -1.28 | -1.46 | Xp21.2-p11.4         | BCL6 co-repressor                                                                      | Hs.659681 |

# SUPPLEMENTAL MATERIAL

**Supplementary Table 1. Genes differential expressed between 3h ischemic stroke (3hIS) and non-stroke controls ( C) ( $\alpha \leq 0.05$ , fold change  $\geq |1.2|$ )**

| Probeset ID  | DE list                   | Gene Symbol         | Fold Change                  |                                  | Cytoband          | Gene Title                                                                 | UniGene ID |
|--------------|---------------------------|---------------------|------------------------------|----------------------------------|-------------------|----------------------------------------------------------------------------|------------|
|              |                           |                     | IS * Male vs. Control * Male | IS * Female vs. Control * Female |                   |                                                                            |            |
| 1553007_a_at | 3hISvsC_up_MaleSpecific   | ODZ1                | 1.38                         | NA                               | Xq25              | odz, odd Oz/ten-m homolog 1(Drosophila)                                    | Hs.23796   |
| 1554206_at   | 3hISvsC_up_MaleSpecific   | TMLHE               | 1.39                         | NA                               | Xq28              | trimethyllysine hydroxylase, epsilor                                       | Hs.133321  |
| 1559510_at   | 3hISvsC_up_MaleSpecific   | BHLHB9              | 1.51                         | NA                               | Xq23              | Basic helix-loop-helix domain containing, class B, 9                       | Hs.4276    |
| 201472_at    | 3hISvsC_up_MaleSpecific   | VBP1                | 1.35                         | NA                               | Xq28              | von Hippel-Lindau binding protein 1                                        | Hs.436803  |
| 202105_at    | 3hISvsC_up_MaleSpecific   | IGBP1               | 1.23                         | NA                               | Xq13.1-q13.3      | immunoglobulin (CD79A) binding protein 1                                   | Hs.496267  |
| 206696_at    | 3hISvsC_up_MaleSpecific   | GPR143              | 1.33                         | NA                               | Xp22.3            | G protein-coupled receptor 143                                             | Hs.74124   |
| 209022_at    | 3hISvsC_up_MaleSpecific   | STAG2               | 1.31                         | NA                               | Xq25              | stromal antigen 2                                                          | Hs.496710  |
| 214009_at    | 3hISvsC_up_MaleSpecific   | MSL3L1              | 1.40                         | NA                               | Xp22.3            | male-specific lethal 3 homolog (Drosophila)                                | Hs.655288  |
| 214681_at    | 3hISvsC_up_MaleSpecific   | GK                  | 1.51                         | NA                               | Xp21.3            | glycerol kinase                                                            | Hs.1466    |
| 219771_at    | 3hISvsC_up_MaleSpecific   | TBC1D8B             | 1.56                         | NA                               | Xq22.3            | TBC1 domain family, member 8B (with GRAM domain)                           | Hs.351798  |
| 226335_at    | 3hISvsC_up_MaleSpecific   | RPS6KA3             | 1.28                         | NA                               | Xp22.2-p22.1      | ribosomal protein S6 kinase, 90kDa, polypeptide 3                          | Hs.445387  |
| 228968_at    | 3hISvsC_up_MaleSpecific   | ZNF449              | 1.31                         | NA                               | Xq26.3            | zinc finger protein 449                                                    | Hs.28780   |
| 230866_at    | 3hISvsC_up_MaleSpecific   | CYSLTR1             | 1.39                         | NA                               | Xq13.2-q21.1      | cysteinyl leukotriene receptor 1                                           | Hs.201300  |
| 231747_at    | 3hISvsC_up_MaleSpecific   | CYSLTR1             | 1.23                         | NA                               | Xq13.2-q21.1      | cysteinyl leukotriene receptor 1                                           | Hs.201300  |
| 232087_at    | 3hISvsC_up_MaleSpecific   | CXorf23             | 1.61                         | NA                               | Xp22.12           | chromosome X open reading frame 23                                         | Hs.28896   |
| 232157_at    | 3hISvsC_up_MaleSpecific   | SPRY3               | 1.45                         | NA                               | Xq28 and Yq12     | sprouty homolog 3 (Drosophila)                                             | Hs.381912  |
| 236165_at    | 3hISvsC_up_MaleSpecific   | MSL3L1              | 1.48                         | NA                               | ---               | ---                                                                        | ---        |
| 238053_at    | 3hISvsC_up_MaleSpecific   | DHRX                | 1.44                         | NA                               | Xp22.33; Yp11.2   | dehydrogenase/reductase (SDR family) X-linkec                              | Hs.131452  |
| 238989_at    | 3hISvsC_up_MaleSpecific   | C1GALT1C1           | 1.44                         | NA                               | Xq24              | C1GALT1-specific chaperone 1                                               | Hs.643920  |
| 242931_at    | 3hISvsC_up_MaleSpecific   | LONRF3              | 1.38                         | NA                               | Xq24              | LON peptidase N-terminal domain and ring finger 3                          | Hs.144266  |
| 243683_at    | 3hISvsC_up_MaleSpecific   | MORF4L2             | 1.71                         | NA                               | Xq22              | Mortality factor 4 like 2                                                  | Hs.326387  |
| 244470_at    | 3hISvsC_up_MaleSpecific   | RNF12               | 1.27                         | NA                               | Xq13-q21          | Ring finger protein, LIM domain interacting                                | Hs.653288  |
| 1552927_at   | 3hISvsC_up_FemaleSpecific | MAP3K7IP3           | NA                           | 1.48                             | Xp21.2            | TGF-beta activated kinase 1/MAP3K7 binding protein 3                       | Hs.188256  |
| 1557726_at   | 3hISvsC_up_FemaleSpecific | ARMCX4              | NA                           | 1.21                             | Xq22.1            | armadillo repeat containing, X-linked 4                                    | Hs.9728    |
| 1557880_at   | 3hISvsC_up_FemaleSpecific | PCDH11X /// PCDH11Y | NA                           | 1.33                             | Xq21.3 /// Yp11.2 | protocadherin 11 X-linked /// protocadherin 11 Y-linkec                    | Hs.661308  |
| 1562805_at   | 3hISvsC_up_FemaleSpecific | LOC349408           | NA                           | 1.43                             | Xp22.31           | hypothetical LOC349408                                                     | Hs.685035  |
| 1565446_at   | 3hISvsC_up_FemaleSpecific | HPRT1               | NA                           | 1.22                             | Xq26.1            | Hypoxanthine phosphoribosyltransferase 1                                   | Hs.412707  |
| 201210_at    | 3hISvsC_up_FemaleSpecific | DDX3X               | NA                           | 1.20                             | Xp11.3-p11.23     | DEAD (Asp-Glu-Ala-Asp) box polypeptide 3, X-linkec                         | Hs.380774  |
| 201666_at    | 3hISvsC_up_FemaleSpecific | TIMP1               | NA                           | 1.29                             | Xp11.3-p11.23     | TIMP metalloproteinase inhibitor 1                                         | Hs.522632  |
| 205645_at    | 3hISvsC_up_FemaleSpecific | REPS2               | NA                           | 1.55                             | Xp22.2-p22.13     | RALBP1 associated Eps domain containing 2                                  | Hs.186810  |
| 206002_at    | 3hISvsC_up_FemaleSpecific | GPR64               | NA                           | 1.31                             | Xp22.13           | G protein-coupled receptor 64                                              | Hs.146978  |
| 210274_at    | 3hISvsC_up_FemaleSpecific | MAGEA8              | NA                           | 1.22                             | Xq28              | melanoma antigen family A, 8                                               | Hs.522803  |
| 212340_at    | 3hISvsC_up_FemaleSpecific | YIPF6               | NA                           | 1.45                             | Xq12              | Yip1 domain family, member 6                                               | Hs.82719   |
| 212457_at    | 3hISvsC_up_FemaleSpecific | TFE3                | NA                           | 1.22                             | Xp11.22           | transcription factor binding to IGHM enhancer 3                            | Hs.274184  |
| 212741_at    | 3hISvsC_up_FemaleSpecific | MAOA                | NA                           | 2.67                             | Xp11.3            | monoamine oxidase A                                                        | Hs.183109  |
| 216722_at    | 3hISvsC_up_FemaleSpecific | VENTXP1             | NA                           | 1.21                             | Xp21.3            | VENT homeobox (Xenopus laevis) pseudogene 1                                | Hs.447377  |
| 230030_at    | 3hISvsC_up_FemaleSpecific | HS6ST2              | NA                           | 1.28                             | Xq26.2            | heparan sulfate 6-O-sulfotransferase 2                                     | Hs.385956  |
| 244825_at    | 3hISvsC_up_FemaleSpecific | SHROOM4             | NA                           | 1.59                             | Xp11.22           | shroom family member 4                                                     | Hs.420541  |
| 200737_at    | 3hISvsC_up_Common         | PGK1                | 1.28                         | 1.34                             | Xq13              | phosphoglycerate kinase 1                                                  | Hs.78771   |
| 200821_at    | 3hISvsC_up_Common         | LAMP2               | 1.33                         | 1.37                             | Xq24              | lysosomal-associated membrane protein 2                                    | Hs.496684  |
| 201099_at    | 3hISvsC_up_Common         | USP9X               | 1.34                         | 1.29                             | Xp11.4            | ubiquitin specific peptidase 9, X-linkec                                   | Hs.77578   |
| 201132_at    | 3hISvsC_up_Common         | HNRNPH2             | 1.34                         | 1.41                             | Xq22              | heterogeneous nuclear ribonucleoprotein H2 (H <sup>2</sup> )               | Hs.632828  |
| 201136_at    | 3hISvsC_up_Common         | PLP2                | 1.32                         | 1.34                             | Xp11.23           | proteolipid protein 2 (colonic epithelium-enriched)                        | Hs.77422   |
| 201406_at    | 3hISvsC_up_Common         | RPL36A              | 1.74                         | 1.69                             | Xq22.1            | ribosomal protein L36a                                                     | Hs.432485  |
| 202110_at    | 3hISvsC_up_Common         | COX7B               | 1.79                         | 1.81                             | Xq21.1            | cytochrome c oxidase subunit VIIb                                          | Hs.522699  |
| 202298_at    | 3hISvsC_up_Common         | NDUFA1              | 1.42                         | 1.31                             | Xq24              | NADH dehydrogenase (ubiquinone) 1 alpha subcomplex, 1, 7.5kDa              | Hs.534168  |
| 203042_at    | 3hISvsC_up_Common         | LAMP2               | 1.30                         | 1.39                             | Xq24              | lysosomal-associated membrane protein 2                                    | Hs.496684  |
| 206464_at    | 3hISvsC_up_Common         | BMX                 | 2.42                         | 3.40                             | Xp22.2            | BMX non-receptor tyrosine kinase                                           | Hs.495731  |
| 217383_at    | 3hISvsC_up_Common         | PGK1                | 1.28                         | 1.34                             | Xq13              | Phosphoglycerate kinase 1                                                  | Hs.78771   |
| 218163_at    | 3hISvsC_up_Common         | MCTS1               | 1.33                         | 1.27                             | Xq22-q24          | malignant T cell amplified sequence 1                                      | Hs.102696  |
| 219283_at    | 3hISvsC_up_Common         | C1GALT1C1           | 1.44                         | 1.38                             | Xq24              | C1GALT1-specific chaperone 1                                               | Hs.643920  |
| 220832_at    | 3hISvsC_up_Common         | TLR8                | 1.32                         | 1.34                             | Xp22              | toll-like receptor 8                                                       | Hs.660543  |
| 221895_at    | 3hISvsC_up_Common         | MOSPD2              | 1.32                         | 1.31                             | Xp22.2            | motile sperm domain containing 2                                           | Hs.190043  |
| 222815_at    | 3hISvsC_up_Common         | RNF12               | 1.31                         | 1.33                             | Xq13-q21          | ring finger protein, LIM domain interacting                                | Hs.653288  |
| 223439_at    | 3hISvsC_up_Common         | NKAP                | 1.27                         | 1.25                             | Xq24              | NFKB activating protein                                                    | Hs.522771  |
| 225154_at    | 3hISvsC_up_Common         | SYAP1               | 1.32                         | 1.39                             | Xp22.2            | synapse associated protein 1, SAP47 homolog (Drosophila)                   | Hs.489336  |
| 226671_at    | 3hISvsC_up_Common         | LAMP2               | 1.60                         | 1.57                             | Xq24              | lysosomal-associated membrane protein 2                                    | Hs.496684  |
| 226875_at    | 3hISvsC_up_Common         | DOCK11              | 1.26                         | 1.25                             | Xq24              | dedicator of cytokinesis 11                                                | Hs.368203  |
| 227357_at    | 3hISvsC_up_Common         | MAP3K7IP3           | 1.43                         | 1.34                             | Xp21.2            | TGF-beta activated kinase 1/MAP3K7 binding protein 3                       | Hs.188256  |
| 227425_at    | 3hISvsC_up_Common         | REPS2               | 1.73                         | 1.77                             | Xp22.2-p22.13     | RALBP1 associated Eps domain containing 2                                  | Hs.186810  |
| 229560_at    | 3hISvsC_up_Common         | TLR8                | 1.30                         | 1.47                             | Xp22              | toll-like receptor 8                                                       | Hs.660543  |
| 230532_at    | 3hISvsC_up_Common         | CXorf38             | 1.41                         | 1.27                             | Xp11.4            | chromosome X open reading frame 38                                         | Hs.495961  |
| 233082_at    | 3hISvsC_up_Common         | ZNF182 /// ZNF630   | 1.95                         | 1.80                             | Xp11.3-p11.1      | zinc finger protein 630                                                    | Hs.650883  |
| 243201_at    | 3hISvsC_up_Common         | HNRNPH2             | 1.48                         | 1.33                             | Xq22              | Heterogeneous nuclear ribonucleoprotein H2 (H <sup>2</sup> )               | Hs.632828  |
| 64883_at     | 3hISvsC_up_Common         | MOSPD2              | 1.46                         | 1.40                             | Xp22.2            | motile sperm domain containing 2                                           | Hs.190043  |
| 1555590_a_at | 3hISvsC_down_MaleSpecific | GATA1               | -1.70                        | NA                               | Xp11.23           | GATA binding protein 1 (globin transcription factor 1)                     | Hs.765     |
| 202219_at    | 3hISvsC_down_MaleSpecific | SLC6A8              | -1.82                        | NA                               | Xq28              | solute carrier family 6 (neurotransmitter transporter, creatine), member 8 | Hs.540696  |
| 202711_at    | 3hISvsC_down_MaleSpecific | EFNB1               | -1.25                        | NA                               | Xq12              | ephrin-B1                                                                  | Hs.144700  |
| 206868_at    | 3hISvsC_down_MaleSpecific | STARDB8             | -1.20                        | NA                               | Xq13.1            | STAR-related lipid transfer (START) domain containing 8                    | Hs.95140   |
| 210446_at    | 3hISvsC_down_MaleSpecific | GATA1               | -1.52                        | NA                               | Xp11.23           | GATA binding protein 1 (globin transcription factor 1)                     | Hs.765     |
| 219814_at    | 3hISvsC_down_MaleSpecific | MBNL3               | -1.54                        | NA                               | Xq26.2            | muscleblind-like 3 (Drosophila)                                            | Hs.105134  |

|              |                             |                      |       |       |                      |                                                                                        |           |
|--------------|-----------------------------|----------------------|-------|-------|----------------------|----------------------------------------------------------------------------------------|-----------|
| 1552671_a_at | 3hISvsC_down_FemaleSpecific | SLC9A7               | NA    | -1.27 | Xp11.3-p11.23 Xp11.3 | solute carrier family 9 (sodium/hydrogen exchanger), member 7                          | Hs.496057 |
| 1552882_a_at | 3hISvsC_down_FemaleSpecific | FAM123B              | NA    | -1.50 | Xq11.2               | family with sequence similarity 123E                                                   | Hs.314225 |
| 1553998_at   | 3hISvsC_down_FemaleSpecific | DMRTC1 /// LOC728656 | NA    | -1.75 | Xq13.2               | DMRT-like family C1 /// DMRT-like family C1E                                           | Hs.712728 |
| 1555882_at   | 3hISvsC_down_FemaleSpecific | SPIN3                | NA    | -1.40 | Xp11.21              | spindlin family, member 3                                                              | Hs.522672 |
| 1561660_at   | 3hISvsC_down_FemaleSpecific | MCART6               | NA    | -1.96 | Xq22.2               | mitochondrial carrier triple repeat 6                                                  | Hs.660022 |
| 201540_at    | 3hISvsC_down_FemaleSpecific | FHL1                 | NA    | -1.35 | Xq26                 | four and a half LIM domains 1                                                          | Hs.435369 |
| 209167_at    | 3hISvsC_down_FemaleSpecific | GPM6B                | NA    | -1.68 | Xp22.2               | glycoprotein M6B                                                                       | Hs.495710 |
| 213289_at    | 3hISvsC_down_FemaleSpecific | APOOL                | NA    | -1.58 | Xq21.1               | Apolipoprotein O-like                                                                  | Hs.512181 |
| 214607_at    | 3hISvsC_down_FemaleSpecific | PAK3                 | NA    | -1.64 | Xq23                 | p21 protein (Cdc42/Rac)-activated kinase 3                                             | Hs.656789 |
| 218012_at    | 3hISvsC_down_FemaleSpecific | TSPYL2               | NA    | -1.29 | Xp11.2               | TSPY-like 2                                                                            | Hs.136164 |
| 223915_at    | 3hISvsC_down_FemaleSpecific | BCOR                 | NA    | -1.37 | Xp21.2-p11.4         | BCL6 co-repressor                                                                      | Hs.659681 |
| 224589_at    | 3hISvsC_down_FemaleSpecific | XIST                 | NA    | -1.48 | Xq13.2               | X (inactive)-specific transcript (non-protein coding)                                  | ---       |
| 225028_at    | 3hISvsC_down_FemaleSpecific | LOC550643            | NA    | -1.50 | Xp11.1               | hypothetical LOC550643                                                                 | Hs.355559 |
| 225382_at    | 3hISvsC_down_FemaleSpecific | ZNF275               | NA    | -1.23 | Xq28                 | zinc finger protein 275                                                                | Hs.348963 |
| 225383_at    | 3hISvsC_down_FemaleSpecific | ZNF275               | NA    | -1.43 | Xq28                 | zinc finger protein 275                                                                | Hs.348963 |
| 228005_at    | 3hISvsC_down_FemaleSpecific | ZXDB                 | NA    | -1.44 | Xp11.21              | zinc finger, X-linked, duplicated B                                                    | Hs.156257 |
| 229234_at    | 3hISvsC_down_FemaleSpecific | ZC3H12B              | NA    | -1.46 | Xq12                 | zinc finger CCCH-type containing 12B                                                   | Hs.21249  |
| 229286_at    | 3hISvsC_down_FemaleSpecific | MAGEE1               | NA    | -1.55 | Xq13.3               | melanoma antigen family E, 1                                                           | Hs.8453   |
| 229365_at    | 3hISvsC_down_FemaleSpecific | PPP1R3F              | NA    | -1.34 | Xp11.23              | similar to protein phosphatase 1, regulatory (inhibitor) subunit 3F /// protein phosph | Hs.433652 |
| 230224_at    | 3hISvsC_down_FemaleSpecific | ZCCHC18              | NA    | -1.54 | Xq22.2               | zinc finger, CCHC domain containing 18                                                 | Hs.648338 |
| 235433_at    | 3hISvsC_down_FemaleSpecific | APOOL                | NA    | -1.53 | Xq21.1               | apolipoprotein O-like                                                                  | Hs.512181 |
| 235520_at    | 3hISvsC_down_FemaleSpecific | ZNF280C              | NA    | -1.51 | Xq26.1               | zinc finger protein 280C                                                               | Hs.308418 |
| 236294_at    | 3hISvsC_down_FemaleSpecific | HUWE1                | NA    | -1.29 | Xp11.22              | HECT, UBA and WWE domain containing 1                                                  | Hs.136905 |
| 239034_at    | 3hISvsC_down_FemaleSpecific | CXorf24              | NA    | -1.33 | Xp11.23              | chromosome X open reading frame 24                                                     | Hs.597617 |
| 243764_at    | 3hISvsC_down_FemaleSpecific | VSIG1                | NA    | -1.62 | Xq22.3               | V-set and immunoglobulin domain containing 1                                           | Hs.177164 |
| 32042_at     | 3hISvsC_down_FemaleSpecific | ENOX2                | NA    | -1.24 | Xq25-q26.2           | ecto-NOX disulfide-thiol exchanger 2                                                   | Hs.171458 |
| 204459_at    | 3hISvsC_down_Common         | CSTF2                | -1.25 | -1.26 | Xq22.1               | cleavage stimulation factor, 3' pre-RNA, subunit 2, 64kDa                              | Hs.132370 |
| 207681_at    | 3hISvsC_down_Common         | CXCR3                | -1.45 | -1.42 | Xq13                 | chemokine (C-X-C motif) receptor 3                                                     | Hs.198252 |
| 208723_at    | 3hISvsC_down_Common         | USP11                | -1.29 | -1.30 | Xp11.23              | ubiquitin specific peptidase 11                                                        | Hs.171501 |
| 209014_at    | 3hISvsC_down_Common         | MAGED1               | -1.31 | -1.28 | Xp11.23              | melanoma antigen family D, 1                                                           | Hs.5258   |
| 219433_at    | 3hISvsC_down_Common         | BCOR                 | -1.28 | -1.46 | Xp21.2-p11.4         | BCL6 co-repressor                                                                      | Hs.659681 |



# SUPPLEMENTAL MATERIAL

**Supplementary Table 1. Genes differential expressed between 3h ischemic stroke (3hIS) and non-stroke controls ( C ) ( $\alpha \leq 0.05$ , fold change  $\geq |1.2|$ )**

| Probeset ID  | DE list                   | Gene Symbol         | Fold Change                  |                                  | Cytoband          | Gene Title                                                                 | UniGene ID |
|--------------|---------------------------|---------------------|------------------------------|----------------------------------|-------------------|----------------------------------------------------------------------------|------------|
|              |                           |                     | IS * Male vs. Control * Male | IS * Female vs. Control * Female |                   |                                                                            |            |
| 1553007_a_at | 3hISvsC_up_MaleSpecific   | ODZ1                | 1.38                         | NA                               | Xq25              | odz, odd Oz/ten-m homolog 1(Drosophila)                                    | Hs.23796   |
| 1554206_at   | 3hISvsC_up_MaleSpecific   | TMLHE               | 1.39                         | NA                               | Xq28              | trimethyllysine hydroxylase, epsilor                                       | Hs.133321  |
| 1559510_at   | 3hISvsC_up_MaleSpecific   | BHLHB9              | 1.51                         | NA                               | Xq23              | Basic helix-loop-helix domain containing, class B, 9                       | Hs.4276    |
| 201472_at    | 3hISvsC_up_MaleSpecific   | VBP1                | 1.35                         | NA                               | Xq28              | von Hippel-Lindau binding protein 1                                        | Hs.436803  |
| 202105_at    | 3hISvsC_up_MaleSpecific   | IGBP1               | 1.23                         | NA                               | Xq13.1-q13.3      | immunoglobulin (CD79A) binding protein 1                                   | Hs.496267  |
| 206696_at    | 3hISvsC_up_MaleSpecific   | GPR143              | 1.33                         | NA                               | Xp22.3            | G protein-coupled receptor 143                                             | Hs.74124   |
| 209022_at    | 3hISvsC_up_MaleSpecific   | STAG2               | 1.31                         | NA                               | Xq25              | stromal antigen 2                                                          | Hs.496710  |
| 214009_at    | 3hISvsC_up_MaleSpecific   | MSL3L1              | 1.40                         | NA                               | Xp22.3            | male-specific lethal 3 homolog (Drosophila)                                | Hs.655288  |
| 214681_at    | 3hISvsC_up_MaleSpecific   | GK                  | 1.51                         | NA                               | Xp21.3            | glycerol kinase                                                            | Hs.1466    |
| 219771_at    | 3hISvsC_up_MaleSpecific   | TBC1D8B             | 1.56                         | NA                               | Xq22.3            | TBC1 domain family, member 8B (with GRAM domain)                           | Hs.351798  |
| 226335_at    | 3hISvsC_up_MaleSpecific   | RPS6KA3             | 1.28                         | NA                               | Xp22.2-p22.1      | ribosomal protein S6 kinase, 90kDa, polypeptide 3                          | Hs.445387  |
| 228968_at    | 3hISvsC_up_MaleSpecific   | ZNF449              | 1.31                         | NA                               | Xq26.3            | zinc finger protein 449                                                    | Hs.28780   |
| 230866_at    | 3hISvsC_up_MaleSpecific   | CYSLTR1             | 1.39                         | NA                               | Xq13.2-q21.1      | cysteinyl leukotriene receptor 1                                           | Hs.201300  |
| 231747_at    | 3hISvsC_up_MaleSpecific   | CYSLTR1             | 1.23                         | NA                               | Xq13.2-q21.1      | cysteinyl leukotriene receptor 1                                           | Hs.201300  |
| 232087_at    | 3hISvsC_up_MaleSpecific   | CXorf23             | 1.61                         | NA                               | Xp22.12           | chromosome X open reading frame 23                                         | Hs.28896   |
| 232157_at    | 3hISvsC_up_MaleSpecific   | SPRY3               | 1.45                         | NA                               | Xq28 and Yq12     | sprouty homolog 3 (Drosophila)                                             | Hs.381912  |
| 236165_at    | 3hISvsC_up_MaleSpecific   | MSL3L1              | 1.48                         | NA                               | ---               | ---                                                                        | ---        |
| 238053_at    | 3hISvsC_up_MaleSpecific   | DHRX                | 1.44                         | NA                               | Xp22.33; Yp11.2   | dehydrogenase/reductase (SDR family) X-linkec                              | Hs.131452  |
| 238989_at    | 3hISvsC_up_MaleSpecific   | C1GALT1C1           | 1.44                         | NA                               | Xq24              | C1GALT1-specific chaperone 1                                               | Hs.643920  |
| 242931_at    | 3hISvsC_up_MaleSpecific   | LONRF3              | 1.38                         | NA                               | Xq24              | LON peptidase N-terminal domain and ring finger 3                          | Hs.144266  |
| 243683_at    | 3hISvsC_up_MaleSpecific   | MORF4L2             | 1.71                         | NA                               | Xq22              | Mortality factor 4 like 2                                                  | Hs.326387  |
| 244470_at    | 3hISvsC_up_MaleSpecific   | RNF12               | 1.27                         | NA                               | Xq13-q21          | Ring finger protein, LIM domain interacting                                | Hs.653288  |
| 1552927_at   | 3hISvsC_up_FemaleSpecific | MAP3K7IP3           | NA                           | 1.48                             | Xp21.2            | TGF-beta activated kinase 1/MAP3K7 binding protein 3                       | Hs.188256  |
| 1557726_at   | 3hISvsC_up_FemaleSpecific | ARMCX4              | NA                           | 1.21                             | Xq22.1            | armadillo repeat containing, X-linked 4                                    | Hs.9728    |
| 1557880_at   | 3hISvsC_up_FemaleSpecific | PCDH11X /// PCDH11Y | NA                           | 1.33                             | Xq21.3 /// Yp11.2 | protocadherin 11 X-linked /// protocadherin 11 Y-linkec                    | Hs.661308  |
| 1562805_at   | 3hISvsC_up_FemaleSpecific | LOC349408           | NA                           | 1.43                             | Xp22.31           | hypothetical LOC349408                                                     | Hs.685035  |
| 1565446_at   | 3hISvsC_up_FemaleSpecific | HPRT1               | NA                           | 1.22                             | Xq26.1            | Hypoxanthine phosphoribosyltransferase 1                                   | Hs.412707  |
| 201210_at    | 3hISvsC_up_FemaleSpecific | DDX3X               | NA                           | 1.20                             | Xp11.3-p11.23     | DEAD (Asp-Glu-Ala-Asp) box polypeptide 3, X-linkec                         | Hs.380774  |
| 201666_at    | 3hISvsC_up_FemaleSpecific | TIMP1               | NA                           | 1.29                             | Xp11.3-p11.23     | TIMP metalloproteinase inhibitor 1                                         | Hs.522632  |
| 205645_at    | 3hISvsC_up_FemaleSpecific | REPS2               | NA                           | 1.55                             | Xp22.2-p22.13     | RALBP1 associated Eps domain containing 2                                  | Hs.186810  |
| 206002_at    | 3hISvsC_up_FemaleSpecific | GPR64               | NA                           | 1.31                             | Xp22.13           | G protein-coupled receptor 64                                              | Hs.146978  |
| 210274_at    | 3hISvsC_up_FemaleSpecific | MAGEA8              | NA                           | 1.22                             | Xq28              | melanoma antigen family A, 8                                               | Hs.522803  |
| 212340_at    | 3hISvsC_up_FemaleSpecific | YIPF6               | NA                           | 1.45                             | Xq12              | Yip1 domain family, member 6                                               | Hs.82719   |
| 212457_at    | 3hISvsC_up_FemaleSpecific | TFE3                | NA                           | 1.22                             | Xp11.22           | transcription factor binding to IGHM enhancer 3                            | Hs.274184  |
| 212741_at    | 3hISvsC_up_FemaleSpecific | MAOA                | NA                           | 2.67                             | Xp11.3            | monoamine oxidase A                                                        | Hs.183109  |
| 216722_at    | 3hISvsC_up_FemaleSpecific | VENTXP1             | NA                           | 1.21                             | Xp21.3            | VENT homeobox (Xenopus laevis) pseudogene 1                                | Hs.447377  |
| 230030_at    | 3hISvsC_up_FemaleSpecific | HS6ST2              | NA                           | 1.28                             | Xq26.2            | heparan sulfate 6-O-sulfotransferase 2                                     | Hs.385956  |
| 244825_at    | 3hISvsC_up_FemaleSpecific | SHROOM4             | NA                           | 1.59                             | Xp11.22           | shroom family member 4                                                     | Hs.420541  |
| 200737_at    | 3hISvsC_up_Common         | PGK1                | 1.28                         | 1.34                             | Xq13              | phosphoglycerate kinase 1                                                  | Hs.78771   |
| 200821_at    | 3hISvsC_up_Common         | LAMP2               | 1.33                         | 1.37                             | Xq24              | lysosomal-associated membrane protein 2                                    | Hs.496684  |
| 201099_at    | 3hISvsC_up_Common         | USP9X               | 1.34                         | 1.29                             | Xp11.4            | ubiquitin specific peptidase 9, X-linkec                                   | Hs.77578   |
| 201132_at    | 3hISvsC_up_Common         | HNRNPH2             | 1.34                         | 1.41                             | Xq22              | heterogeneous nuclear ribonucleoprotein H2 (H <sup>2</sup> )               | Hs.632828  |
| 201136_at    | 3hISvsC_up_Common         | PLP2                | 1.32                         | 1.34                             | Xp11.23           | proteolipid protein 2 (colonic epithelium-enriched)                        | Hs.77422   |
| 201406_at    | 3hISvsC_up_Common         | RPL36A              | 1.74                         | 1.69                             | Xq22.1            | ribosomal protein L36a                                                     | Hs.432485  |
| 202110_at    | 3hISvsC_up_Common         | COX7B               | 1.79                         | 1.81                             | Xq21.1            | cytochrome c oxidase subunit VIIb                                          | Hs.522699  |
| 202298_at    | 3hISvsC_up_Common         | NDUFA1              | 1.42                         | 1.31                             | Xq24              | NADH dehydrogenase (ubiquinone) 1 alpha subcomplex, 1, 7.5kDa              | Hs.534168  |
| 203042_at    | 3hISvsC_up_Common         | LAMP2               | 1.30                         | 1.39                             | Xq24              | lysosomal-associated membrane protein 2                                    | Hs.496684  |
| 206464_at    | 3hISvsC_up_Common         | BMX                 | 2.42                         | 3.40                             | Xp22.2            | BMX non-receptor tyrosine kinase                                           | Hs.495731  |
| 217383_at    | 3hISvsC_up_Common         | PGK1                | 1.28                         | 1.34                             | Xq13              | Phosphoglycerate kinase 1                                                  | Hs.78771   |
| 218163_at    | 3hISvsC_up_Common         | MCTS1               | 1.33                         | 1.27                             | Xq22-q24          | malignant T cell amplified sequence 1                                      | Hs.102696  |
| 219283_at    | 3hISvsC_up_Common         | C1GALT1C1           | 1.44                         | 1.38                             | Xq24              | C1GALT1-specific chaperone 1                                               | Hs.643920  |
| 220832_at    | 3hISvsC_up_Common         | TLR8                | 1.32                         | 1.34                             | Xp22              | toll-like receptor 8                                                       | Hs.660543  |
| 221895_at    | 3hISvsC_up_Common         | MOSPD2              | 1.32                         | 1.31                             | Xp22.2            | motile sperm domain containing 2                                           | Hs.190043  |
| 222815_at    | 3hISvsC_up_Common         | RNF12               | 1.31                         | 1.33                             | Xq13-q21          | ring finger protein, LIM domain interacting                                | Hs.653288  |
| 223439_at    | 3hISvsC_up_Common         | NKAP                | 1.27                         | 1.25                             | Xq24              | NFKB activating protein                                                    | Hs.522771  |
| 225154_at    | 3hISvsC_up_Common         | SYAP1               | 1.32                         | 1.39                             | Xp22.2            | synapse associated protein 1, SAP47 homolog (Drosophila)                   | Hs.489336  |
| 226671_at    | 3hISvsC_up_Common         | LAMP2               | 1.60                         | 1.57                             | Xq24              | lysosomal-associated membrane protein 2                                    | Hs.496684  |
| 226875_at    | 3hISvsC_up_Common         | DOCK11              | 1.26                         | 1.25                             | Xq24              | dedicator of cytokinesis 11                                                | Hs.368203  |
| 227357_at    | 3hISvsC_up_Common         | MAP3K7IP3           | 1.43                         | 1.34                             | Xp21.2            | TGF-beta activated kinase 1/MAP3K7 binding protein 3                       | Hs.188256  |
| 227425_at    | 3hISvsC_up_Common         | REPS2               | 1.73                         | 1.77                             | Xp22.2-p22.13     | RALBP1 associated Eps domain containing 2                                  | Hs.186810  |
| 229560_at    | 3hISvsC_up_Common         | TLR8                | 1.30                         | 1.47                             | Xp22              | toll-like receptor 8                                                       | Hs.660543  |
| 230532_at    | 3hISvsC_up_Common         | CXorf38             | 1.41                         | 1.27                             | Xp11.4            | chromosome X open reading frame 38                                         | Hs.495961  |
| 233082_at    | 3hISvsC_up_Common         | ZNF182 /// ZNF630   | 1.95                         | 1.80                             | Xp11.3-p11.1      | zinc finger protein 630                                                    | Hs.650883  |
| 243201_at    | 3hISvsC_up_Common         | HNRNPH2             | 1.48                         | 1.33                             | Xq22              | Heterogeneous nuclear ribonucleoprotein H2 (H <sup>2</sup> )               | Hs.632828  |
| 64883_at     | 3hISvsC_up_Common         | MOSPD2              | 1.46                         | 1.40                             | Xp22.2            | motile sperm domain containing 2                                           | Hs.190043  |
| 1555590_a_at | 3hISvsC_down_MaleSpecific | GATA1               | -1.70                        | NA                               | Xp11.23           | GATA binding protein 1 (globin transcription factor 1)                     | Hs.765     |
| 202219_at    | 3hISvsC_down_MaleSpecific | SLC6A8              | -1.82                        | NA                               | Xq28              | solute carrier family 6 (neurotransmitter transporter, creatine), member 8 | Hs.540696  |
| 202711_at    | 3hISvsC_down_MaleSpecific | EFNB1               | -1.25                        | NA                               | Xq12              | ephrin-B1                                                                  | Hs.144700  |
| 206868_at    | 3hISvsC_down_MaleSpecific | STARDB8             | -1.20                        | NA                               | Xq13.1            | STAR-related lipid transfer (START) domain containing 8                    | Hs.95140   |
| 210446_at    | 3hISvsC_down_MaleSpecific | GATA1               | -1.52                        | NA                               | Xp11.23           | GATA binding protein 1 (globin transcription factor 1)                     | Hs.765     |
| 219814_at    | 3hISvsC_down_MaleSpecific | MBNL3               | -1.54                        | NA                               | Xq26.2            | muscleblind-like 3 (Drosophila)                                            | Hs.105134  |

|              |                             |                      |       |       |                      |                                                                                        |           |
|--------------|-----------------------------|----------------------|-------|-------|----------------------|----------------------------------------------------------------------------------------|-----------|
| 1552671_a_at | 3hISvsC_down_FemaleSpecific | SLC9A7               | NA    | -1.27 | Xp11.3-p11.23 Xp11.3 | solute carrier family 9 (sodium/hydrogen exchanger), member 7                          | Hs.496057 |
| 1552882_a_at | 3hISvsC_down_FemaleSpecific | FAM123B              | NA    | -1.50 | Xq11.2               | family with sequence similarity 123E                                                   | Hs.314225 |
| 1553998_at   | 3hISvsC_down_FemaleSpecific | DMRTC1 /// LOC728656 | NA    | -1.75 | Xq13.2               | DMRT-like family C1 /// DMRT-like family C1E                                           | Hs.712728 |
| 1555882_at   | 3hISvsC_down_FemaleSpecific | SPIN3                | NA    | -1.40 | Xp11.21              | spindlin family, member 3                                                              | Hs.522672 |
| 1561660_at   | 3hISvsC_down_FemaleSpecific | MCART6               | NA    | -1.96 | Xq22.2               | mitochondrial carrier triple repeat 6                                                  | Hs.660022 |
| 201540_at    | 3hISvsC_down_FemaleSpecific | FHL1                 | NA    | -1.35 | Xq26                 | four and a half LIM domains 1                                                          | Hs.435369 |
| 209167_at    | 3hISvsC_down_FemaleSpecific | GPM6B                | NA    | -1.68 | Xp22.2               | glycoprotein M6B                                                                       | Hs.495710 |
| 213289_at    | 3hISvsC_down_FemaleSpecific | APOOL                | NA    | -1.58 | Xq21.1               | Apolipoprotein O-like                                                                  | Hs.512181 |
| 214607_at    | 3hISvsC_down_FemaleSpecific | PAK3                 | NA    | -1.64 | Xq23                 | p21 protein (Cdc42/Rac)-activated kinase 3                                             | Hs.656789 |
| 218012_at    | 3hISvsC_down_FemaleSpecific | TSPYL2               | NA    | -1.29 | Xp11.2               | TSPY-like 2                                                                            | Hs.136164 |
| 223915_at    | 3hISvsC_down_FemaleSpecific | BCOR                 | NA    | -1.37 | Xp21.2-p11.4         | BCL6 co-repressor                                                                      | Hs.659681 |
| 224589_at    | 3hISvsC_down_FemaleSpecific | XIST                 | NA    | -1.48 | Xq13.2               | X (inactive)-specific transcript (non-protein coding)                                  | ---       |
| 225028_at    | 3hISvsC_down_FemaleSpecific | LOC550643            | NA    | -1.50 | Xp11.1               | hypothetical LOC550643                                                                 | Hs.355559 |
| 225382_at    | 3hISvsC_down_FemaleSpecific | ZNF275               | NA    | -1.23 | Xq28                 | zinc finger protein 275                                                                | Hs.348963 |
| 225383_at    | 3hISvsC_down_FemaleSpecific | ZNF275               | NA    | -1.43 | Xq28                 | zinc finger protein 275                                                                | Hs.348963 |
| 228005_at    | 3hISvsC_down_FemaleSpecific | ZXDB                 | NA    | -1.44 | Xp11.21              | zinc finger, X-linked, duplicated B                                                    | Hs.156257 |
| 229234_at    | 3hISvsC_down_FemaleSpecific | ZC3H12B              | NA    | -1.46 | Xq12                 | zinc finger CCCH-type containing 12B                                                   | Hs.21249  |
| 229286_at    | 3hISvsC_down_FemaleSpecific | MAGEE1               | NA    | -1.55 | Xq13.3               | melanoma antigen family E, 1                                                           | Hs.8453   |
| 229365_at    | 3hISvsC_down_FemaleSpecific | PPP1R3F              | NA    | -1.34 | Xp11.23              | similar to protein phosphatase 1, regulatory (inhibitor) subunit 3F /// protein phosph | Hs.433652 |
| 230224_at    | 3hISvsC_down_FemaleSpecific | ZCCHC18              | NA    | -1.54 | Xq22.2               | zinc finger, CCHC domain containing 18                                                 | Hs.648338 |
| 235433_at    | 3hISvsC_down_FemaleSpecific | APOOL                | NA    | -1.53 | Xq21.1               | apolipoprotein O-like                                                                  | Hs.512181 |
| 235520_at    | 3hISvsC_down_FemaleSpecific | ZNF280C              | NA    | -1.51 | Xq26.1               | zinc finger protein 280C                                                               | Hs.308418 |
| 236294_at    | 3hISvsC_down_FemaleSpecific | HUWE1                | NA    | -1.29 | Xp11.22              | HECT, UBA and WWE domain containing 1                                                  | Hs.136905 |
| 239034_at    | 3hISvsC_down_FemaleSpecific | CXorf24              | NA    | -1.33 | Xp11.23              | chromosome X open reading frame 24                                                     | Hs.597617 |
| 243764_at    | 3hISvsC_down_FemaleSpecific | VSIG1                | NA    | -1.62 | Xq22.3               | V-set and immunoglobulin domain containing 1                                           | Hs.177164 |
| 32042_at     | 3hISvsC_down_FemaleSpecific | ENOX2                | NA    | -1.24 | Xq25-q26.2           | ecto-NOX disulfide-thiol exchanger 2                                                   | Hs.171458 |
| 204459_at    | 3hISvsC_down_Common         | CSTF2                | -1.25 | -1.26 | Xq22.1               | cleavage stimulation factor, 3' pre-RNA, subunit 2, 64kDa                              | Hs.132370 |
| 207681_at    | 3hISvsC_down_Common         | CXCR3                | -1.45 | -1.42 | Xq13                 | chemokine (C-X-C motif) receptor 3                                                     | Hs.198252 |
| 208723_at    | 3hISvsC_down_Common         | USP11                | -1.29 | -1.30 | Xp11.23              | ubiquitin specific peptidase 11                                                        | Hs.171501 |
| 209014_at    | 3hISvsC_down_Common         | MAGED1               | -1.31 | -1.28 | Xp11.23              | melanoma antigen family D, 1                                                           | Hs.5258   |
| 219433_at    | 3hISvsC_down_Common         | BCOR                 | -1.28 | -1.46 | Xp21.2-p11.4         | BCL6 co-repressor                                                                      | Hs.659681 |

# SUPPLEMENTAL MATERIAL

**Supplementary Table 1. Genes differential expressed between 3h ischemic stroke (3hIS) and non-stroke controls ( C ) ( $\alpha \leq 0.05$ , fold change  $\geq |1.2|$ )**

| Probeset ID  | DE list                   | Gene Symbol         | Fold Change                  |                                  | Cytoband          | Gene Title                                                                 | UniGene ID |
|--------------|---------------------------|---------------------|------------------------------|----------------------------------|-------------------|----------------------------------------------------------------------------|------------|
|              |                           |                     | IS * Male vs. Control * Male | IS * Female vs. Control * Female |                   |                                                                            |            |
| 1553007_a_at | 3hISvsC_up_MaleSpecific   | ODZ1                | 1.38                         | NA                               | Xq25              | odz, odd Oz/ten-m homolog 1(Drosophila)                                    | Hs.23796   |
| 1554206_at   | 3hISvsC_up_MaleSpecific   | TMLHE               | 1.39                         | NA                               | Xq28              | trimethyllysine hydroxylase, epsilor                                       | Hs.133321  |
| 1559510_at   | 3hISvsC_up_MaleSpecific   | BHLHB9              | 1.51                         | NA                               | Xq23              | Basic helix-loop-helix domain containing, class B, 9                       | Hs.4276    |
| 201472_at    | 3hISvsC_up_MaleSpecific   | VBP1                | 1.35                         | NA                               | Xq28              | von Hippel-Lindau binding protein 1                                        | Hs.436803  |
| 202105_at    | 3hISvsC_up_MaleSpecific   | IGBP1               | 1.23                         | NA                               | Xq13.1-q13.3      | immunoglobulin (CD79A) binding protein 1                                   | Hs.496267  |
| 206696_at    | 3hISvsC_up_MaleSpecific   | GPR143              | 1.33                         | NA                               | Xp22.3            | G protein-coupled receptor 143                                             | Hs.74124   |
| 209022_at    | 3hISvsC_up_MaleSpecific   | STAG2               | 1.31                         | NA                               | Xq25              | stromal antigen 2                                                          | Hs.496710  |
| 214009_at    | 3hISvsC_up_MaleSpecific   | MSL3L1              | 1.40                         | NA                               | Xp22.3            | male-specific lethal 3 homolog (Drosophila)                                | Hs.655288  |
| 214681_at    | 3hISvsC_up_MaleSpecific   | GK                  | 1.51                         | NA                               | Xp21.3            | glycerol kinase                                                            | Hs.1466    |
| 219771_at    | 3hISvsC_up_MaleSpecific   | TBC1D8B             | 1.56                         | NA                               | Xq22.3            | TBC1 domain family, member 8B (with GRAM domain)                           | Hs.351798  |
| 226335_at    | 3hISvsC_up_MaleSpecific   | RPS6KA3             | 1.28                         | NA                               | Xp22.2-p22.1      | ribosomal protein S6 kinase, 90kDa, polypeptide 3                          | Hs.445387  |
| 228968_at    | 3hISvsC_up_MaleSpecific   | ZNF449              | 1.31                         | NA                               | Xq26.3            | zinc finger protein 449                                                    | Hs.28780   |
| 230866_at    | 3hISvsC_up_MaleSpecific   | CYSLTR1             | 1.39                         | NA                               | Xq13.2-q21.1      | cysteinyl leukotriene receptor 1                                           | Hs.201300  |
| 231747_at    | 3hISvsC_up_MaleSpecific   | CYSLTR1             | 1.23                         | NA                               | Xq13.2-q21.1      | cysteinyl leukotriene receptor 1                                           | Hs.201300  |
| 232087_at    | 3hISvsC_up_MaleSpecific   | CXorf23             | 1.61                         | NA                               | Xp22.12           | chromosome X open reading frame 23                                         | Hs.28896   |
| 232157_at    | 3hISvsC_up_MaleSpecific   | SPRY3               | 1.45                         | NA                               | Xq28 and Yq12     | sprouty homolog 3 (Drosophila)                                             | Hs.381912  |
| 236165_at    | 3hISvsC_up_MaleSpecific   | MSL3L1              | 1.48                         | NA                               | ---               | ---                                                                        | ---        |
| 238053_at    | 3hISvsC_up_MaleSpecific   | DHRX                | 1.44                         | NA                               | Xp22.33; Yp11.2   | dehydrogenase/reductase (SDR family) X-linkec                              | Hs.131452  |
| 238989_at    | 3hISvsC_up_MaleSpecific   | C1GALT1C1           | 1.44                         | NA                               | Xq24              | C1GALT1-specific chaperone 1                                               | Hs.643920  |
| 242931_at    | 3hISvsC_up_MaleSpecific   | LONRF3              | 1.38                         | NA                               | Xq24              | LON peptidase N-terminal domain and ring finger 3                          | Hs.144266  |
| 243683_at    | 3hISvsC_up_MaleSpecific   | MORF4L2             | 1.71                         | NA                               | Xq22              | Mortality factor 4 like 2                                                  | Hs.326387  |
| 244470_at    | 3hISvsC_up_MaleSpecific   | RNF12               | 1.27                         | NA                               | Xq13-q21          | Ring finger protein, LIM domain interacting                                | Hs.653288  |
| 1552927_at   | 3hISvsC_up_FemaleSpecific | MAP3K7IP3           | NA                           | 1.48                             | Xp21.2            | TGF-beta activated kinase 1/MAP3K7 binding protein 3                       | Hs.188256  |
| 1557726_at   | 3hISvsC_up_FemaleSpecific | ARMCX4              | NA                           | 1.21                             | Xq22.1            | armadillo repeat containing, X-linked 4                                    | Hs.9728    |
| 1557880_at   | 3hISvsC_up_FemaleSpecific | PCDH11X /// PCDH11Y | NA                           | 1.33                             | Xq21.3 /// Yp11.2 | protocadherin 11 X-linked /// protocadherin 11 Y-linkec                    | Hs.661308  |
| 1562805_at   | 3hISvsC_up_FemaleSpecific | LOC349408           | NA                           | 1.43                             | Xp22.31           | hypothetical LOC349408                                                     | Hs.685035  |
| 1565446_at   | 3hISvsC_up_FemaleSpecific | HPRT1               | NA                           | 1.22                             | Xq26.1            | Hypoxanthine phosphoribosyltransferase 1                                   | Hs.412707  |
| 201210_at    | 3hISvsC_up_FemaleSpecific | DDX3X               | NA                           | 1.20                             | Xp11.3-p11.23     | DEAD (Asp-Glu-Ala-Asp) box polypeptide 3, X-linkec                         | Hs.380774  |
| 201666_at    | 3hISvsC_up_FemaleSpecific | TIMP1               | NA                           | 1.29                             | Xp11.3-p11.23     | TIMP metalloproteinase inhibitor 1                                         | Hs.522632  |
| 205645_at    | 3hISvsC_up_FemaleSpecific | REPS2               | NA                           | 1.55                             | Xp22.2-p22.13     | RALBP1 associated Eps domain containing 2                                  | Hs.186810  |
| 206002_at    | 3hISvsC_up_FemaleSpecific | GPR64               | NA                           | 1.31                             | Xp22.13           | G protein-coupled receptor 64                                              | Hs.146978  |
| 210274_at    | 3hISvsC_up_FemaleSpecific | MAGEA8              | NA                           | 1.22                             | Xq28              | melanoma antigen family A, 8                                               | Hs.522803  |
| 212340_at    | 3hISvsC_up_FemaleSpecific | YIPF6               | NA                           | 1.45                             | Xq12              | Yip1 domain family, member 6                                               | Hs.82719   |
| 212457_at    | 3hISvsC_up_FemaleSpecific | TFE3                | NA                           | 1.22                             | Xp11.22           | transcription factor binding to IGHM enhancer 3                            | Hs.274184  |
| 212741_at    | 3hISvsC_up_FemaleSpecific | MAOA                | NA                           | 2.67                             | Xp11.3            | monoamine oxidase A                                                        | Hs.183109  |
| 216722_at    | 3hISvsC_up_FemaleSpecific | VENTXP1             | NA                           | 1.21                             | Xp21.3            | VENT homeobox (Xenopus laevis) pseudogene 1                                | Hs.447377  |
| 230030_at    | 3hISvsC_up_FemaleSpecific | HS6ST2              | NA                           | 1.28                             | Xq26.2            | heparan sulfate 6-O-sulfotransferase 2                                     | Hs.385956  |
| 244825_at    | 3hISvsC_up_FemaleSpecific | SHROOM4             | NA                           | 1.59                             | Xp11.22           | shroom family member 4                                                     | Hs.420541  |
| 200737_at    | 3hISvsC_up_Common         | PGK1                | 1.28                         | 1.34                             | Xq13              | phosphoglycerate kinase 1                                                  | Hs.78771   |
| 200821_at    | 3hISvsC_up_Common         | LAMP2               | 1.33                         | 1.37                             | Xq24              | lysosomal-associated membrane protein 2                                    | Hs.496684  |
| 201099_at    | 3hISvsC_up_Common         | USP9X               | 1.34                         | 1.29                             | Xp11.4            | ubiquitin specific peptidase 9, X-linkec                                   | Hs.77578   |
| 201132_at    | 3hISvsC_up_Common         | HNRNPH2             | 1.34                         | 1.41                             | Xq22              | heterogeneous nuclear ribonucleoprotein H2 (H <sup>2</sup> )               | Hs.632828  |
| 201136_at    | 3hISvsC_up_Common         | PLP2                | 1.32                         | 1.34                             | Xp11.23           | proteolipid protein 2 (colonic epithelium-enriched)                        | Hs.77422   |
| 201406_at    | 3hISvsC_up_Common         | RPL36A              | 1.74                         | 1.69                             | Xq22.1            | ribosomal protein L36a                                                     | Hs.432485  |
| 202110_at    | 3hISvsC_up_Common         | COX7B               | 1.79                         | 1.81                             | Xq21.1            | cytochrome c oxidase subunit VIIb                                          | Hs.522699  |
| 202298_at    | 3hISvsC_up_Common         | NDUFA1              | 1.42                         | 1.31                             | Xq24              | NADH dehydrogenase (ubiquinone) 1 alpha subcomplex, 1, 7.5kDa              | Hs.534168  |
| 203042_at    | 3hISvsC_up_Common         | LAMP2               | 1.30                         | 1.39                             | Xq24              | lysosomal-associated membrane protein 2                                    | Hs.496684  |
| 206464_at    | 3hISvsC_up_Common         | BMX                 | 2.42                         | 3.40                             | Xp22.2            | BMX non-receptor tyrosine kinase                                           | Hs.495731  |
| 217383_at    | 3hISvsC_up_Common         | PGK1                | 1.28                         | 1.34                             | Xq13              | Phosphoglycerate kinase 1                                                  | Hs.78771   |
| 218163_at    | 3hISvsC_up_Common         | MCTS1               | 1.33                         | 1.27                             | Xq22-q24          | malignant T cell amplified sequence 1                                      | Hs.102696  |
| 219283_at    | 3hISvsC_up_Common         | C1GALT1C1           | 1.44                         | 1.38                             | Xq24              | C1GALT1-specific chaperone 1                                               | Hs.643920  |
| 220832_at    | 3hISvsC_up_Common         | TLR8                | 1.32                         | 1.34                             | Xp22              | toll-like receptor 8                                                       | Hs.660543  |
| 221895_at    | 3hISvsC_up_Common         | MOSPD2              | 1.32                         | 1.31                             | Xp22.2            | motile sperm domain containing 2                                           | Hs.190043  |
| 222815_at    | 3hISvsC_up_Common         | RNF12               | 1.31                         | 1.33                             | Xq13-q21          | ring finger protein, LIM domain interacting                                | Hs.653288  |
| 223439_at    | 3hISvsC_up_Common         | NKAP                | 1.27                         | 1.25                             | Xq24              | NFKB activating protein                                                    | Hs.522771  |
| 225154_at    | 3hISvsC_up_Common         | SYAP1               | 1.32                         | 1.39                             | Xp22.2            | synapse associated protein 1, SAP47 homolog (Drosophila)                   | Hs.489336  |
| 226671_at    | 3hISvsC_up_Common         | LAMP2               | 1.60                         | 1.57                             | Xq24              | lysosomal-associated membrane protein 2                                    | Hs.496684  |
| 226875_at    | 3hISvsC_up_Common         | DOCK11              | 1.26                         | 1.25                             | Xq24              | dedicator of cytokinesis 11                                                | Hs.368203  |
| 227357_at    | 3hISvsC_up_Common         | MAP3K7IP3           | 1.43                         | 1.34                             | Xp21.2            | TGF-beta activated kinase 1/MAP3K7 binding protein 3                       | Hs.188256  |
| 227425_at    | 3hISvsC_up_Common         | REPS2               | 1.73                         | 1.77                             | Xp22.2-p22.13     | RALBP1 associated Eps domain containing 2                                  | Hs.186810  |
| 229560_at    | 3hISvsC_up_Common         | TLR8                | 1.30                         | 1.47                             | Xp22              | toll-like receptor 8                                                       | Hs.660543  |
| 230532_at    | 3hISvsC_up_Common         | CXorf38             | 1.41                         | 1.27                             | Xp11.4            | chromosome X open reading frame 38                                         | Hs.495961  |
| 233082_at    | 3hISvsC_up_Common         | ZNF182 /// ZNF630   | 1.95                         | 1.80                             | Xp11.3-p11.1      | zinc finger protein 630                                                    | Hs.650883  |
| 243201_at    | 3hISvsC_up_Common         | HNRNPH2             | 1.48                         | 1.33                             | Xq22              | Heterogeneous nuclear ribonucleoprotein H2 (H <sup>2</sup> )               | Hs.632828  |
| 64883_at     | 3hISvsC_up_Common         | MOSPD2              | 1.46                         | 1.40                             | Xp22.2            | motile sperm domain containing 2                                           | Hs.190043  |
| 1555590_a_at | 3hISvsC_down_MaleSpecific | GATA1               | -1.70                        | NA                               | Xp11.23           | GATA binding protein 1 (globin transcription factor 1)                     | Hs.765     |
| 202219_at    | 3hISvsC_down_MaleSpecific | SLC6A8              | -1.82                        | NA                               | Xq28              | solute carrier family 6 (neurotransmitter transporter, creatine), member 8 | Hs.540696  |
| 202711_at    | 3hISvsC_down_MaleSpecific | EFNB1               | -1.25                        | NA                               | Xq12              | ephrin-B1                                                                  | Hs.144700  |
| 206868_at    | 3hISvsC_down_MaleSpecific | STARDB8             | -1.20                        | NA                               | Xq13.1            | STAR-related lipid transfer (START) domain containing 8                    | Hs.95140   |
| 210446_at    | 3hISvsC_down_MaleSpecific | GATA1               | -1.52                        | NA                               | Xp11.23           | GATA binding protein 1 (globin transcription factor 1)                     | Hs.765     |
| 219814_at    | 3hISvsC_down_MaleSpecific | MBNL3               | -1.54                        | NA                               | Xq26.2            | muscleblind-like 3 (Drosophila)                                            | Hs.105134  |

|              |                             |                      |       |       |                      |                                                                                        |           |
|--------------|-----------------------------|----------------------|-------|-------|----------------------|----------------------------------------------------------------------------------------|-----------|
| 1552671_a_at | 3hISvsC_down_FemaleSpecific | SLC9A7               | NA    | -1.27 | Xp11.3-p11.23 Xp11.3 | solute carrier family 9 (sodium/hydrogen exchanger), member 7                          | Hs.496057 |
| 1552882_a_at | 3hISvsC_down_FemaleSpecific | FAM123B              | NA    | -1.50 | Xq11.2               | family with sequence similarity 123E                                                   | Hs.314225 |
| 1553998_at   | 3hISvsC_down_FemaleSpecific | DMRTC1 /// LOC728656 | NA    | -1.75 | Xq13.2               | DMRT-like family C1 /// DMRT-like family C1E                                           | Hs.712728 |
| 1555882_at   | 3hISvsC_down_FemaleSpecific | SPIN3                | NA    | -1.40 | Xp11.21              | spindlin family, member 3                                                              | Hs.522672 |
| 1561660_at   | 3hISvsC_down_FemaleSpecific | MCART6               | NA    | -1.96 | Xq22.2               | mitochondrial carrier triple repeat 6                                                  | Hs.660022 |
| 201540_at    | 3hISvsC_down_FemaleSpecific | FHL1                 | NA    | -1.35 | Xq26                 | four and a half LIM domains 1                                                          | Hs.435369 |
| 209167_at    | 3hISvsC_down_FemaleSpecific | GPM6B                | NA    | -1.68 | Xp22.2               | glycoprotein M6B                                                                       | Hs.495710 |
| 213289_at    | 3hISvsC_down_FemaleSpecific | APOOL                | NA    | -1.58 | Xq21.1               | Apolipoprotein O-like                                                                  | Hs.512181 |
| 214607_at    | 3hISvsC_down_FemaleSpecific | PAK3                 | NA    | -1.64 | Xq23                 | p21 protein (Cdc42/Rac)-activated kinase 3                                             | Hs.656789 |
| 218012_at    | 3hISvsC_down_FemaleSpecific | TSPYL2               | NA    | -1.29 | Xp11.2               | TSPY-like 2                                                                            | Hs.136164 |
| 223915_at    | 3hISvsC_down_FemaleSpecific | BCOR                 | NA    | -1.37 | Xp21.2-p11.4         | BCL6 co-repressor                                                                      | Hs.659681 |
| 224589_at    | 3hISvsC_down_FemaleSpecific | XIST                 | NA    | -1.48 | Xq13.2               | X (inactive)-specific transcript (non-protein coding)                                  | ---       |
| 225028_at    | 3hISvsC_down_FemaleSpecific | LOC550643            | NA    | -1.50 | Xp11.1               | hypothetical LOC550643                                                                 | Hs.355559 |
| 225382_at    | 3hISvsC_down_FemaleSpecific | ZNF275               | NA    | -1.23 | Xq28                 | zinc finger protein 275                                                                | Hs.348963 |
| 225383_at    | 3hISvsC_down_FemaleSpecific | ZNF275               | NA    | -1.43 | Xq28                 | zinc finger protein 275                                                                | Hs.348963 |
| 228005_at    | 3hISvsC_down_FemaleSpecific | ZXDB                 | NA    | -1.44 | Xp11.21              | zinc finger, X-linked, duplicated B                                                    | Hs.156257 |
| 229234_at    | 3hISvsC_down_FemaleSpecific | ZC3H12B              | NA    | -1.46 | Xq12                 | zinc finger CCCH-type containing 12B                                                   | Hs.21249  |
| 229286_at    | 3hISvsC_down_FemaleSpecific | MAGEE1               | NA    | -1.55 | Xq13.3               | melanoma antigen family E, 1                                                           | Hs.8453   |
| 229365_at    | 3hISvsC_down_FemaleSpecific | PPP1R3F              | NA    | -1.34 | Xp11.23              | similar to protein phosphatase 1, regulatory (inhibitor) subunit 3F /// protein phosph | Hs.433652 |
| 230224_at    | 3hISvsC_down_FemaleSpecific | ZCCHC18              | NA    | -1.54 | Xq22.2               | zinc finger, CCHC domain containing 18                                                 | Hs.648338 |
| 235433_at    | 3hISvsC_down_FemaleSpecific | APOOL                | NA    | -1.53 | Xq21.1               | apolipoprotein O-like                                                                  | Hs.512181 |
| 235520_at    | 3hISvsC_down_FemaleSpecific | ZNF280C              | NA    | -1.51 | Xq26.1               | zinc finger protein 280C                                                               | Hs.308418 |
| 236294_at    | 3hISvsC_down_FemaleSpecific | HUWE1                | NA    | -1.29 | Xp11.22              | HECT, UBA and WWE domain containing 1                                                  | Hs.136905 |
| 239034_at    | 3hISvsC_down_FemaleSpecific | CXorf24              | NA    | -1.33 | Xp11.23              | chromosome X open reading frame 24                                                     | Hs.597617 |
| 243764_at    | 3hISvsC_down_FemaleSpecific | VSIG1                | NA    | -1.62 | Xq22.3               | V-set and immunoglobulin domain containing 1                                           | Hs.177164 |
| 32042_at     | 3hISvsC_down_FemaleSpecific | ENOX2                | NA    | -1.24 | Xq25-q26.2           | ecto-NOX disulfide-thiol exchanger 2                                                   | Hs.171458 |
| 204459_at    | 3hISvsC_down_Common         | CSTF2                | -1.25 | -1.26 | Xq22.1               | cleavage stimulation factor, 3' pre-RNA, subunit 2, 64kDa                              | Hs.132370 |
| 207681_at    | 3hISvsC_down_Common         | CXCR3                | -1.45 | -1.42 | Xq13                 | chemokine (C-X-C motif) receptor 3                                                     | Hs.198252 |
| 208723_at    | 3hISvsC_down_Common         | USP11                | -1.29 | -1.30 | Xp11.23              | ubiquitin specific peptidase 11                                                        | Hs.171501 |
| 209014_at    | 3hISvsC_down_Common         | MAGED1               | -1.31 | -1.28 | Xp11.23              | melanoma antigen family D, 1                                                           | Hs.5258   |
| 219433_at    | 3hISvsC_down_Common         | BCOR                 | -1.28 | -1.46 | Xp21.2-p11.4         | BCL6 co-repressor                                                                      | Hs.659681 |

Supplementary Figure 1

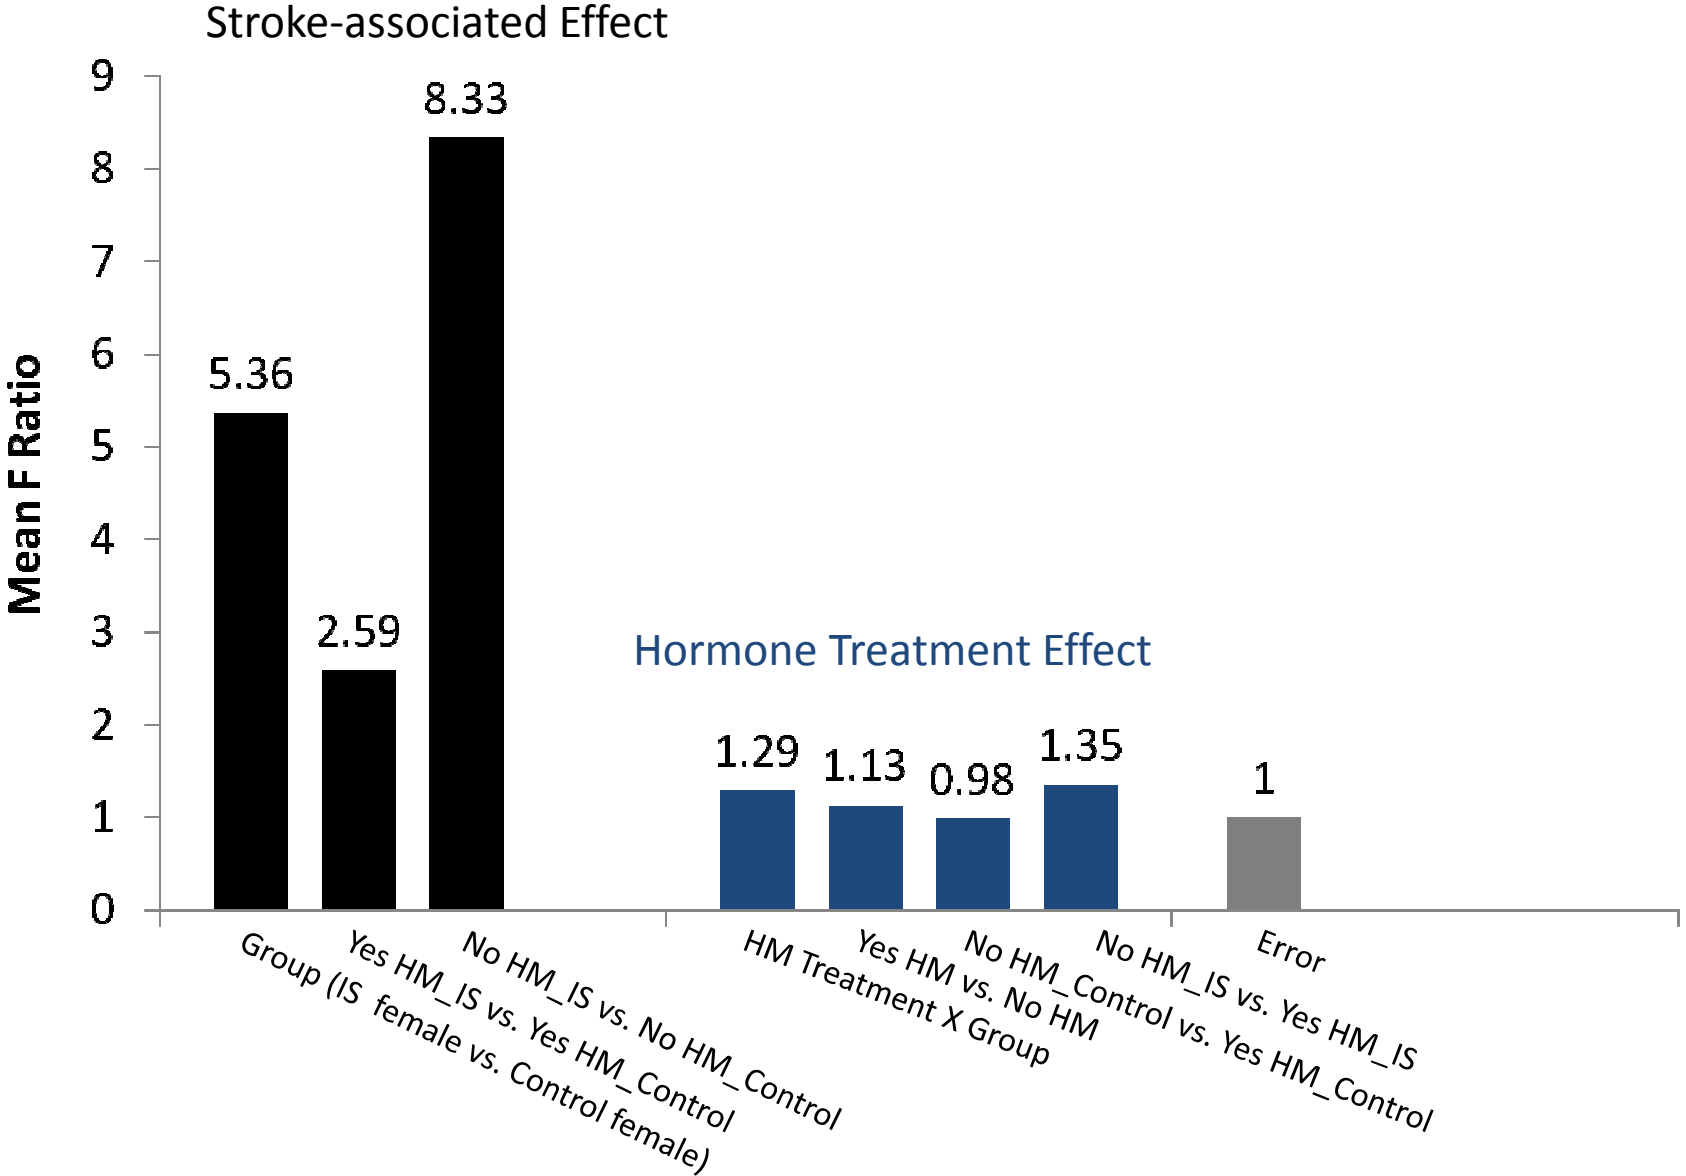

**Supplementary Figure 1.** Sources of variation on gene expression. Sub-analysis on 26 ischemic stroke (IS) females and 34 control females. Factors in black represent large Group (Stroke-associated) effects independent of hormone medication (HM) status. Factors in blue represent small effects of hormone medication on gene expression. Gray bar - residual error; set to 1.

## Supplementary Figure 2

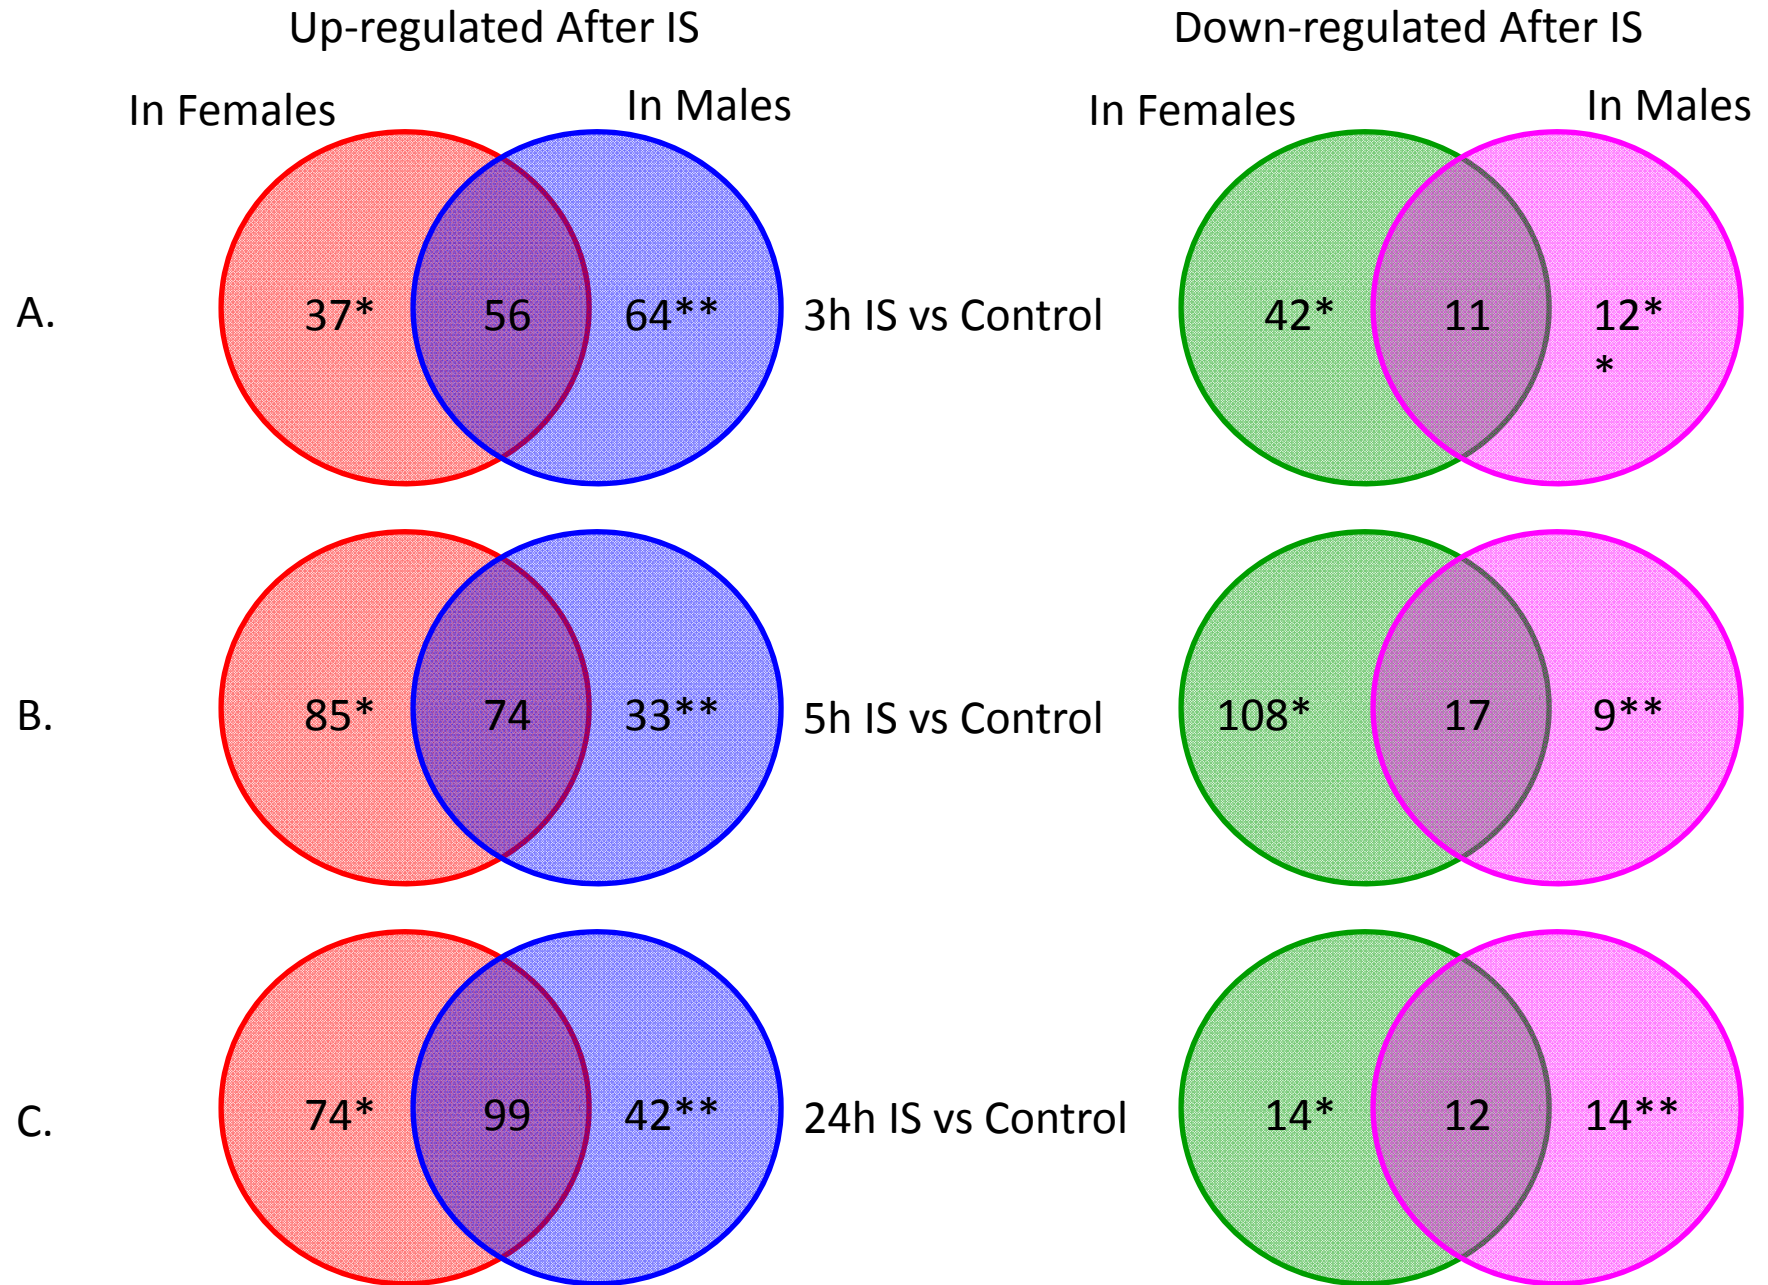

**Supplementary Figure 2.** Sub-analysis of matched sets of IS and Control males and females. Numbers of probe sets (to specific genes) on the X-chromosome regulated at 3, 5 and 24 h after ischemic stroke (IS). \* Female-specific stroke genes. \*\* Male-specific stroke genes. For these analyses IS females were compared to control females; and IS males were compared to control males. No gene was expressed in opposite directions in males and females. Red = up regulated in females. Blue = up regulated in males. Green = down regulated in females. Pink = down regulated in males.
